# Supplementary material for: A divergent route towards single-chemical entity triazine dendrimers with opportunities for structural diversity
Source: Royal Society of Chemistry journal article supplement (doi:10.1039/b617875h), 2007-01-01
Supplement: b617875h.pdf [file b617875h.pdf]

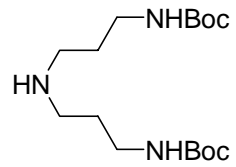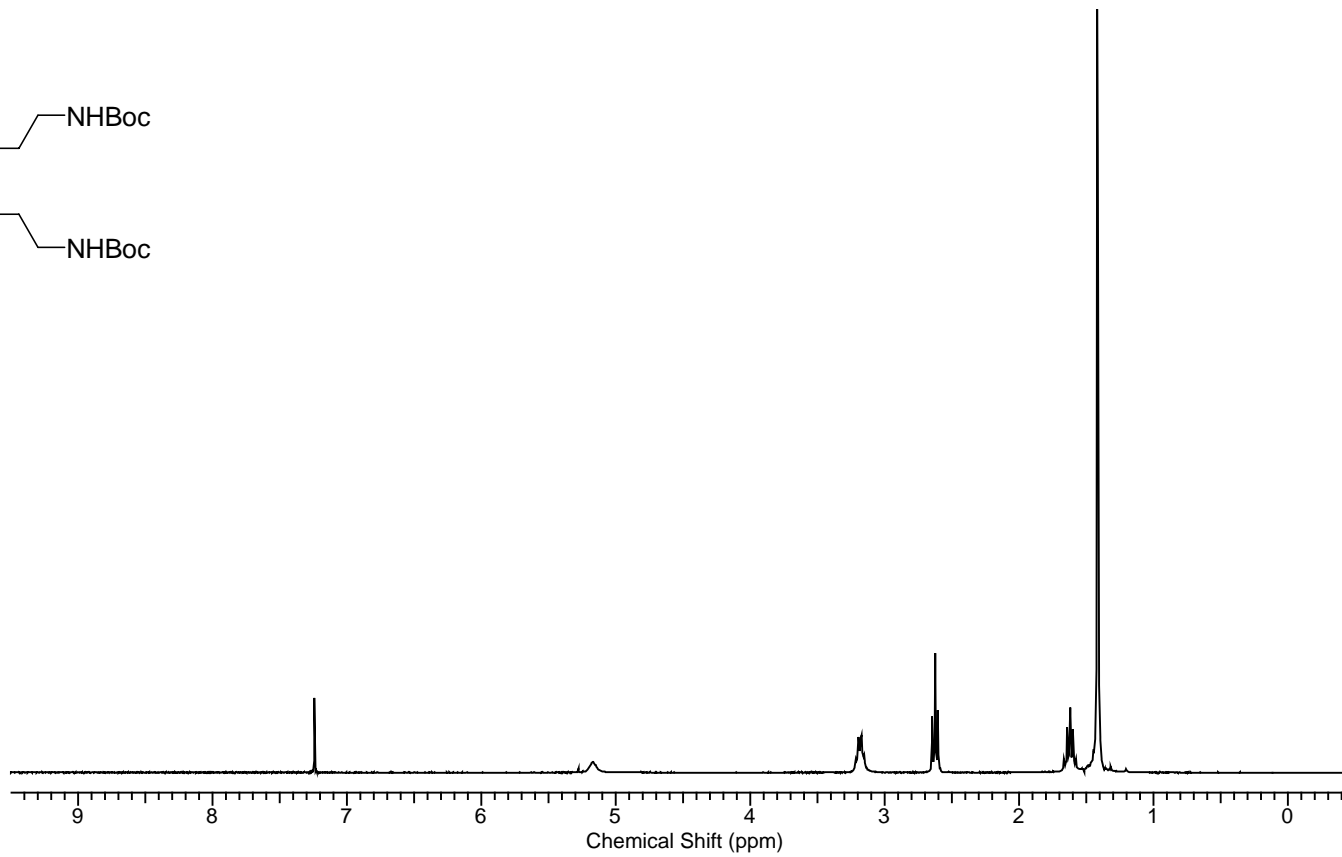

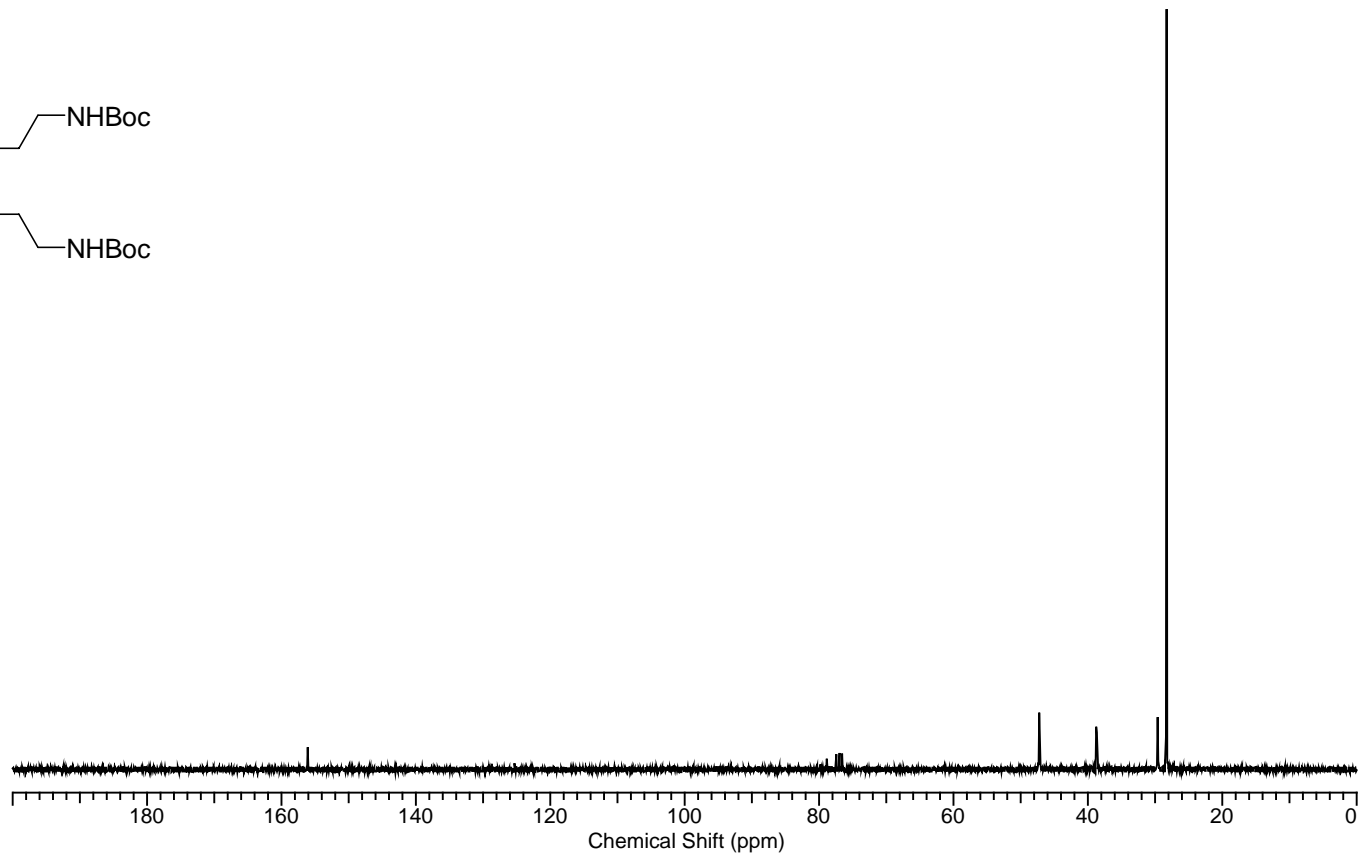

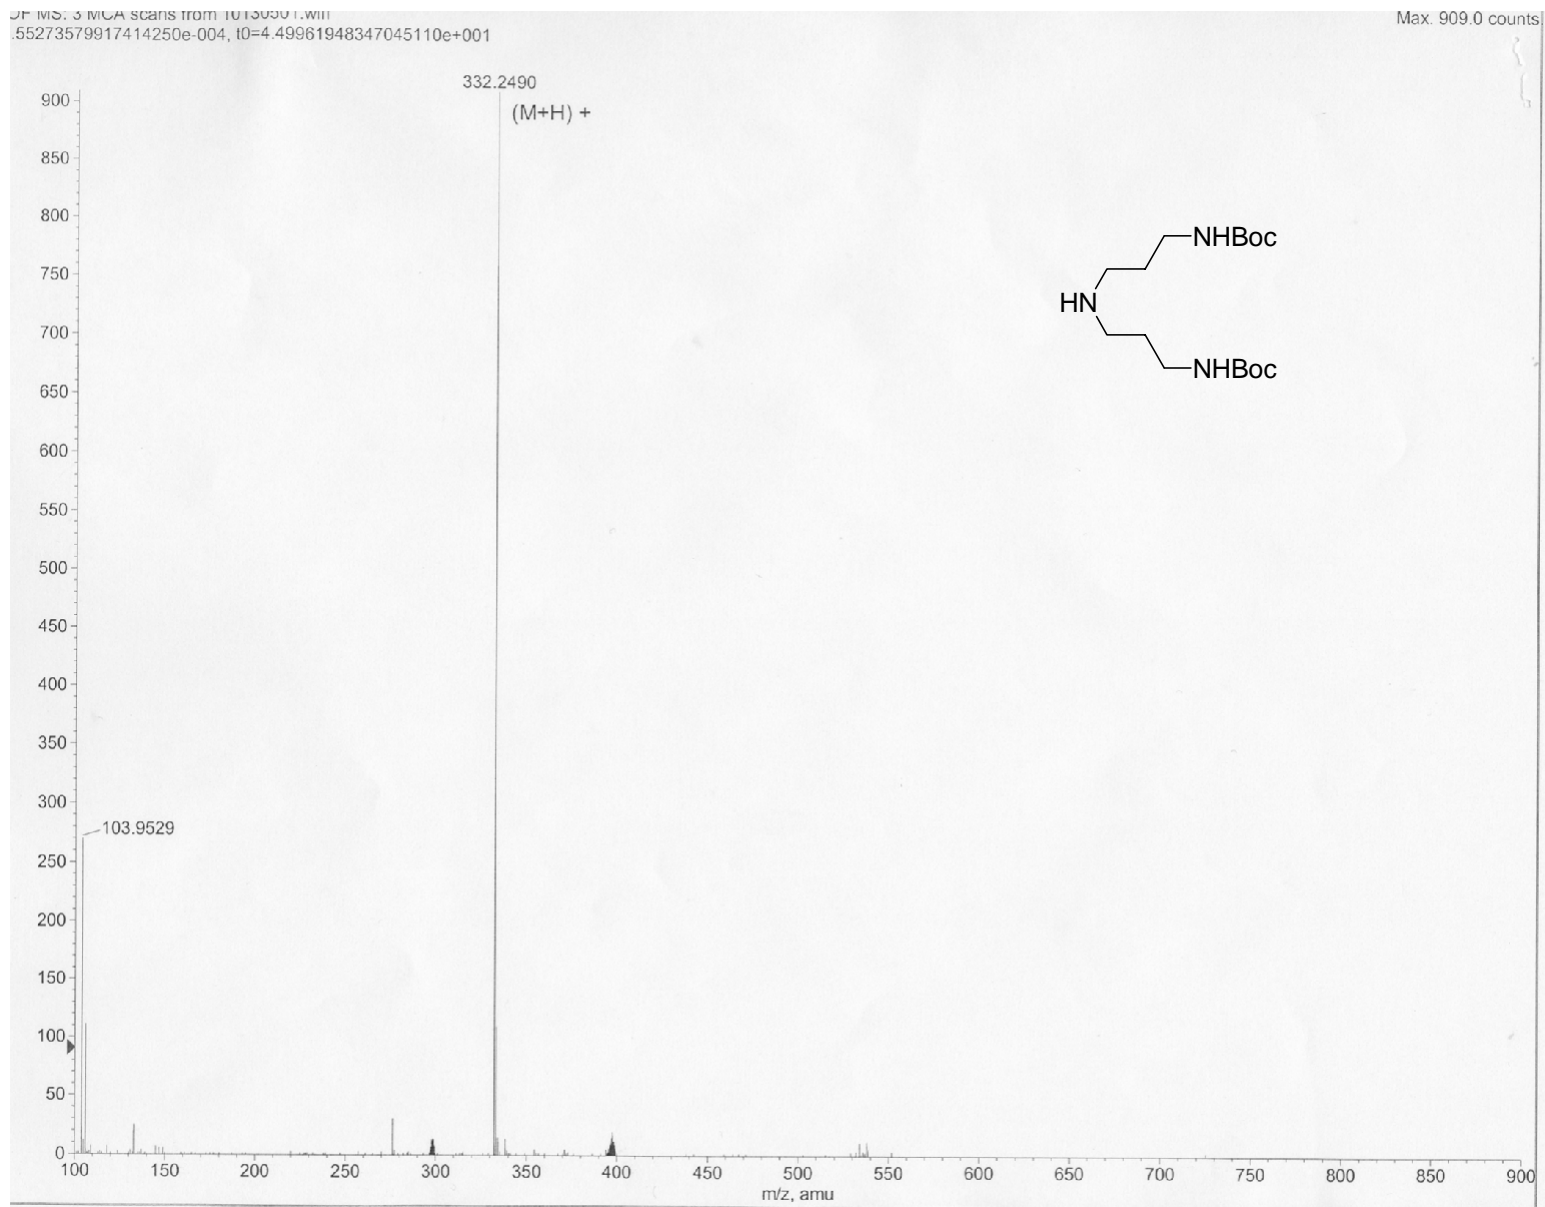

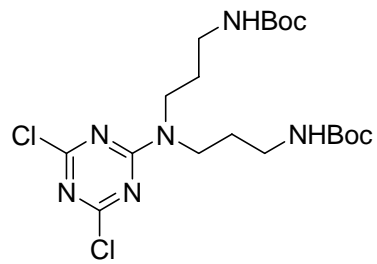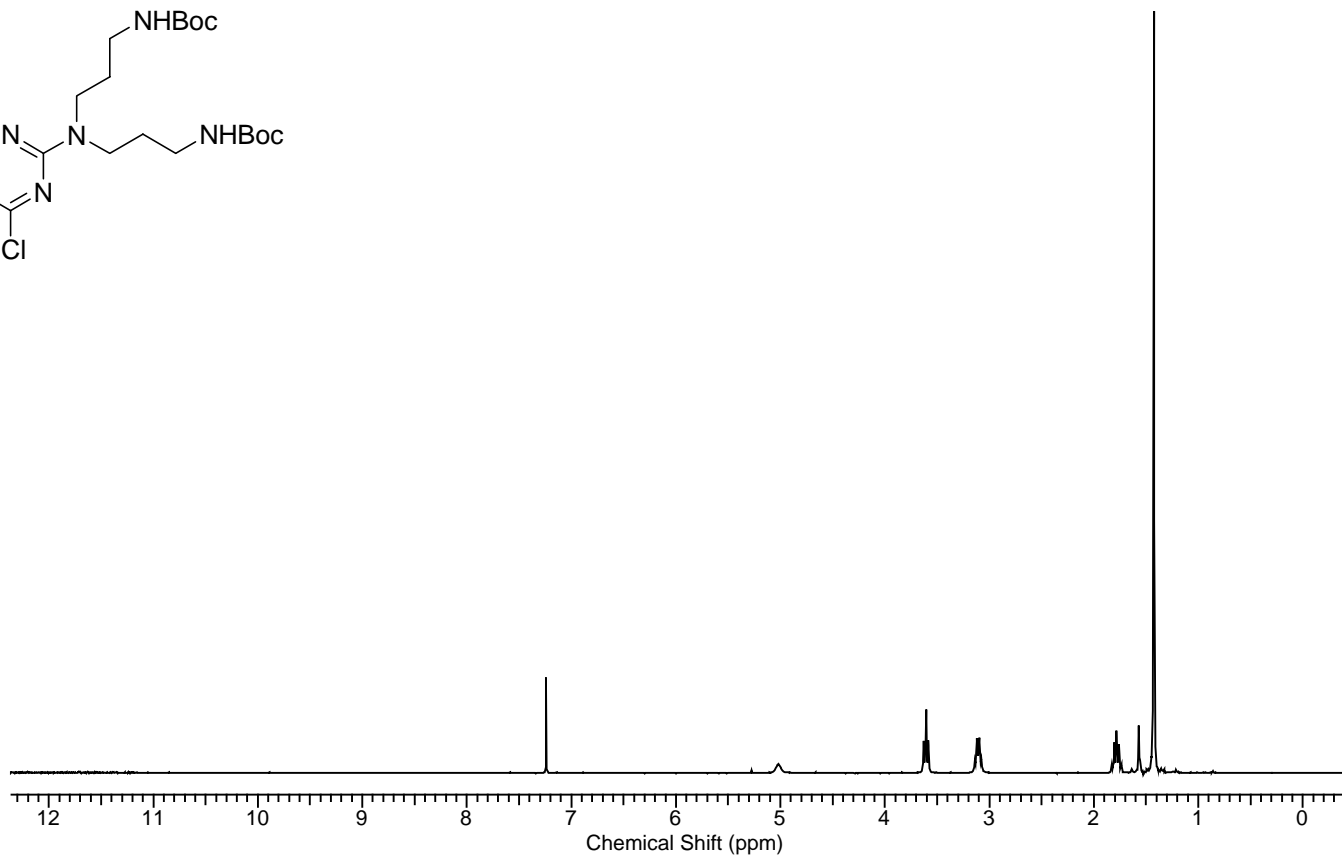

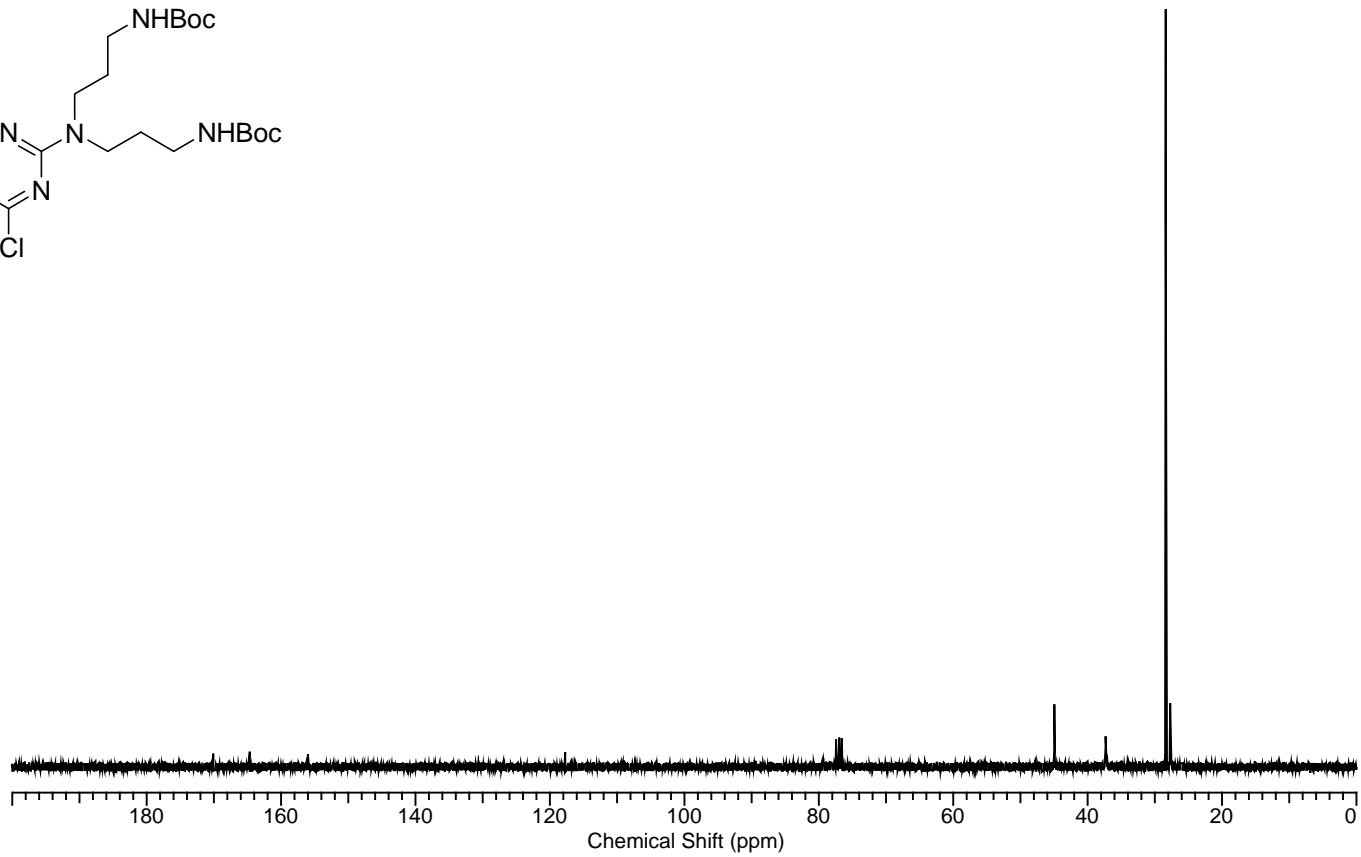

+TOF MS: 0.100 to 0.400 min from 03300615.wiff  
a=3.55282456299366410e-004, t0=4.79905611886024420e+001

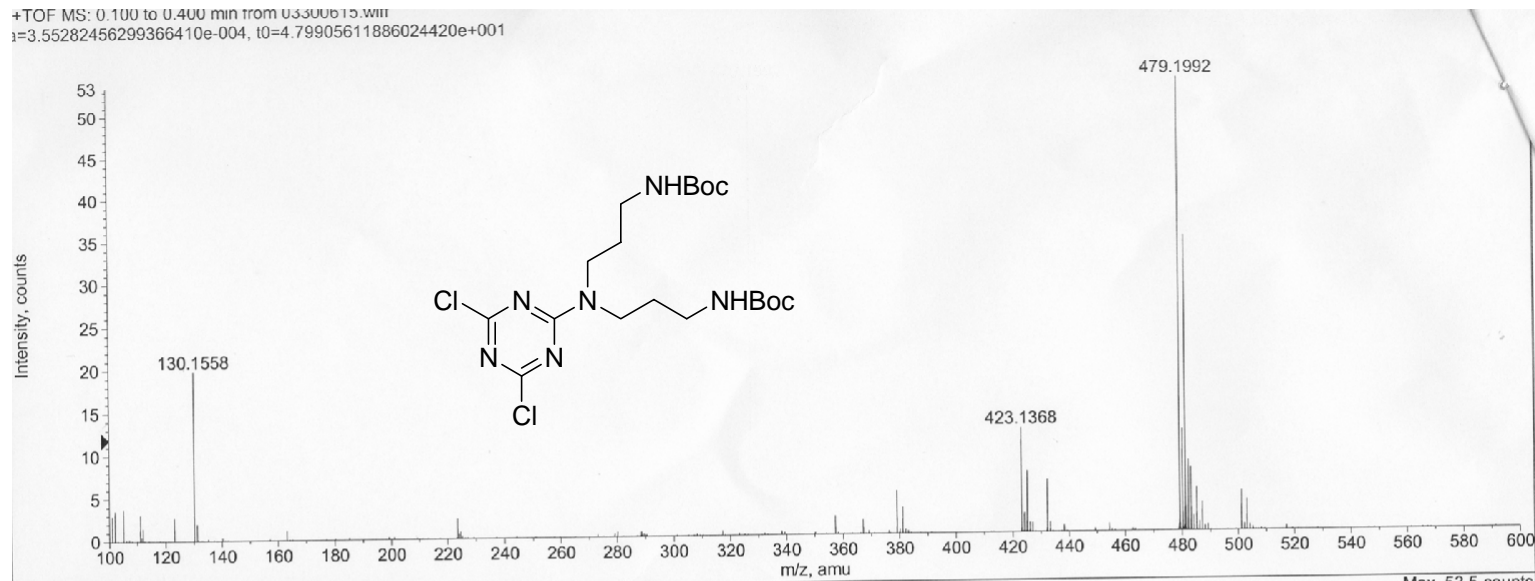

+TOF MS: 0.100 to 0.400 min from 03300615.wiff  
a=3.55282456299366410e-004, t0=4.79905611886024420e+001

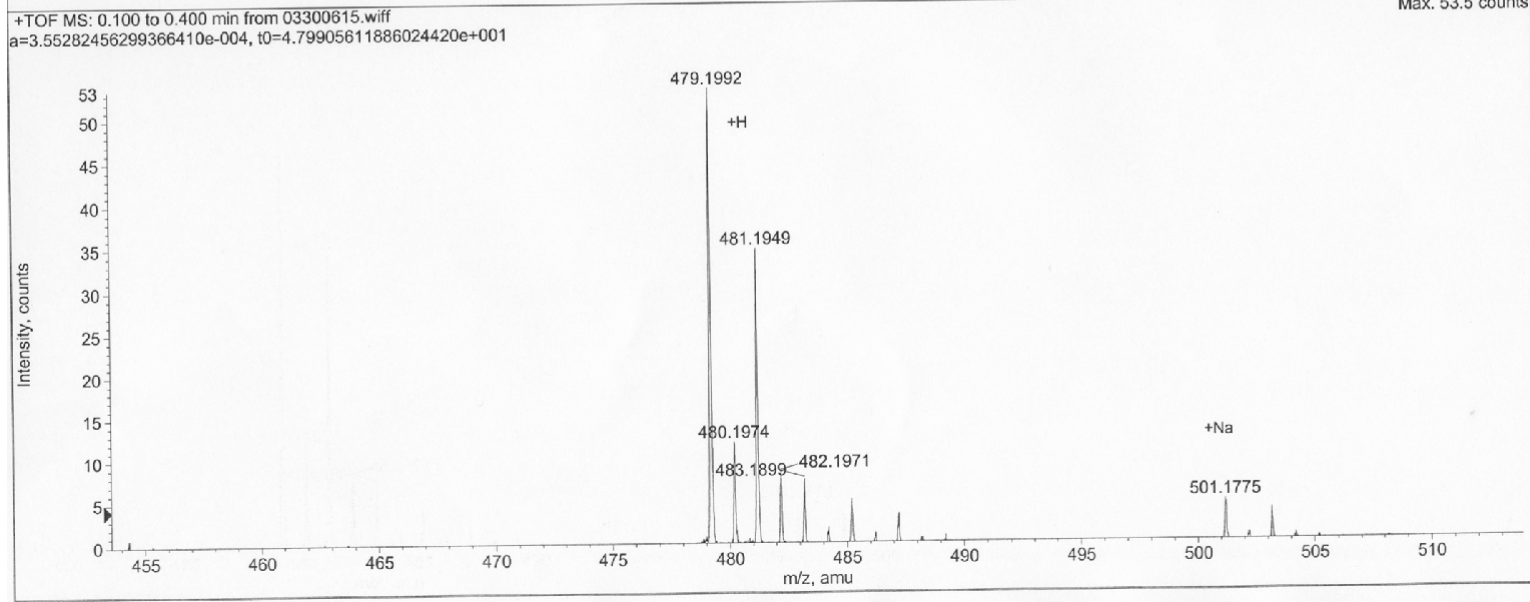

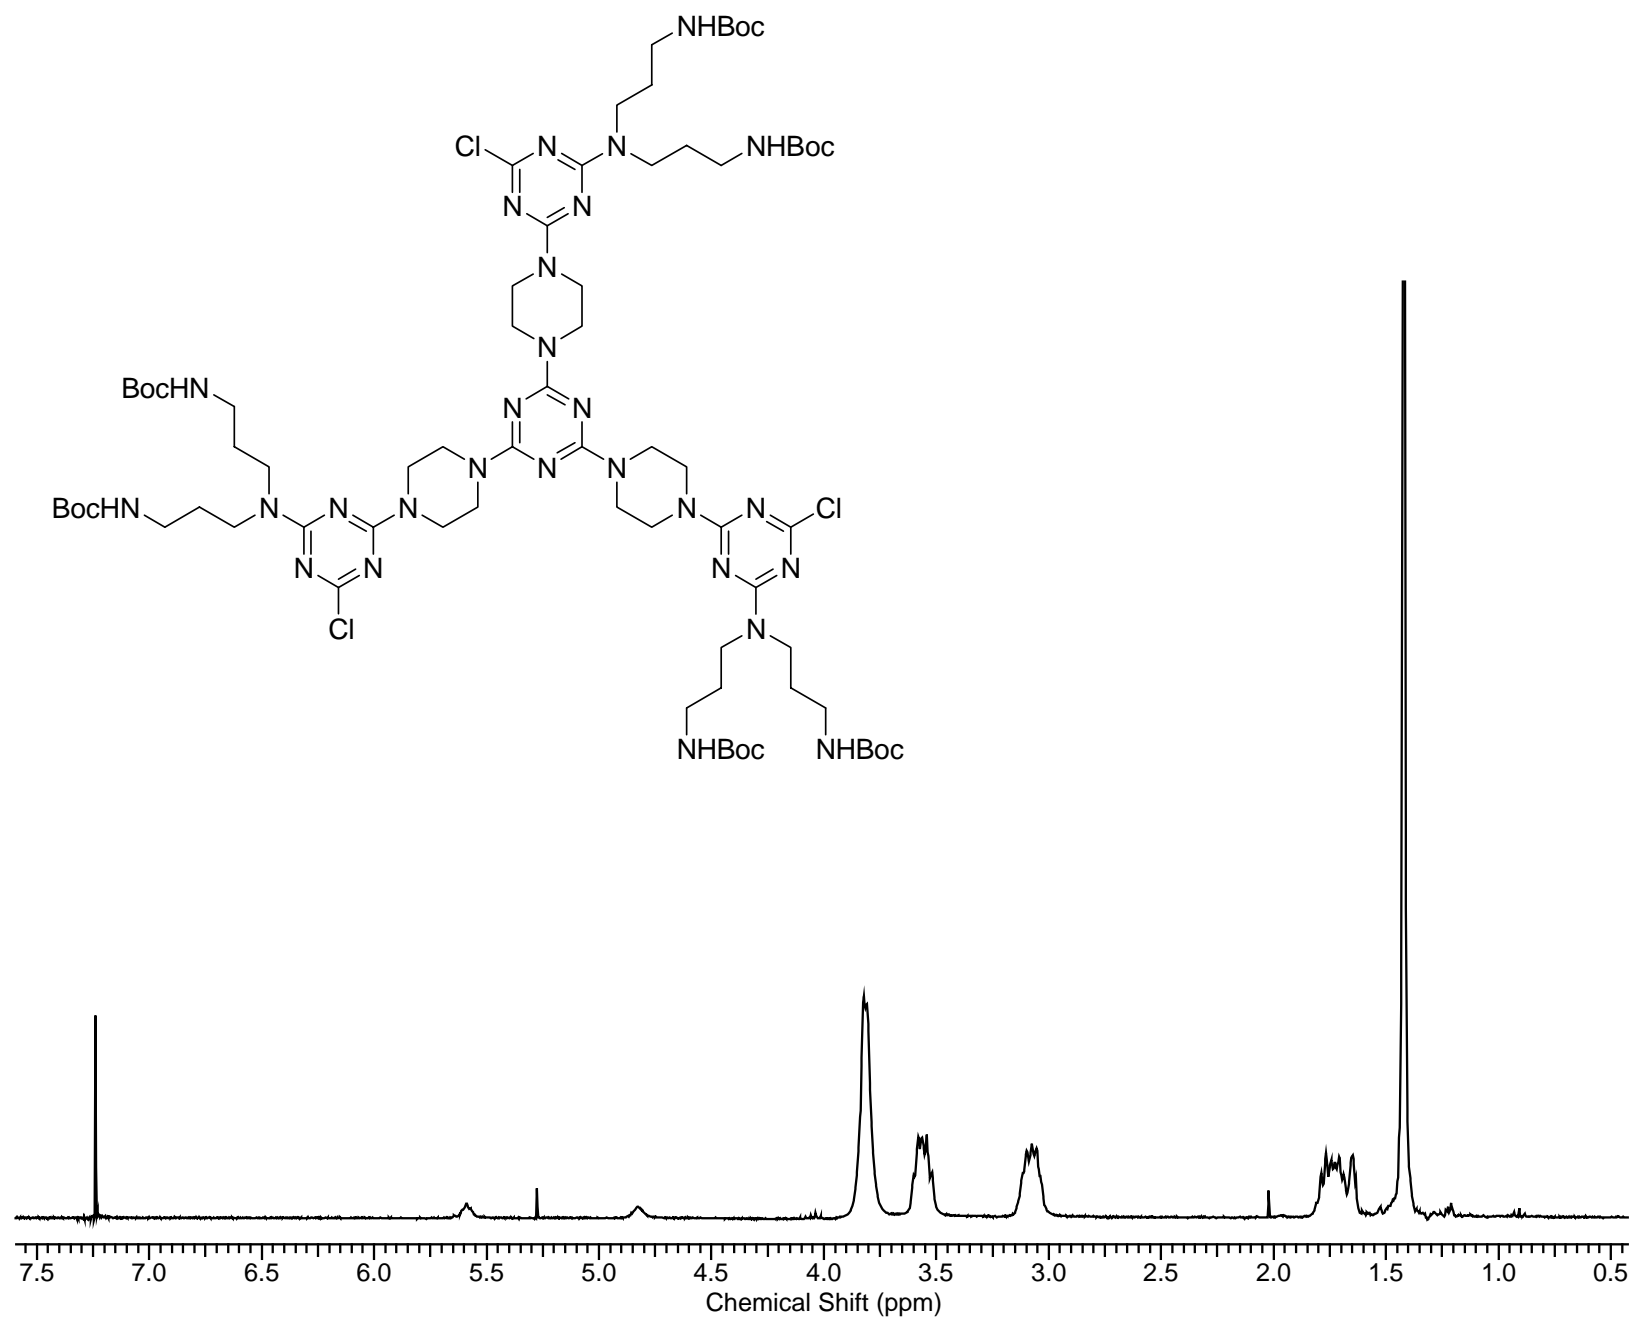

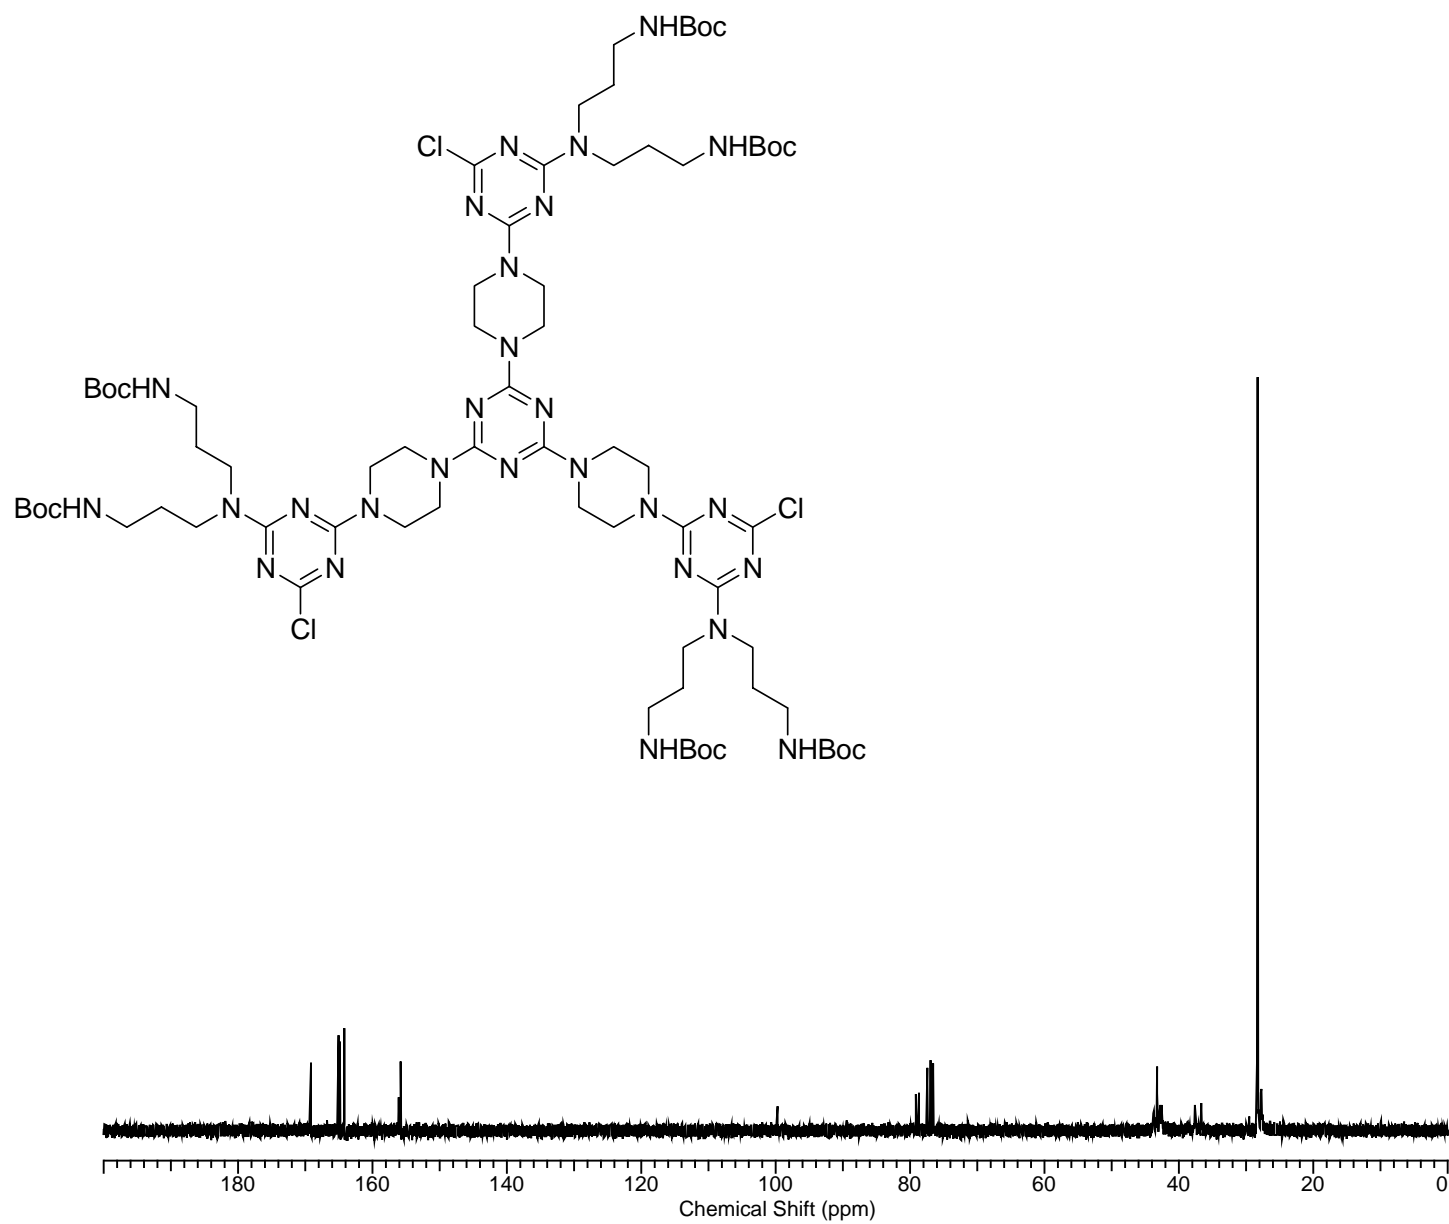



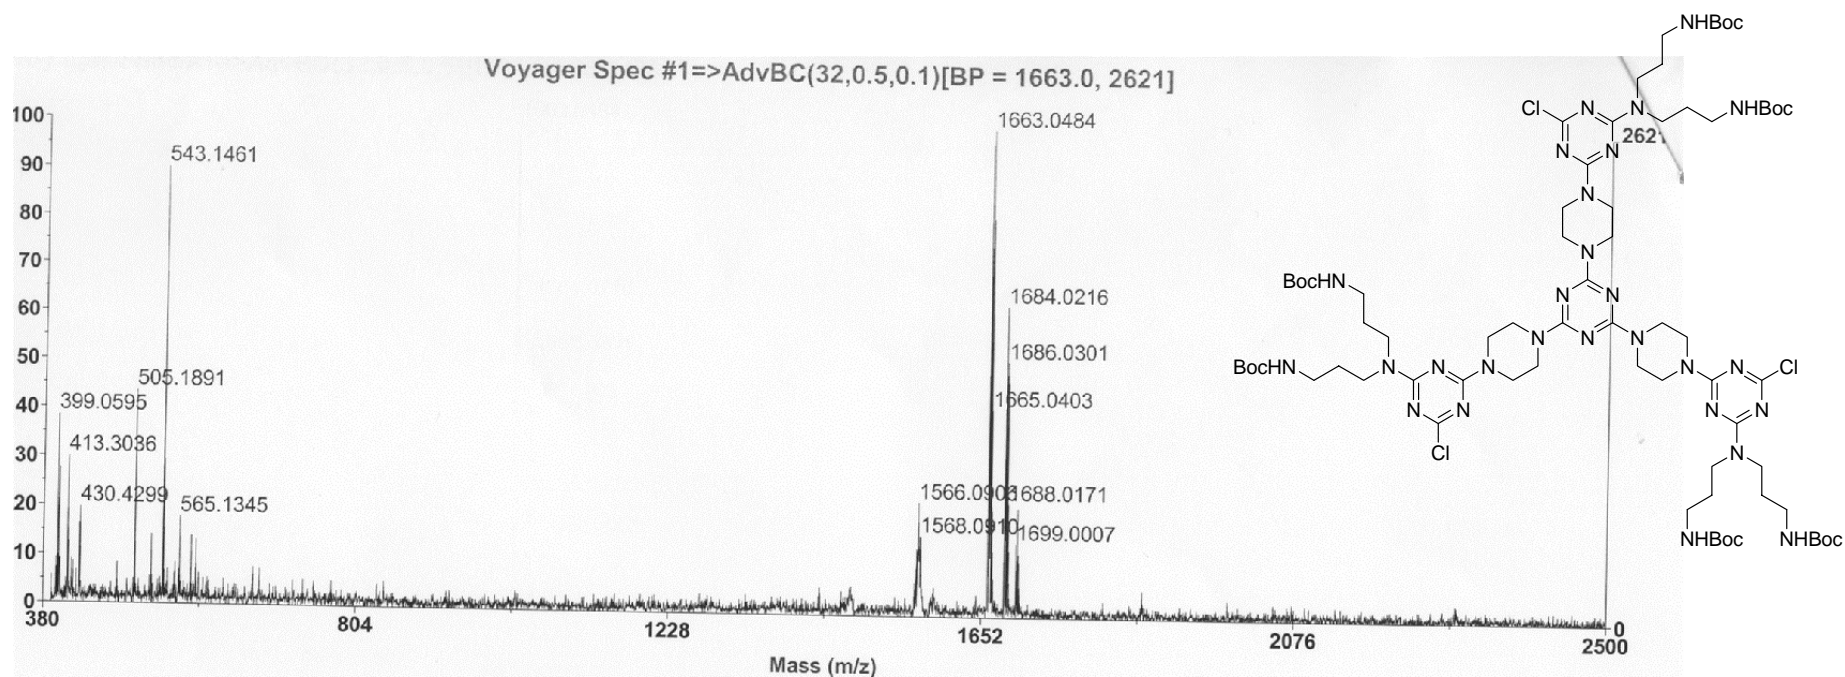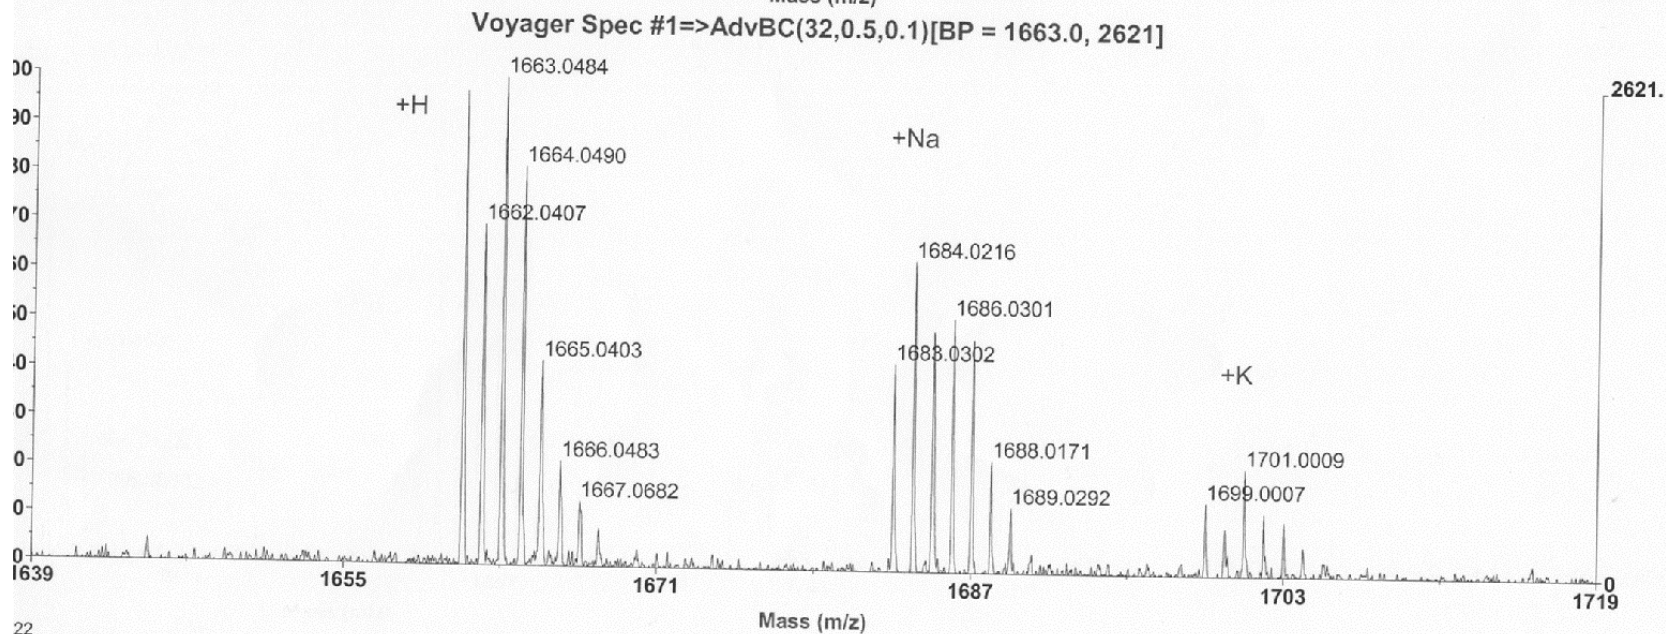

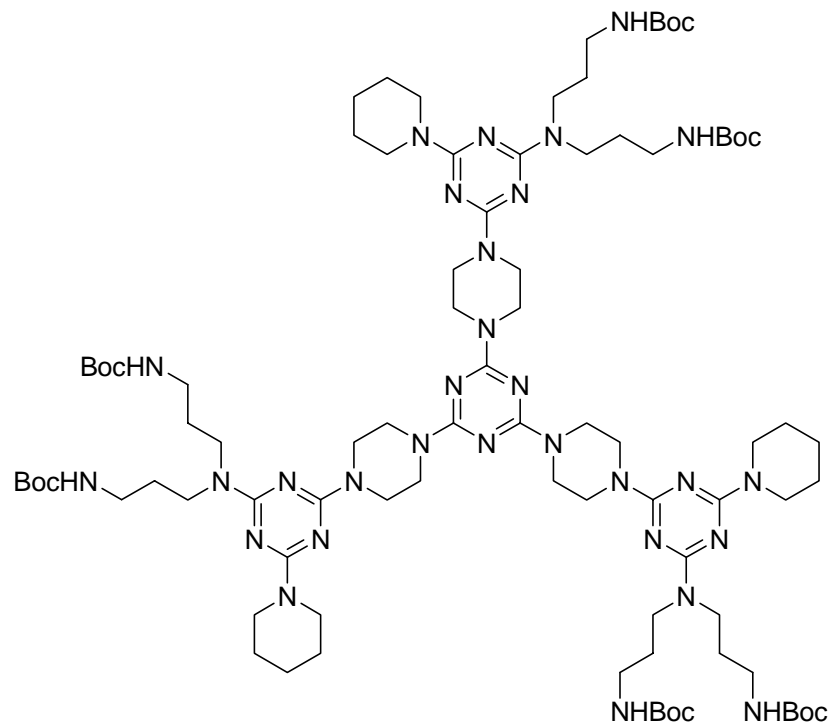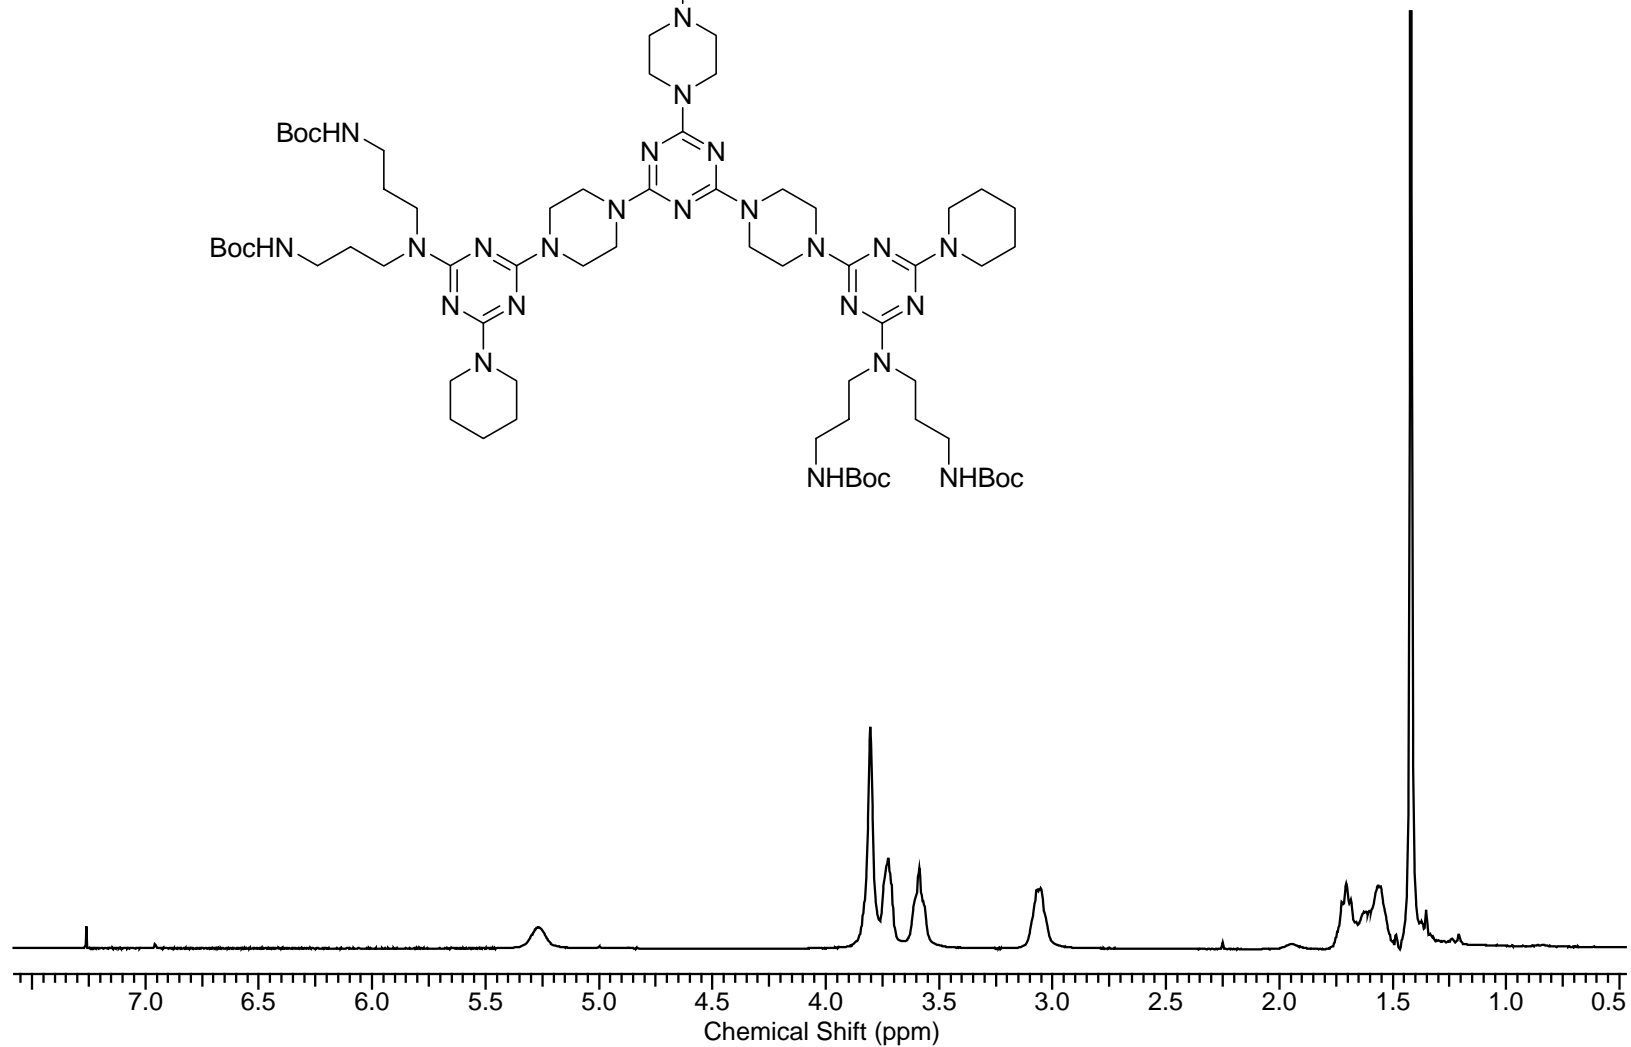

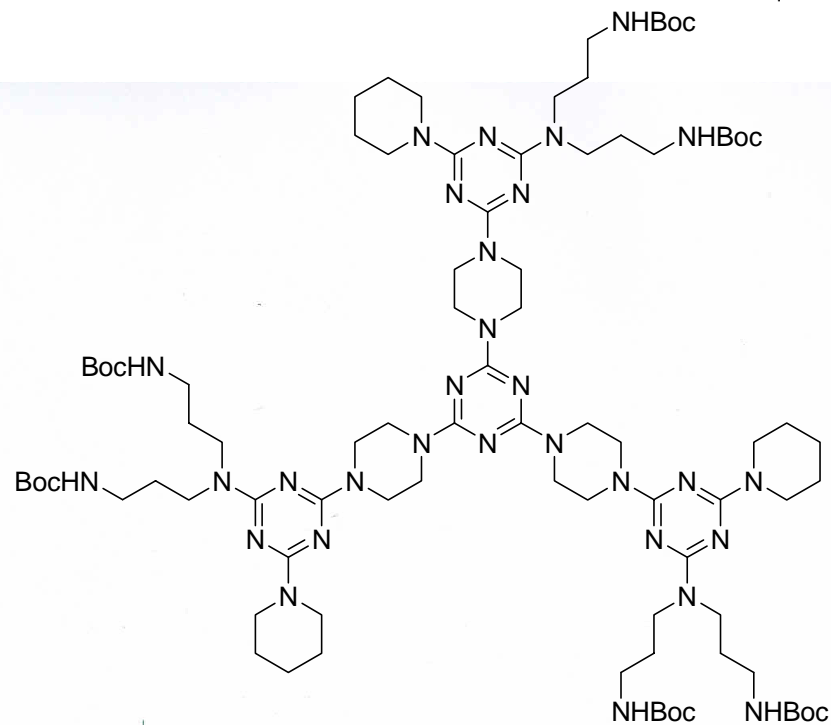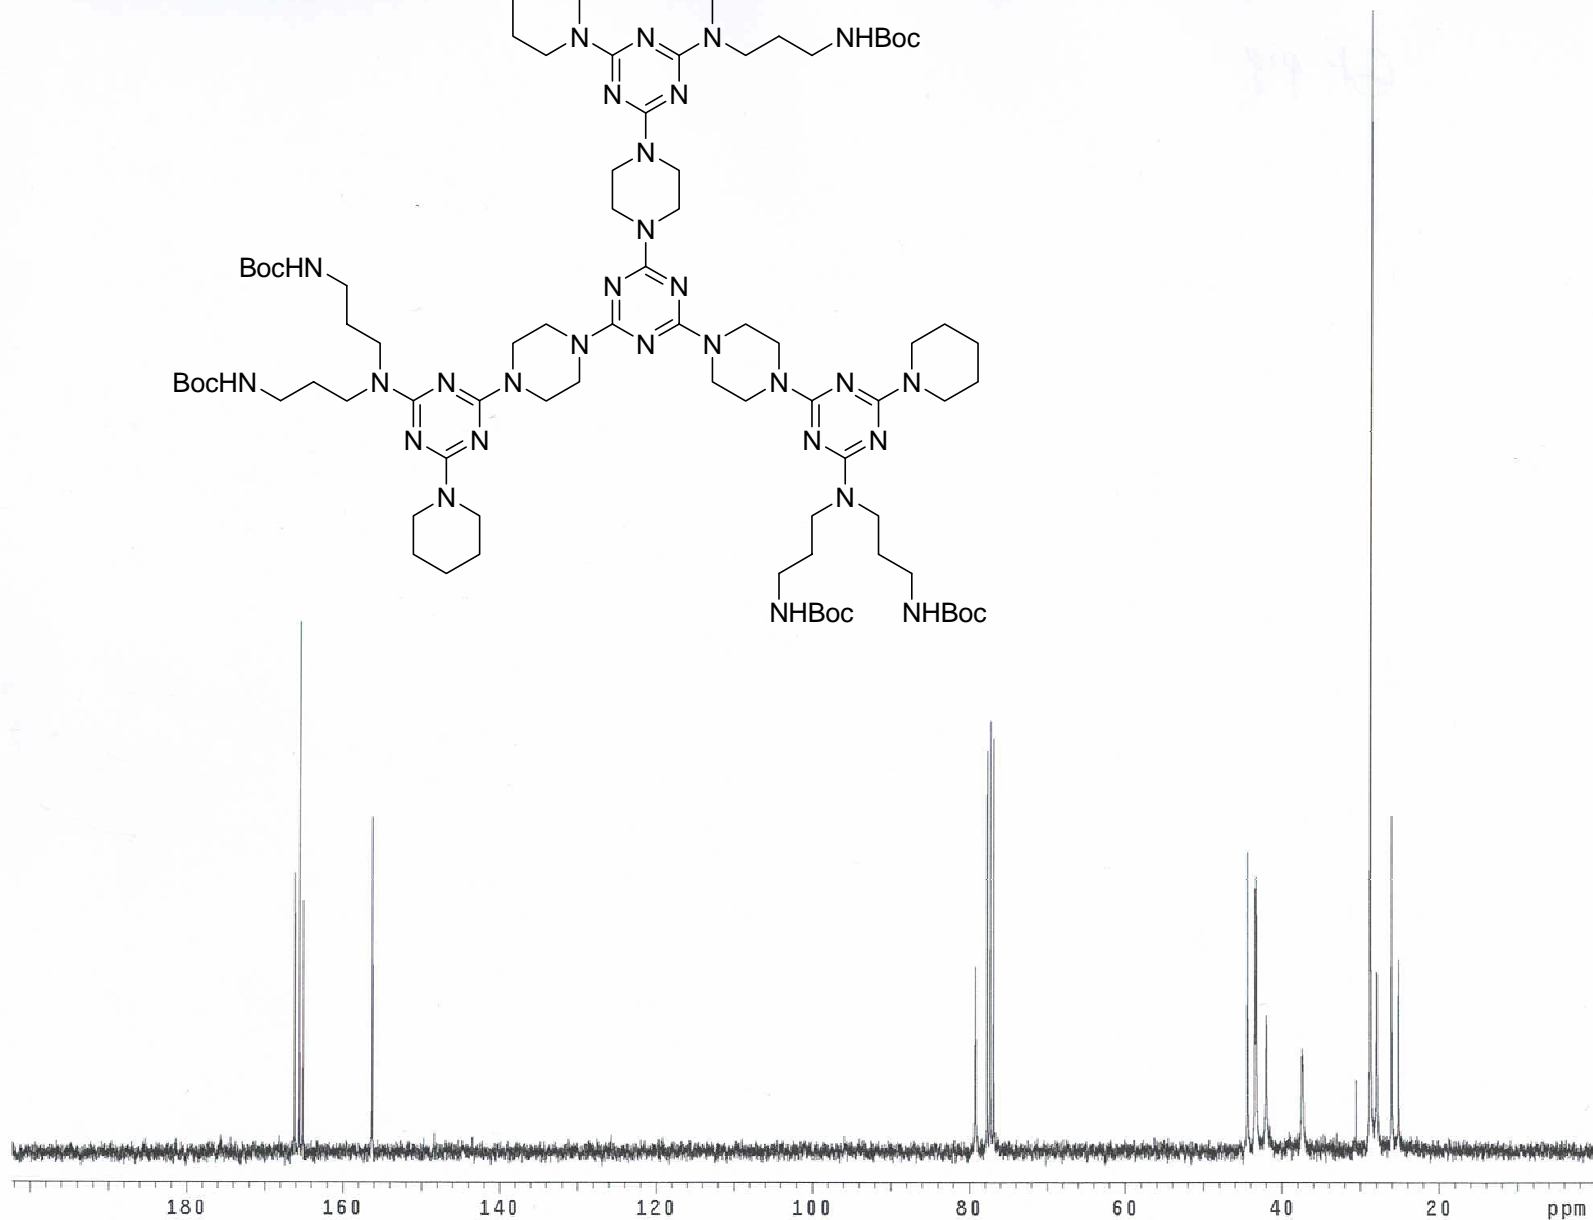

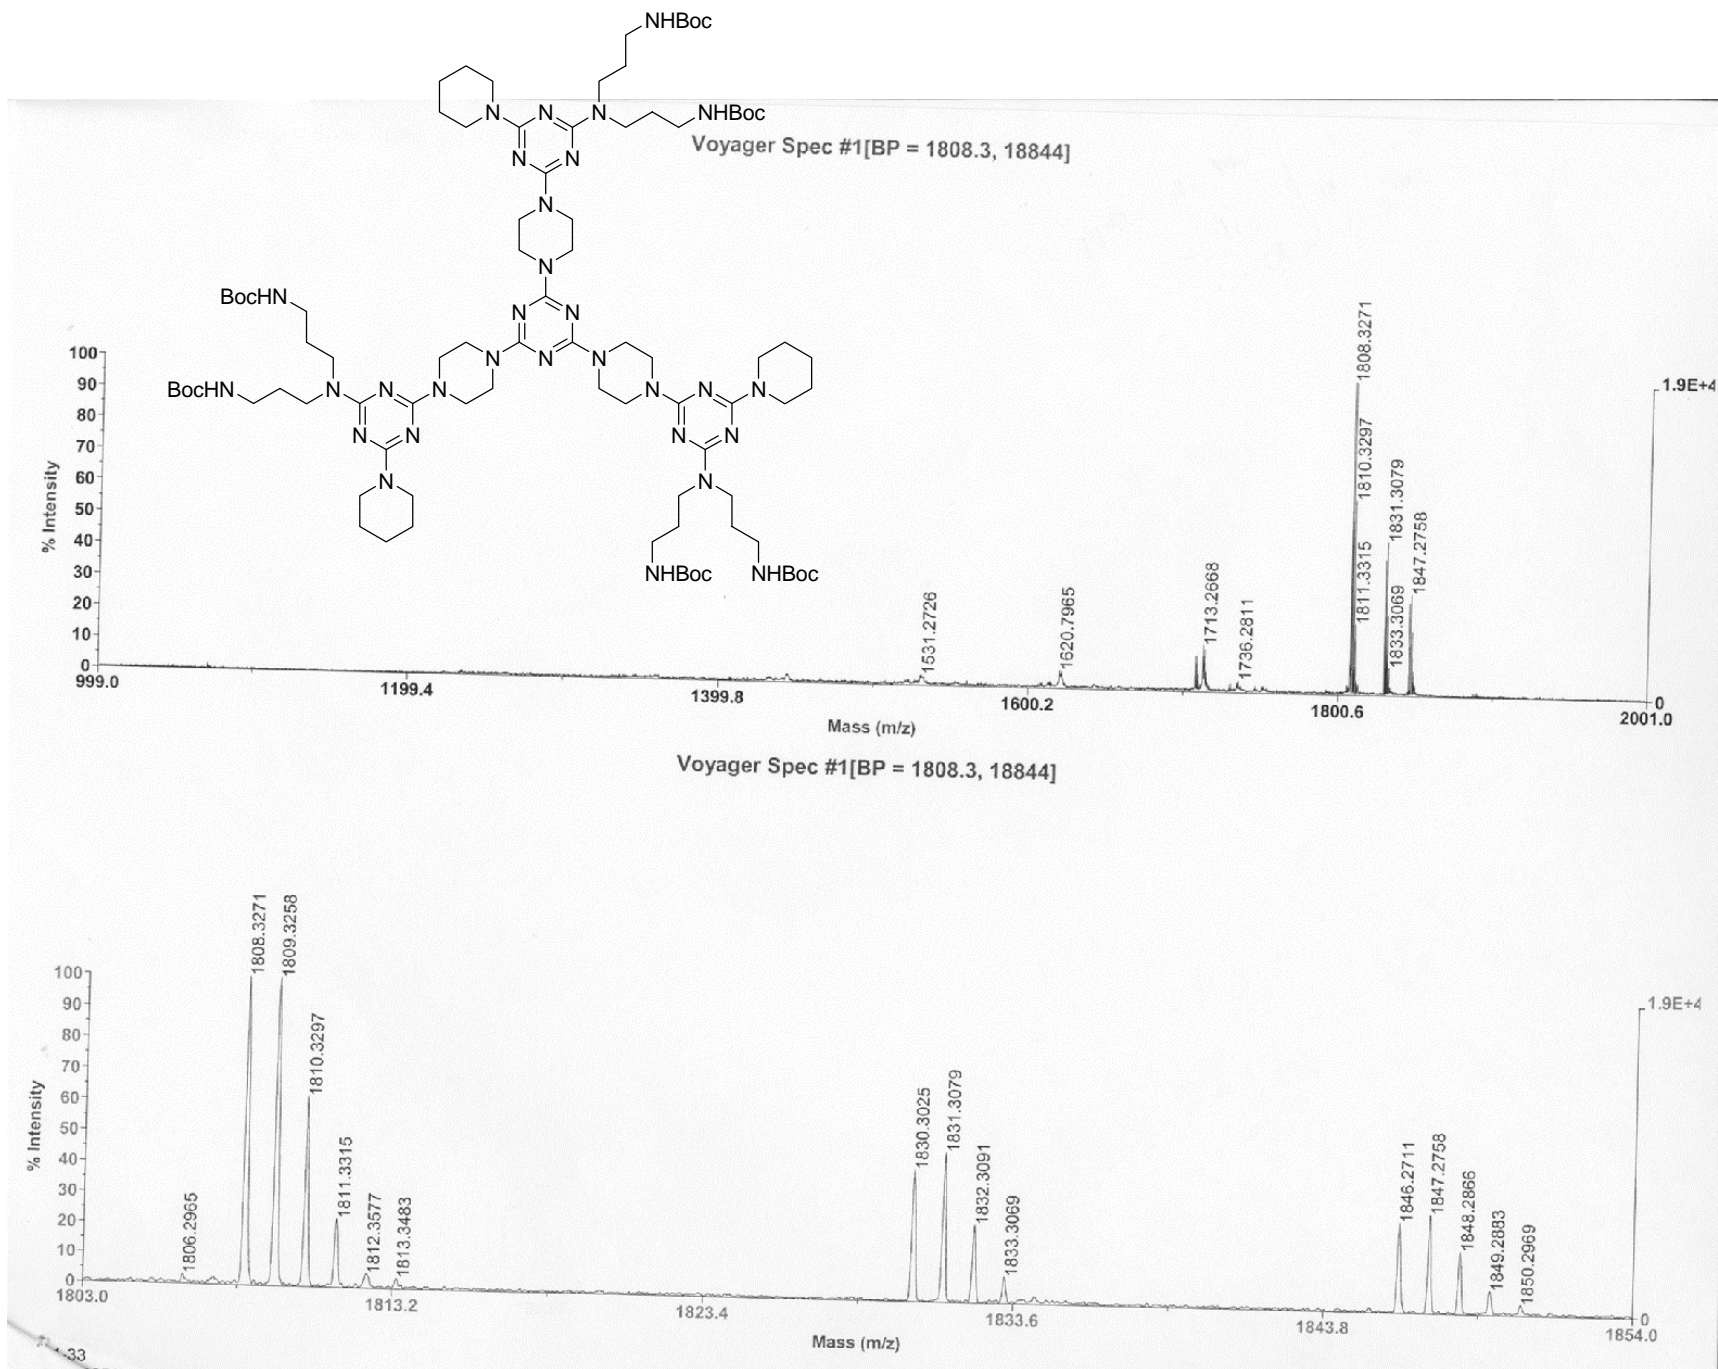

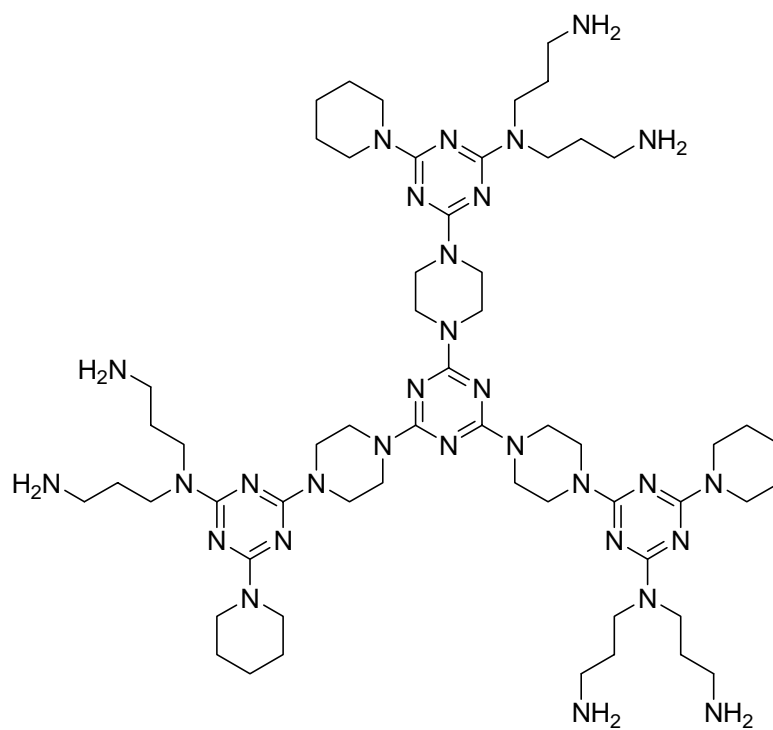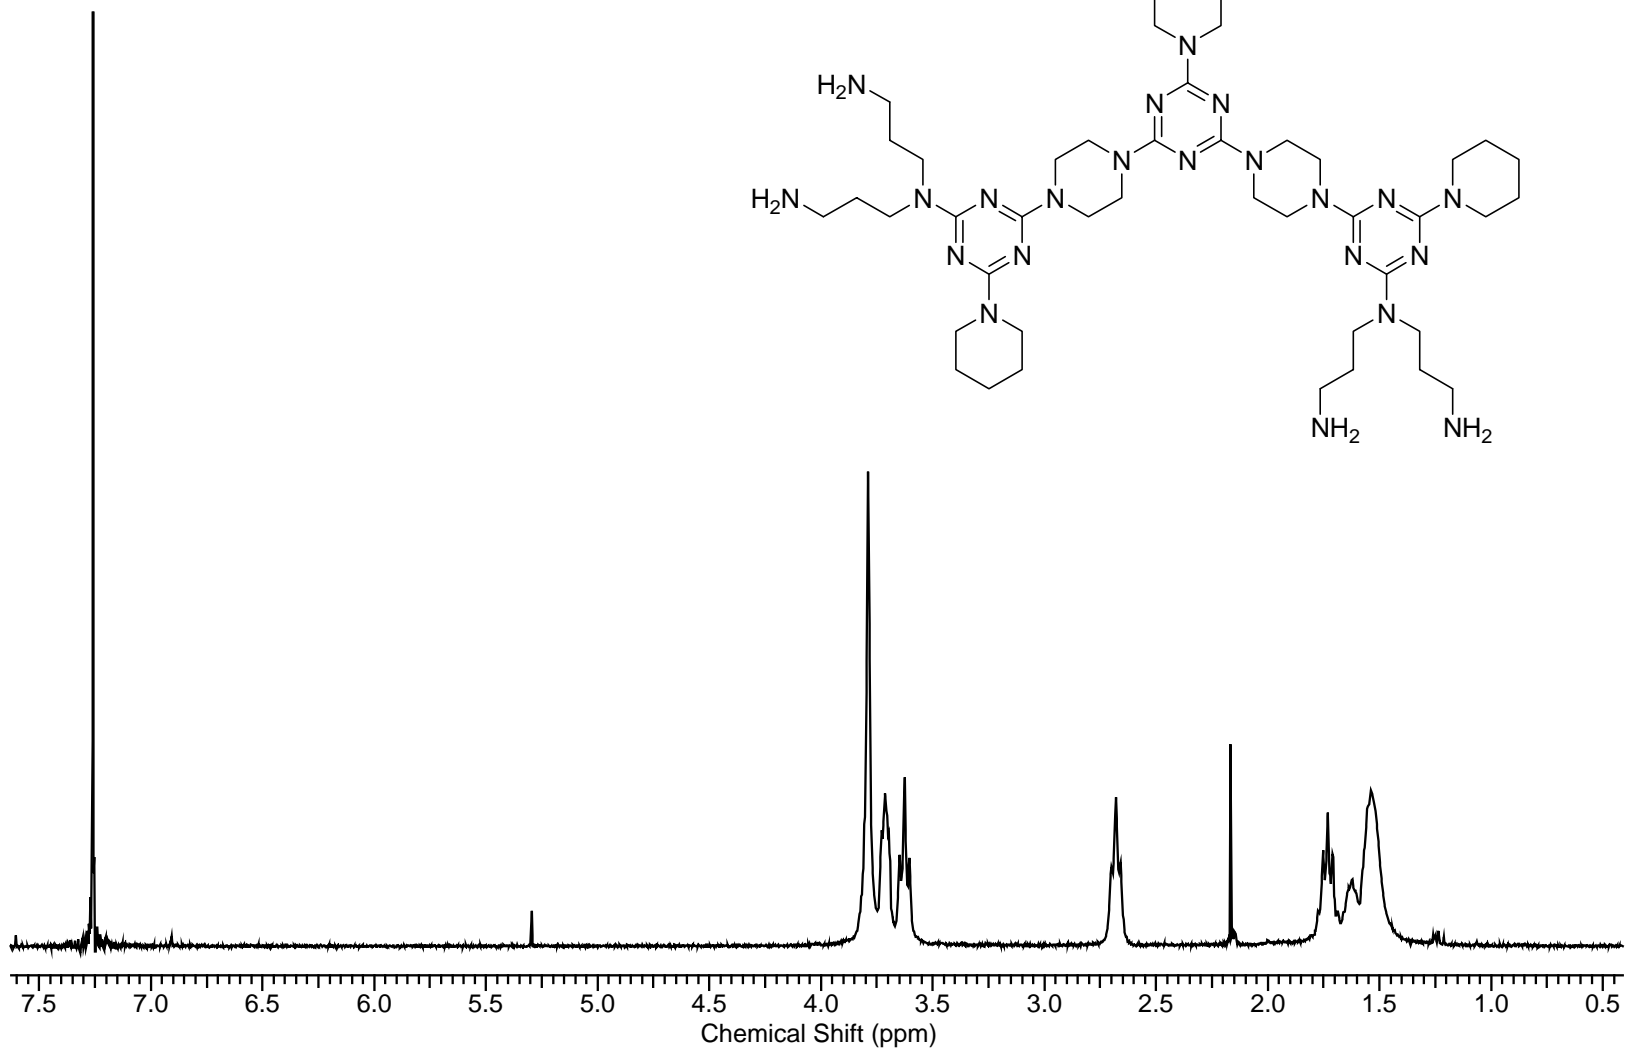



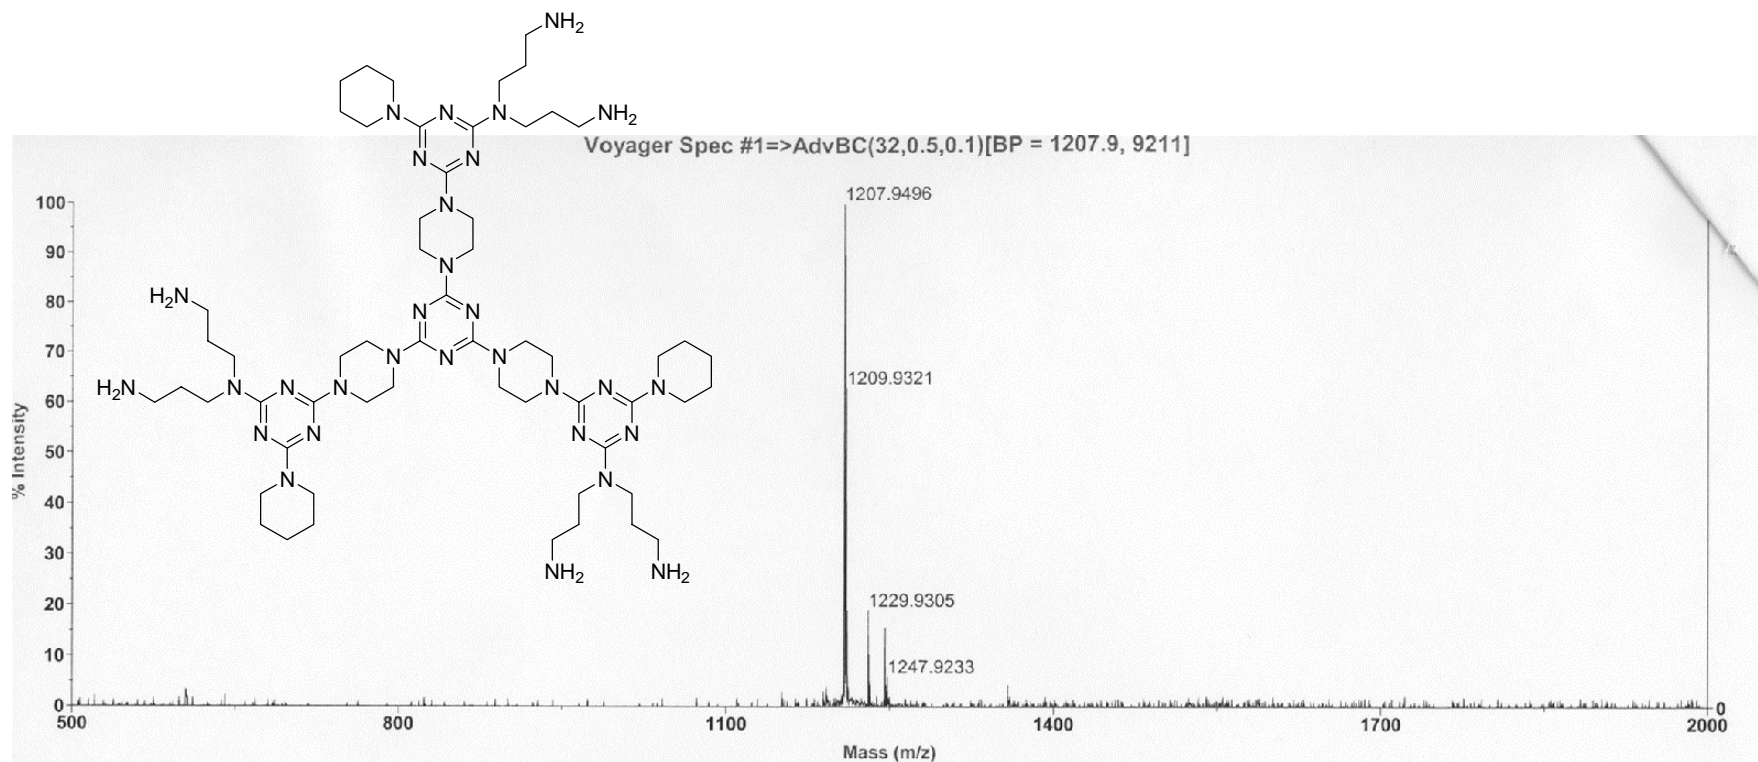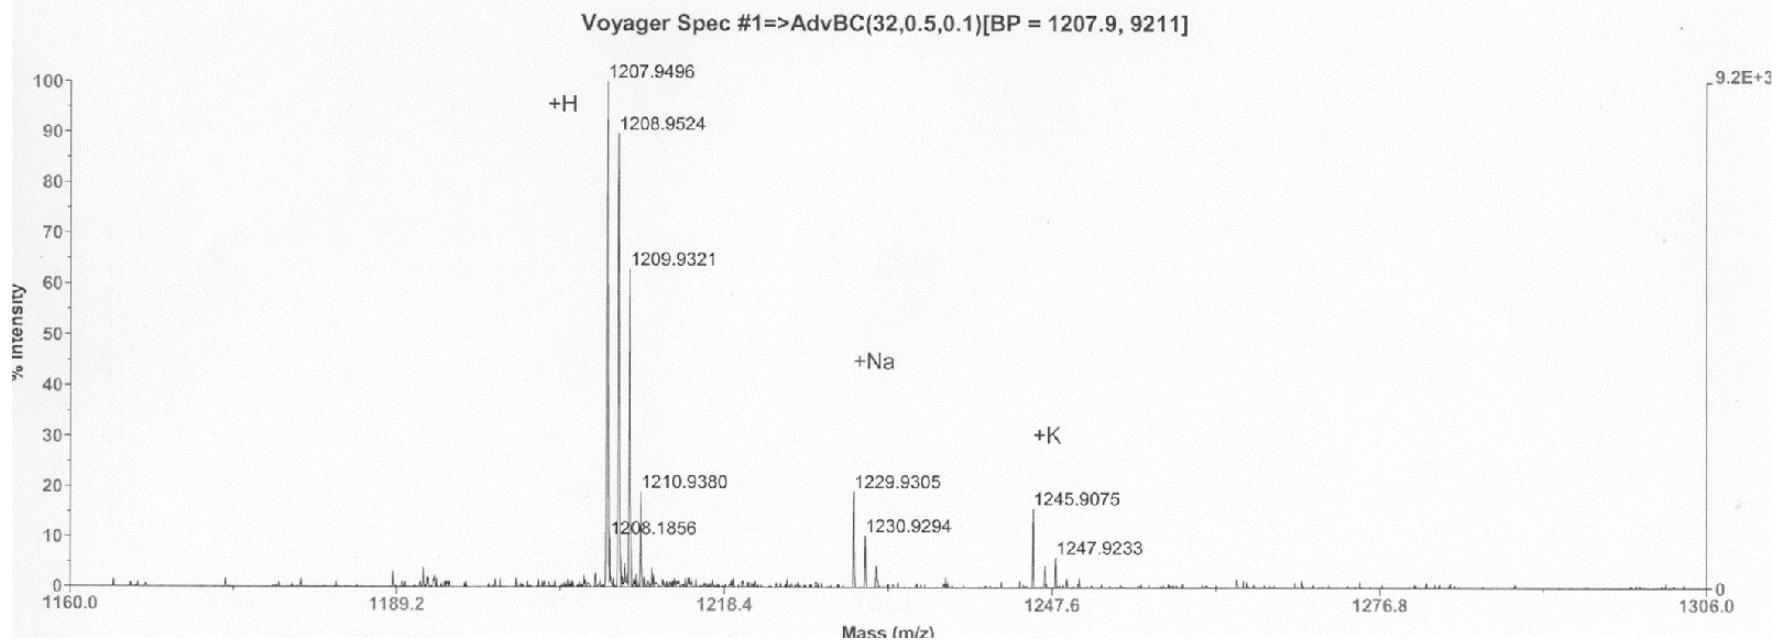

# G1 NMRs

G1-NH2\_10-9H

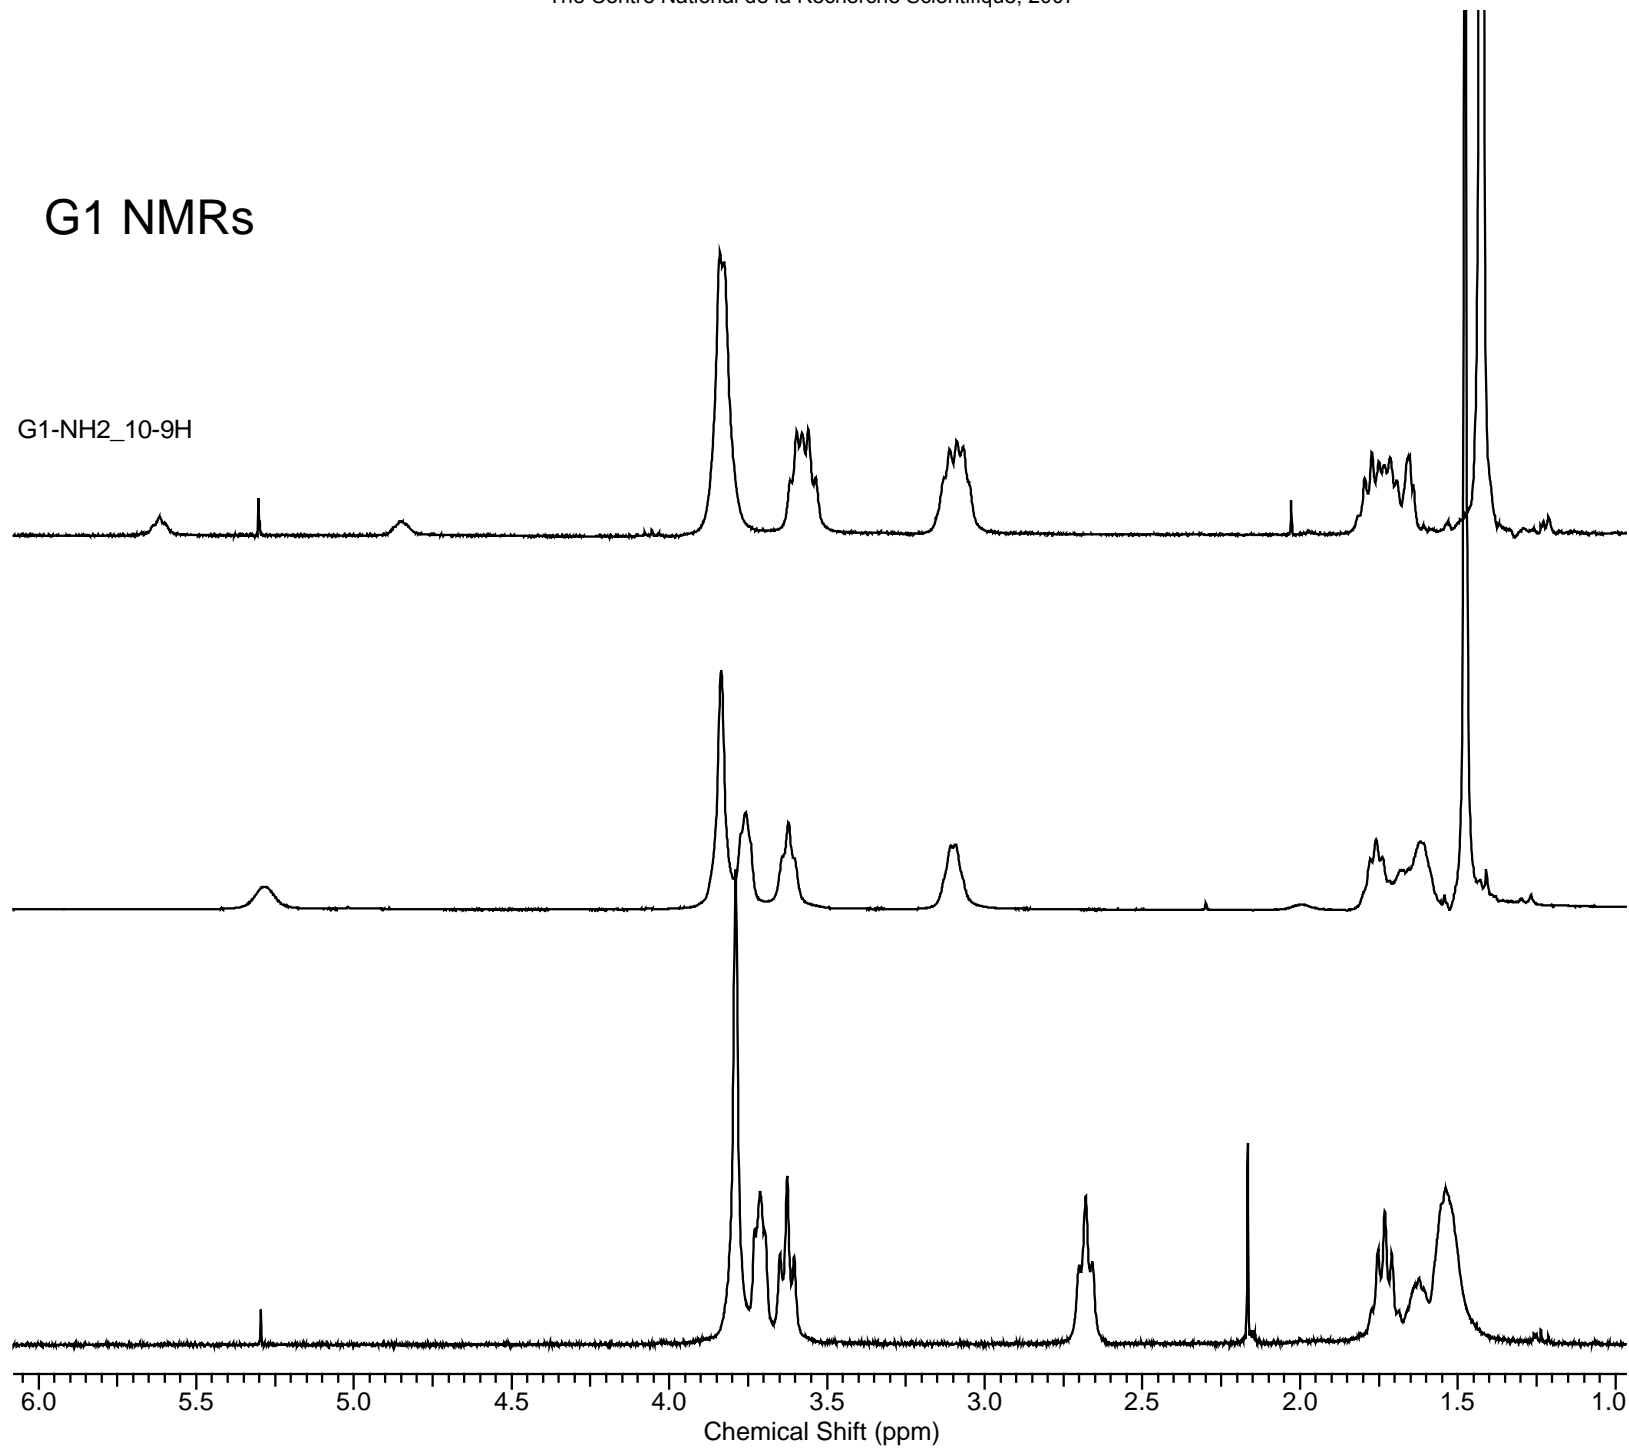



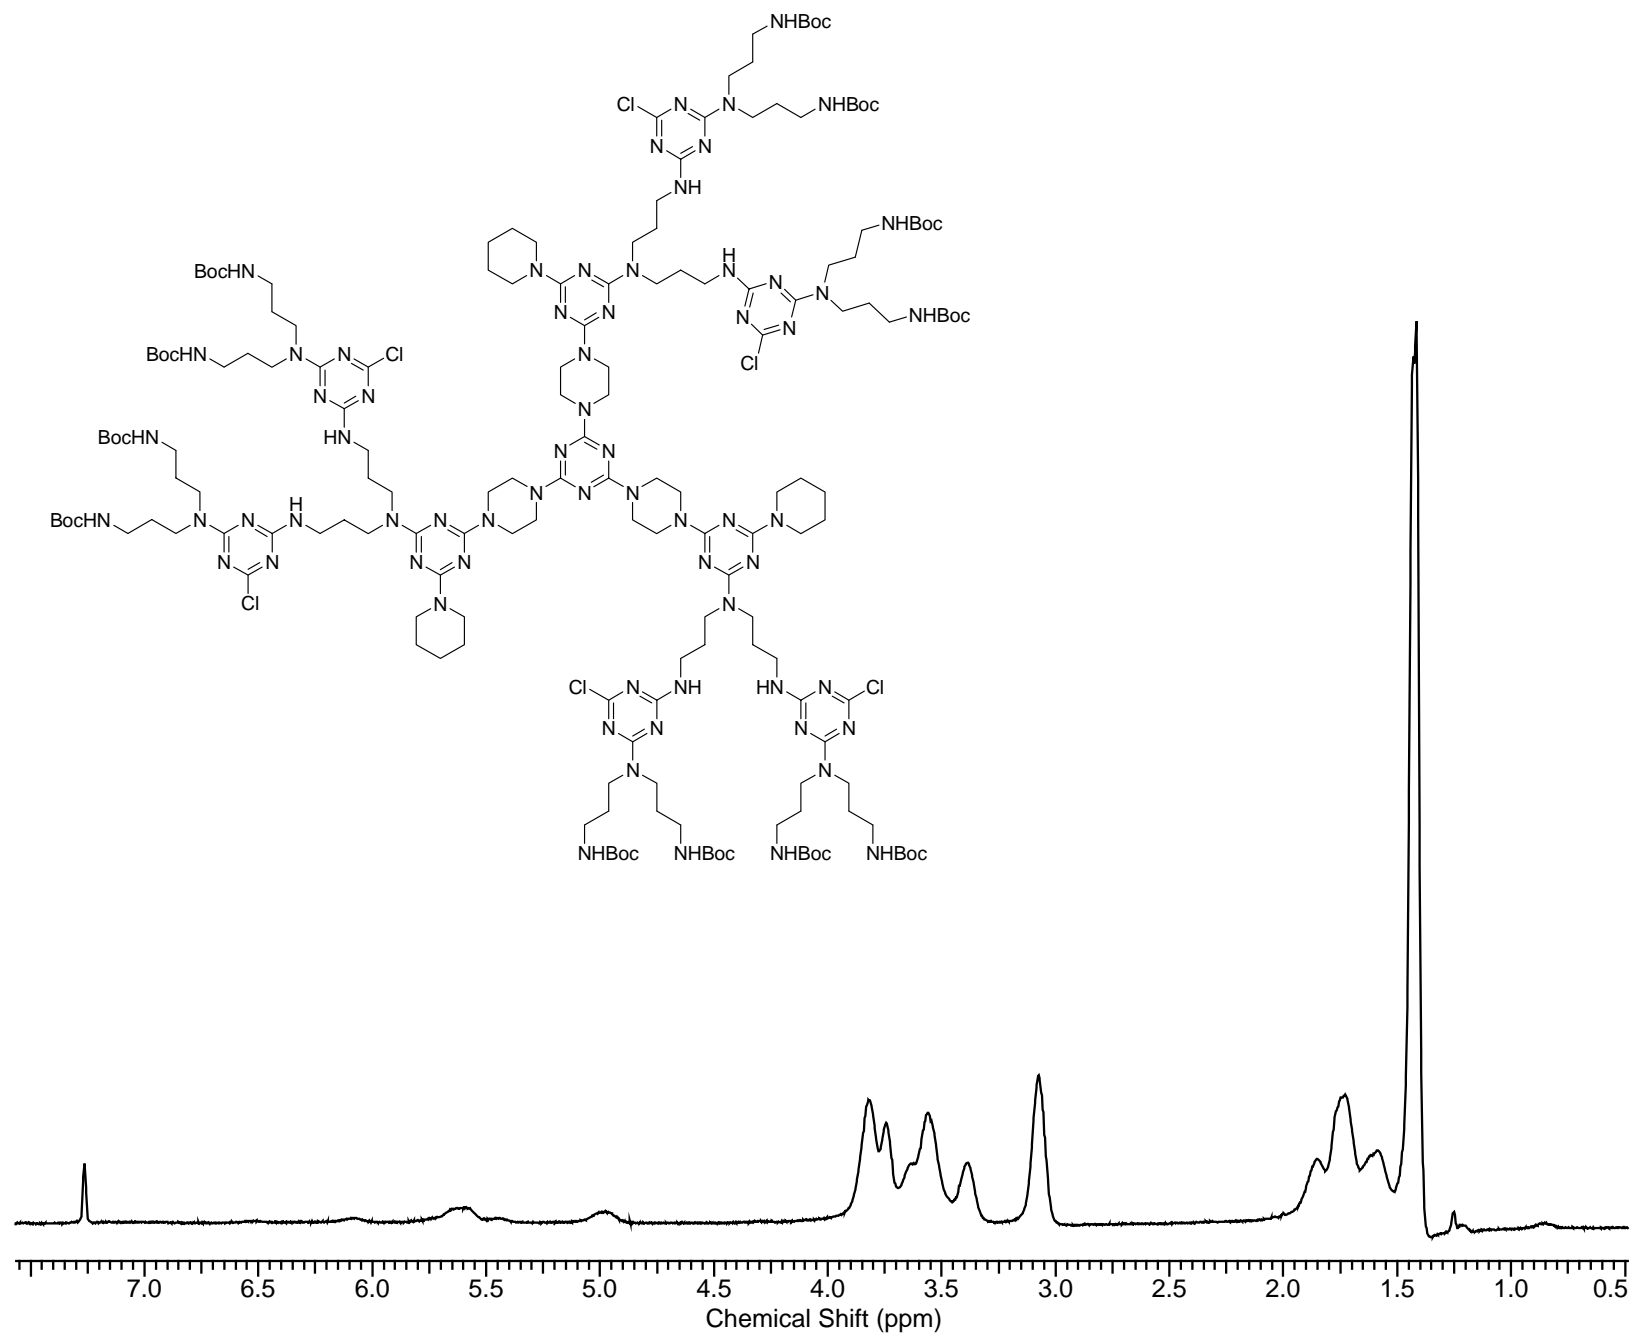

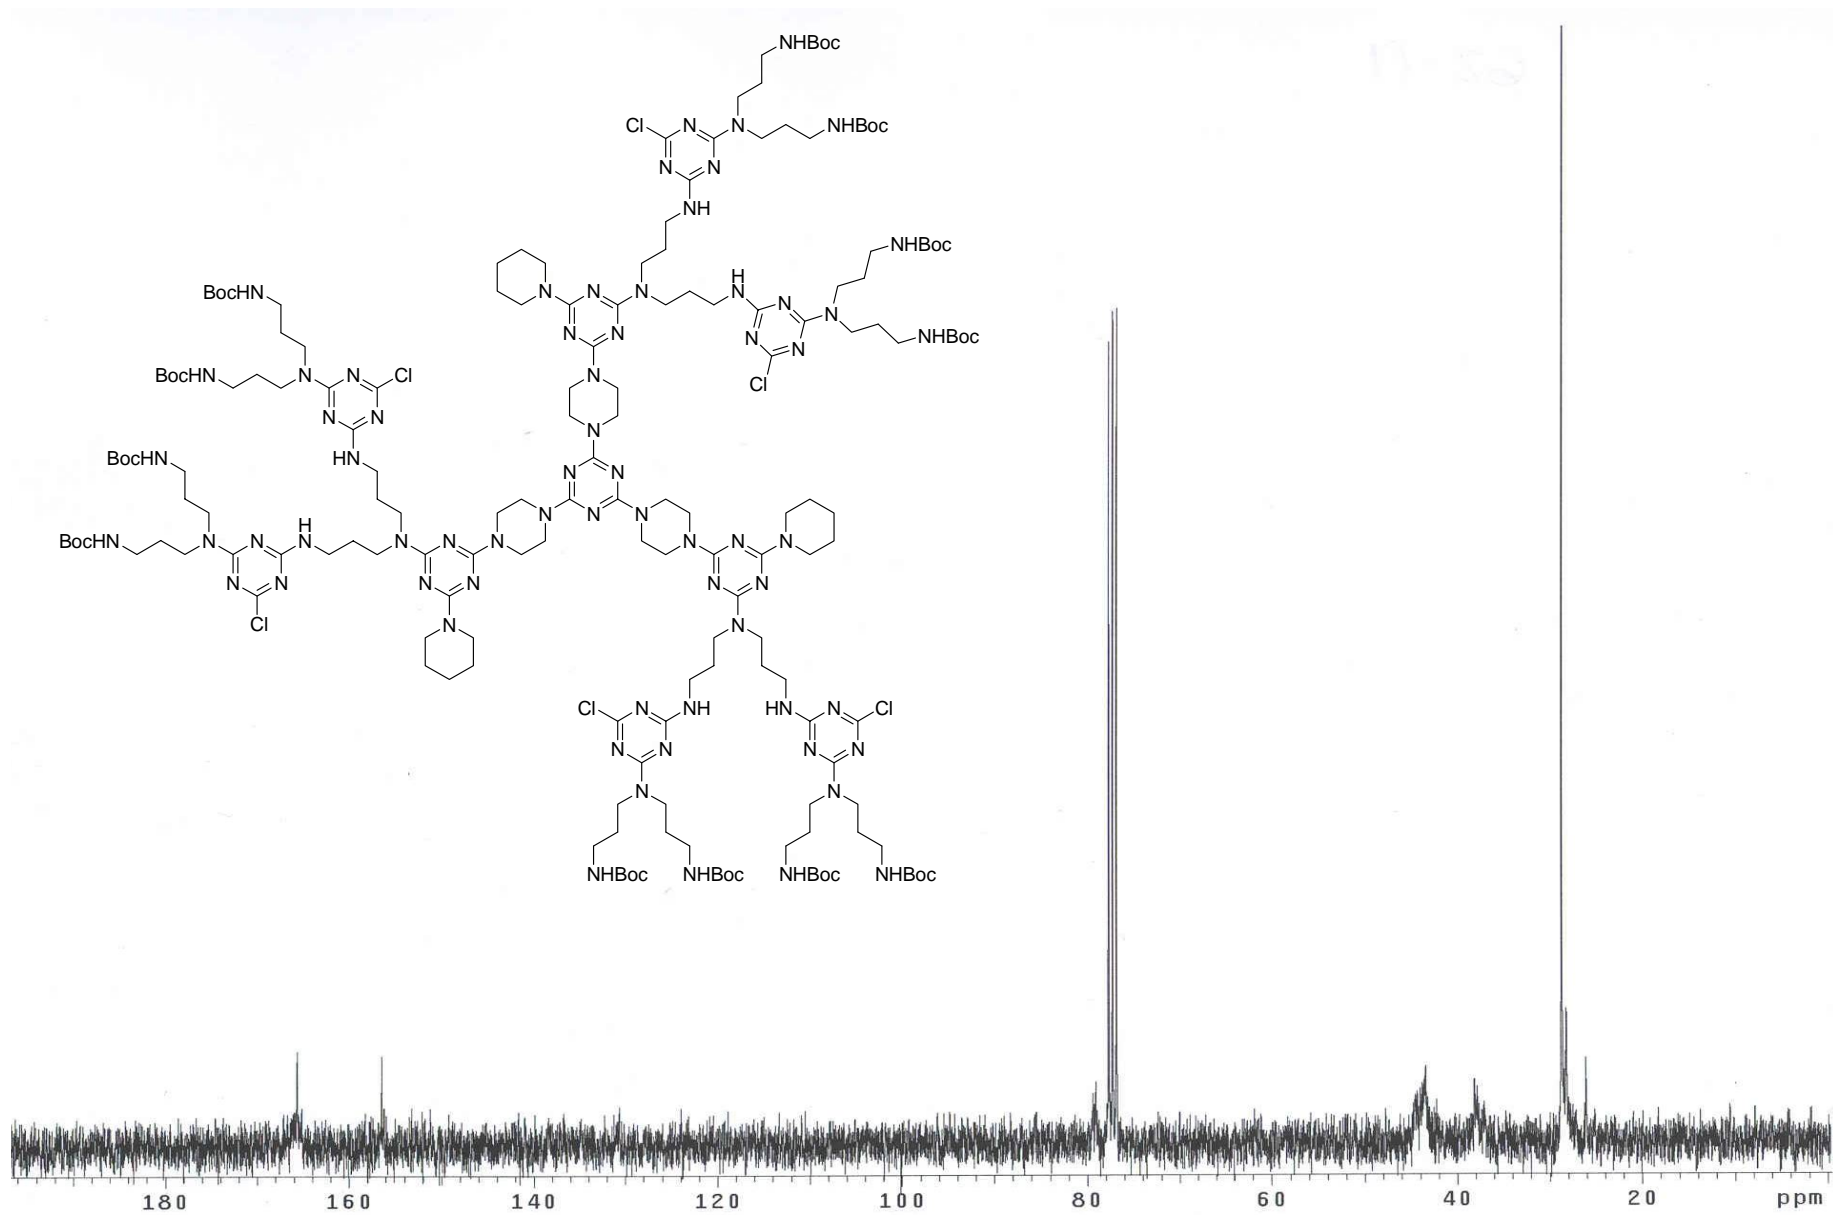

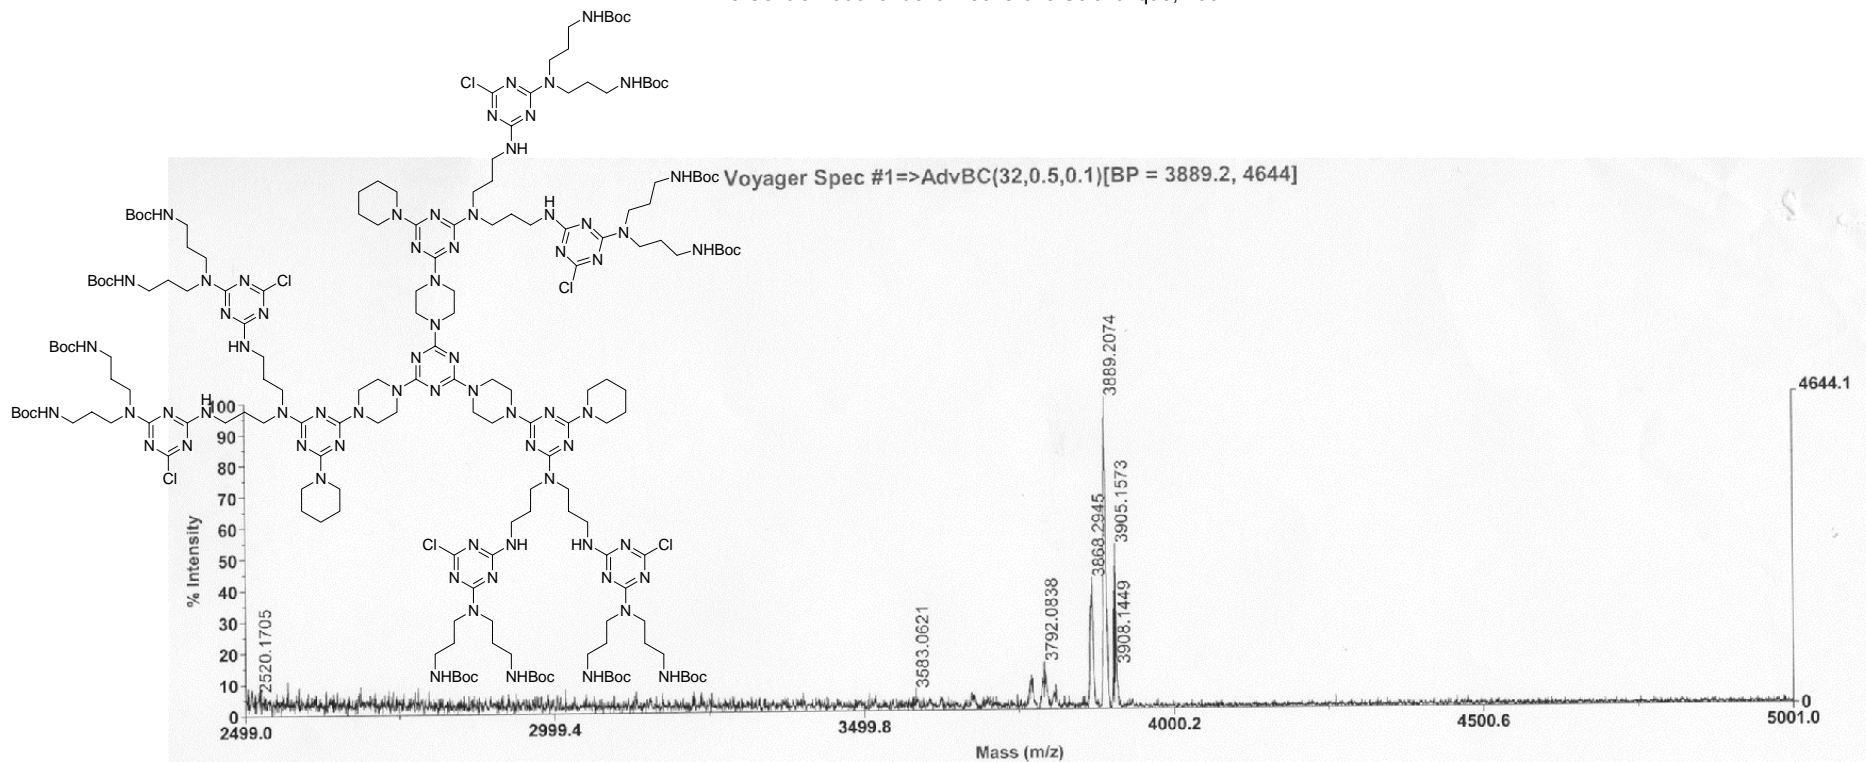

Voyager Spec #1=>AdvBC(32,0.5,0.1)[BP = 3889.2, 4644]

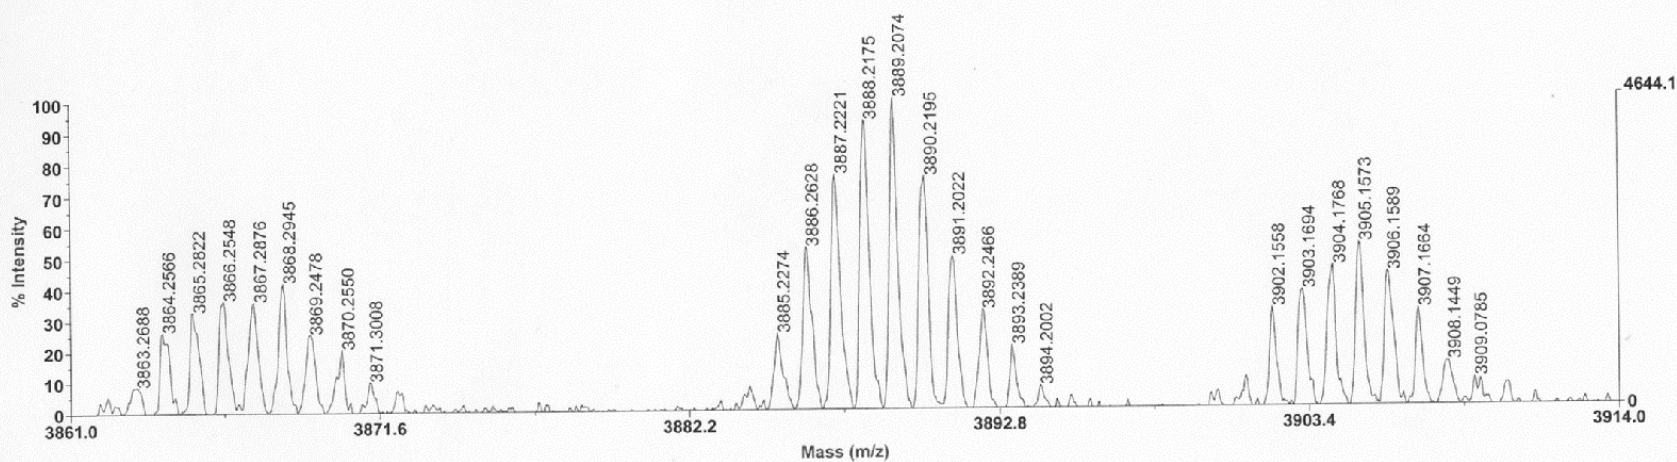

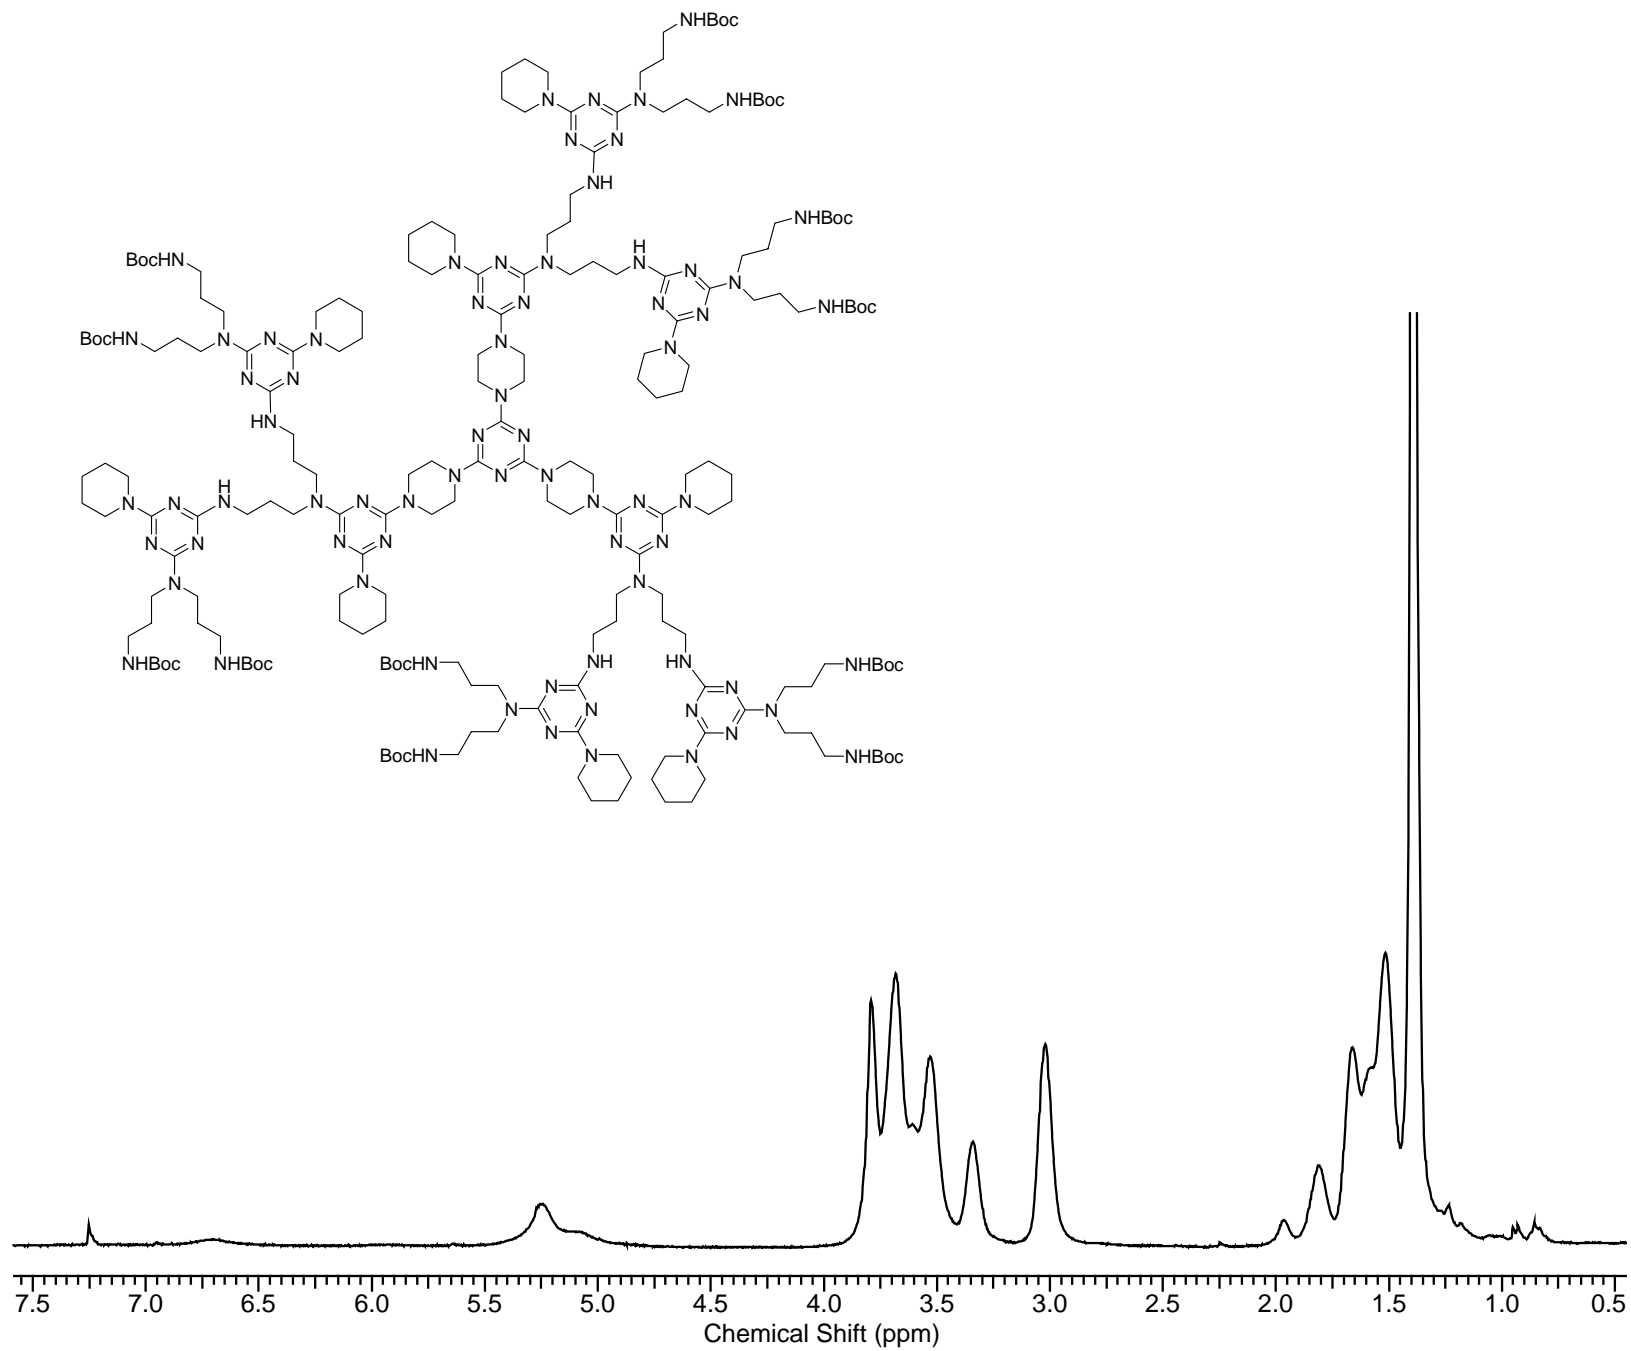

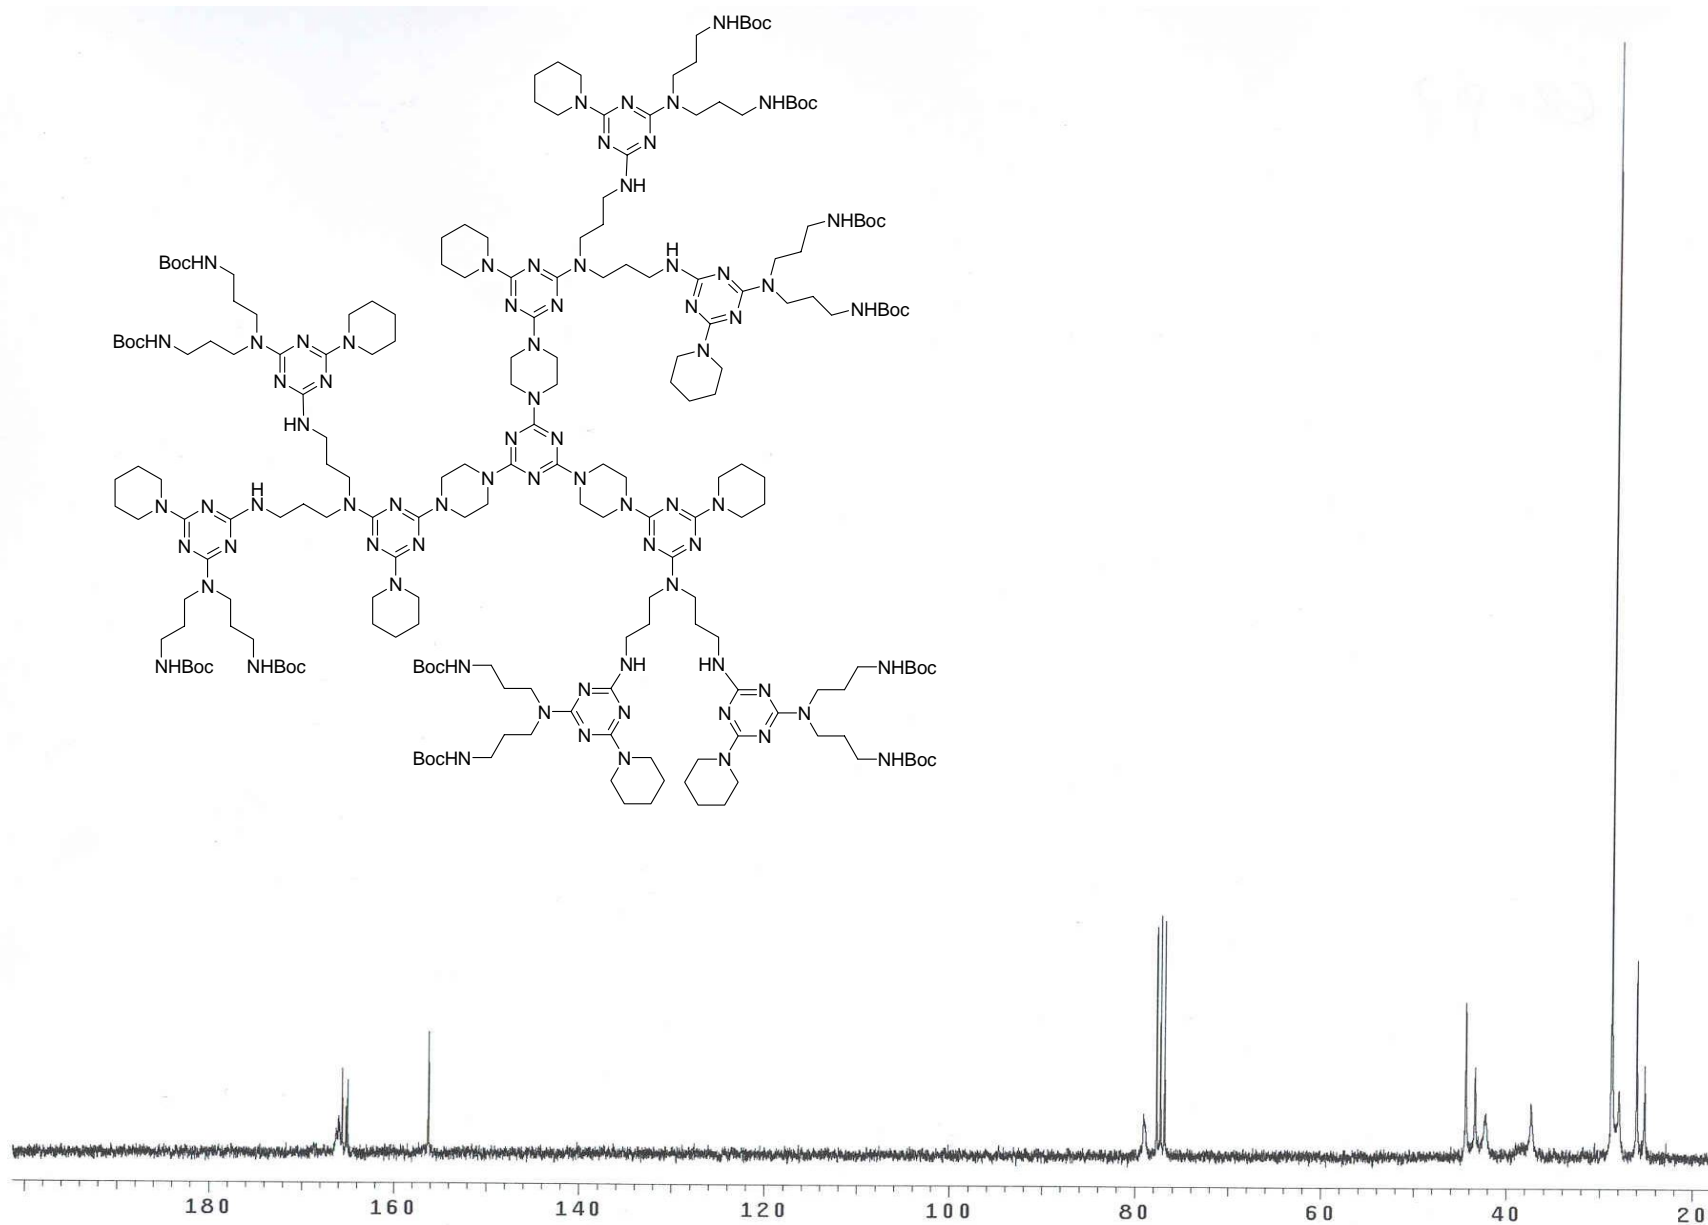

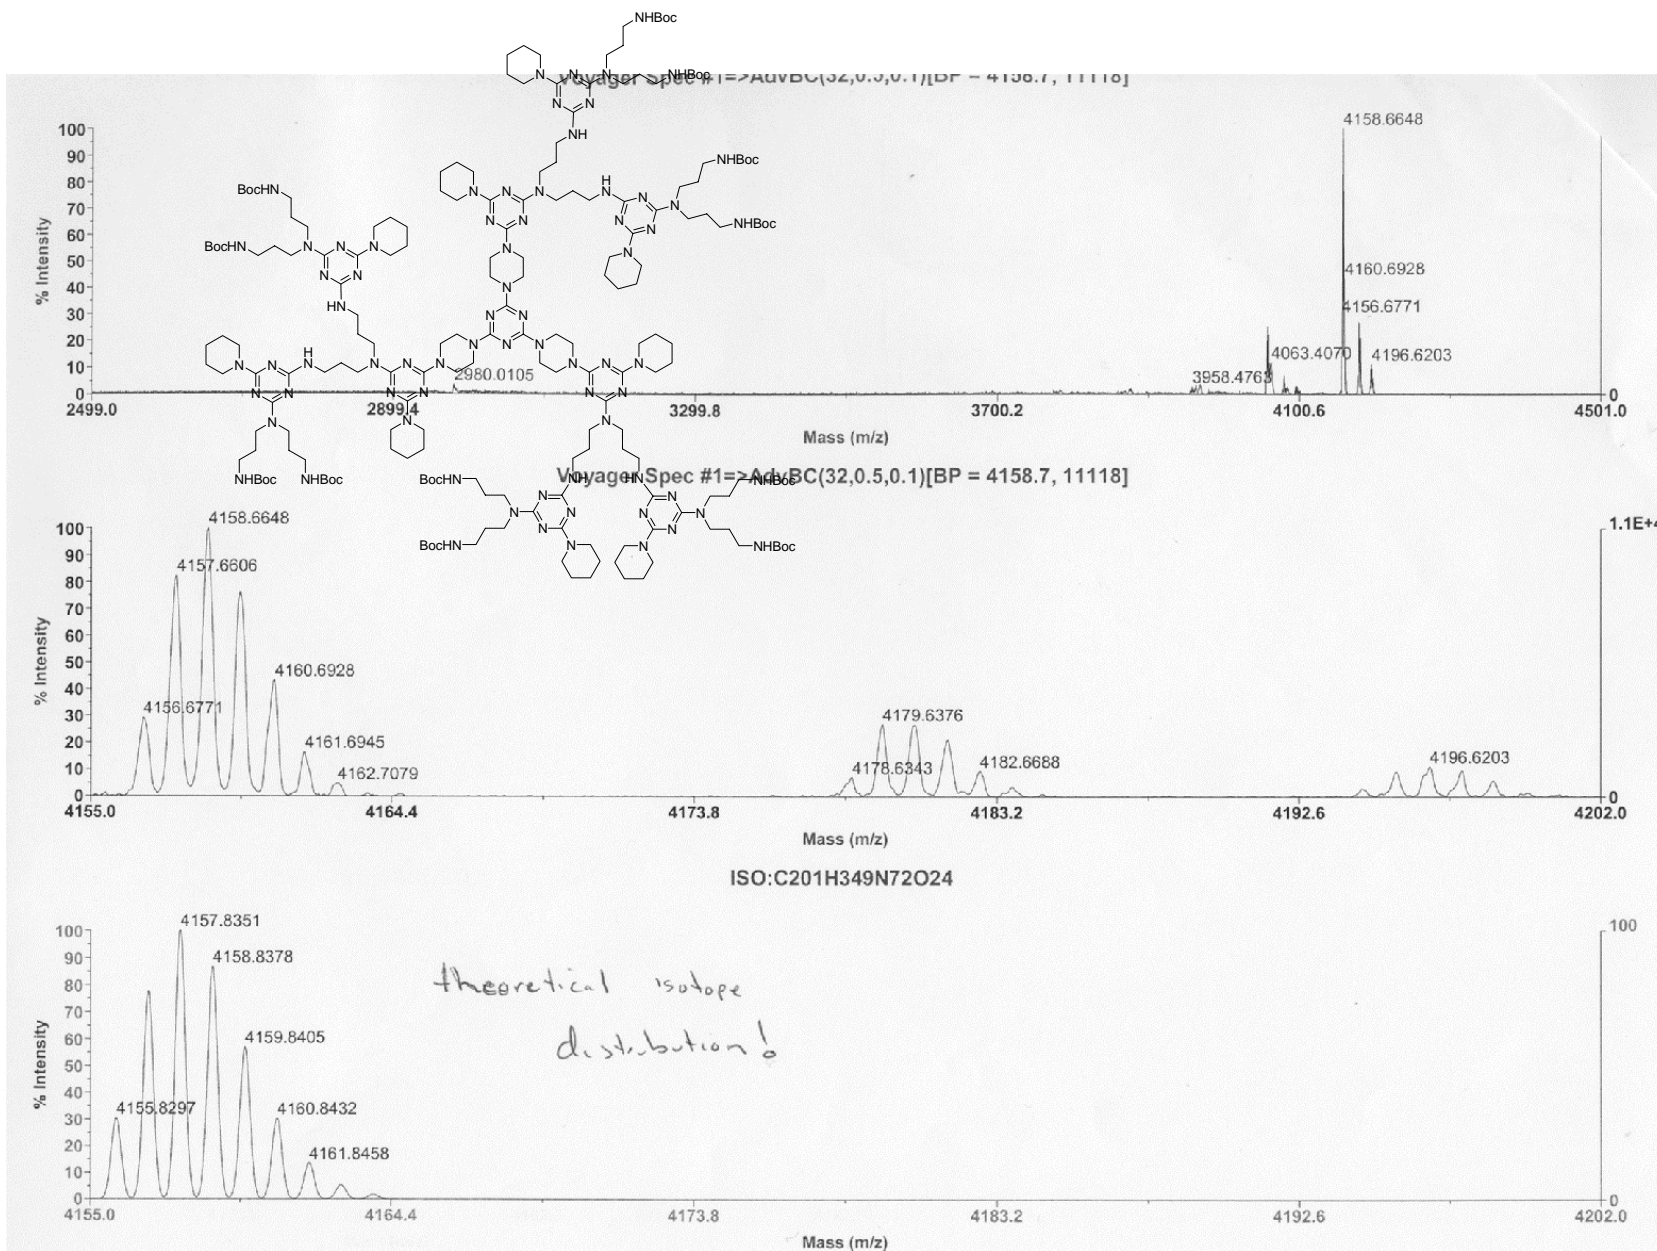

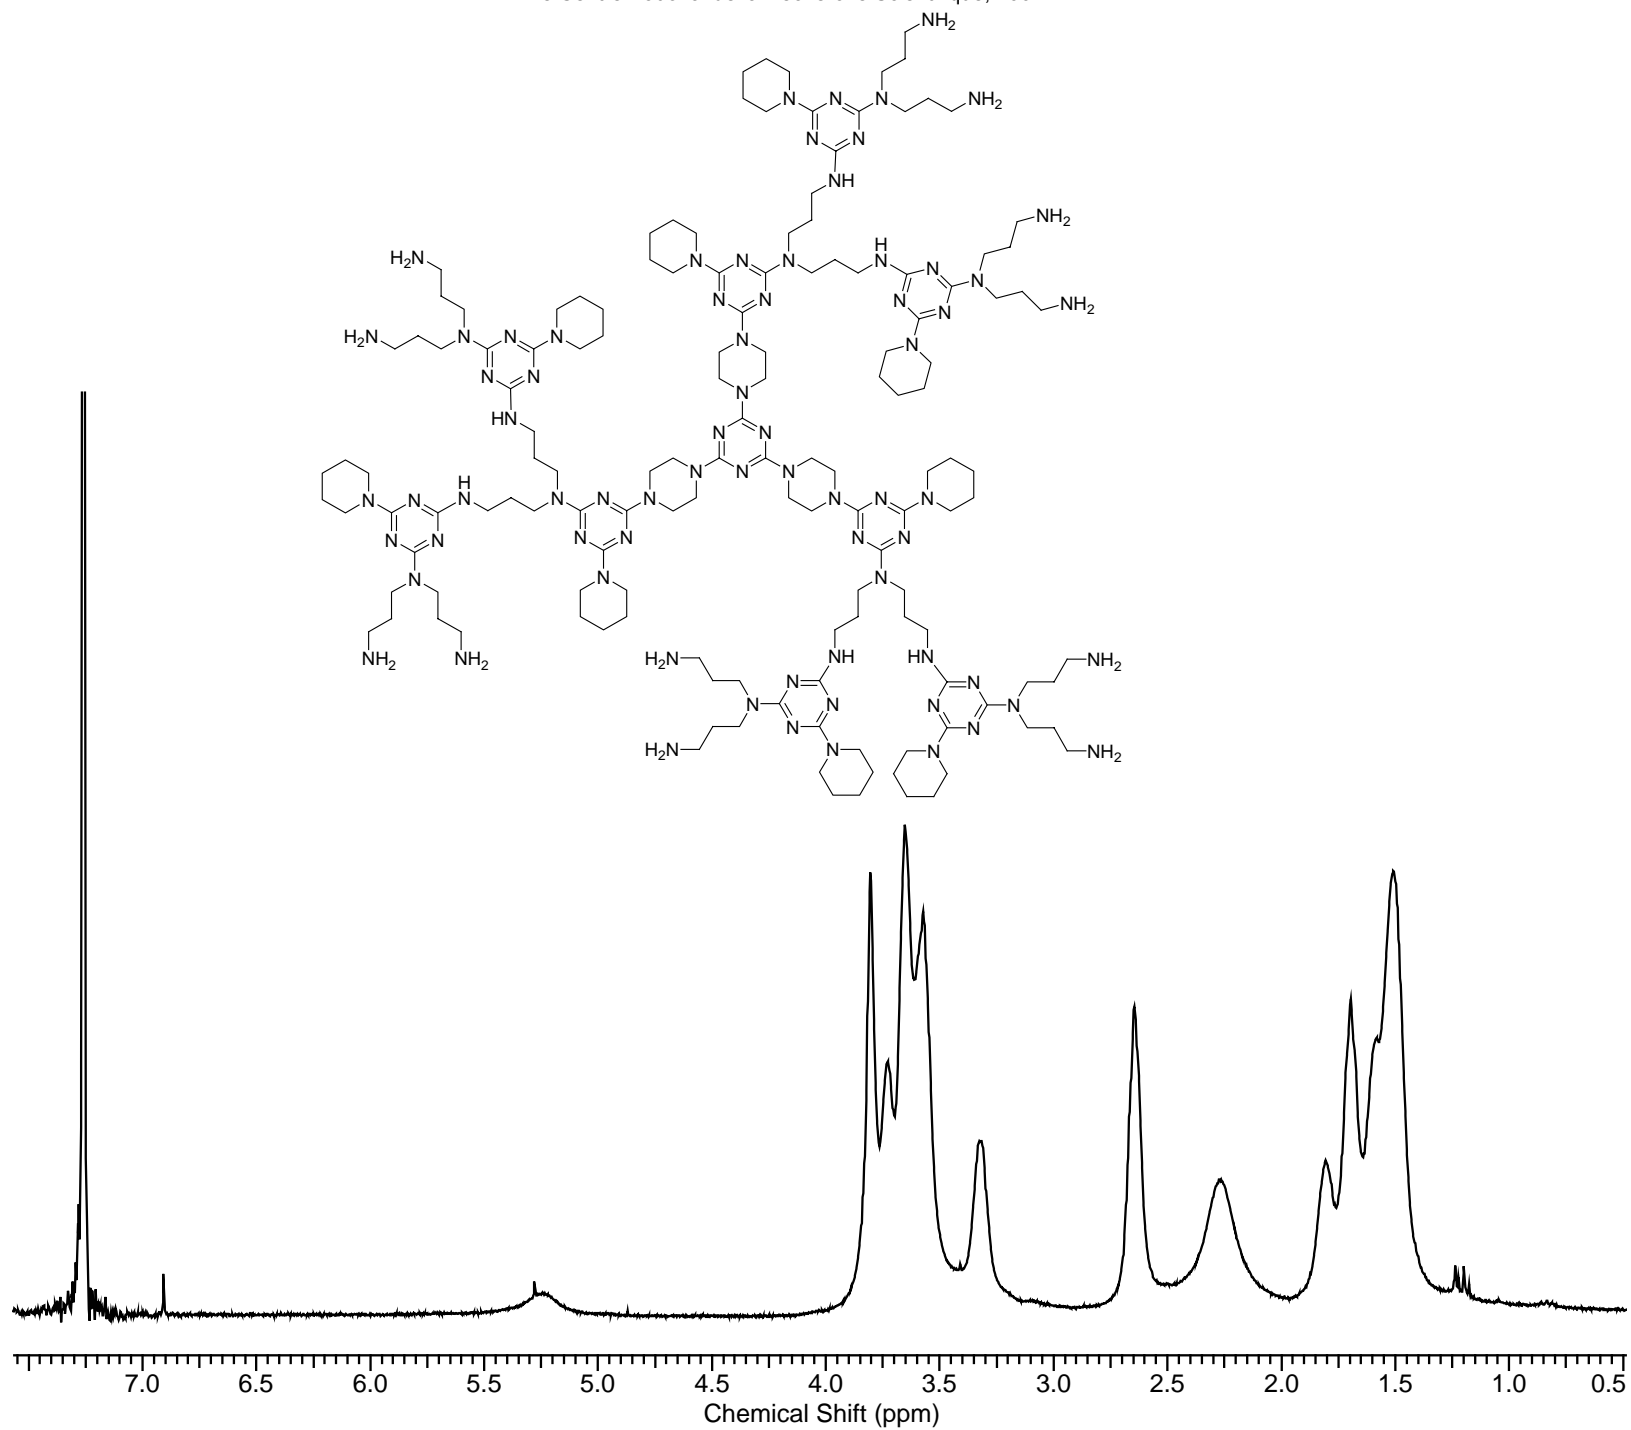

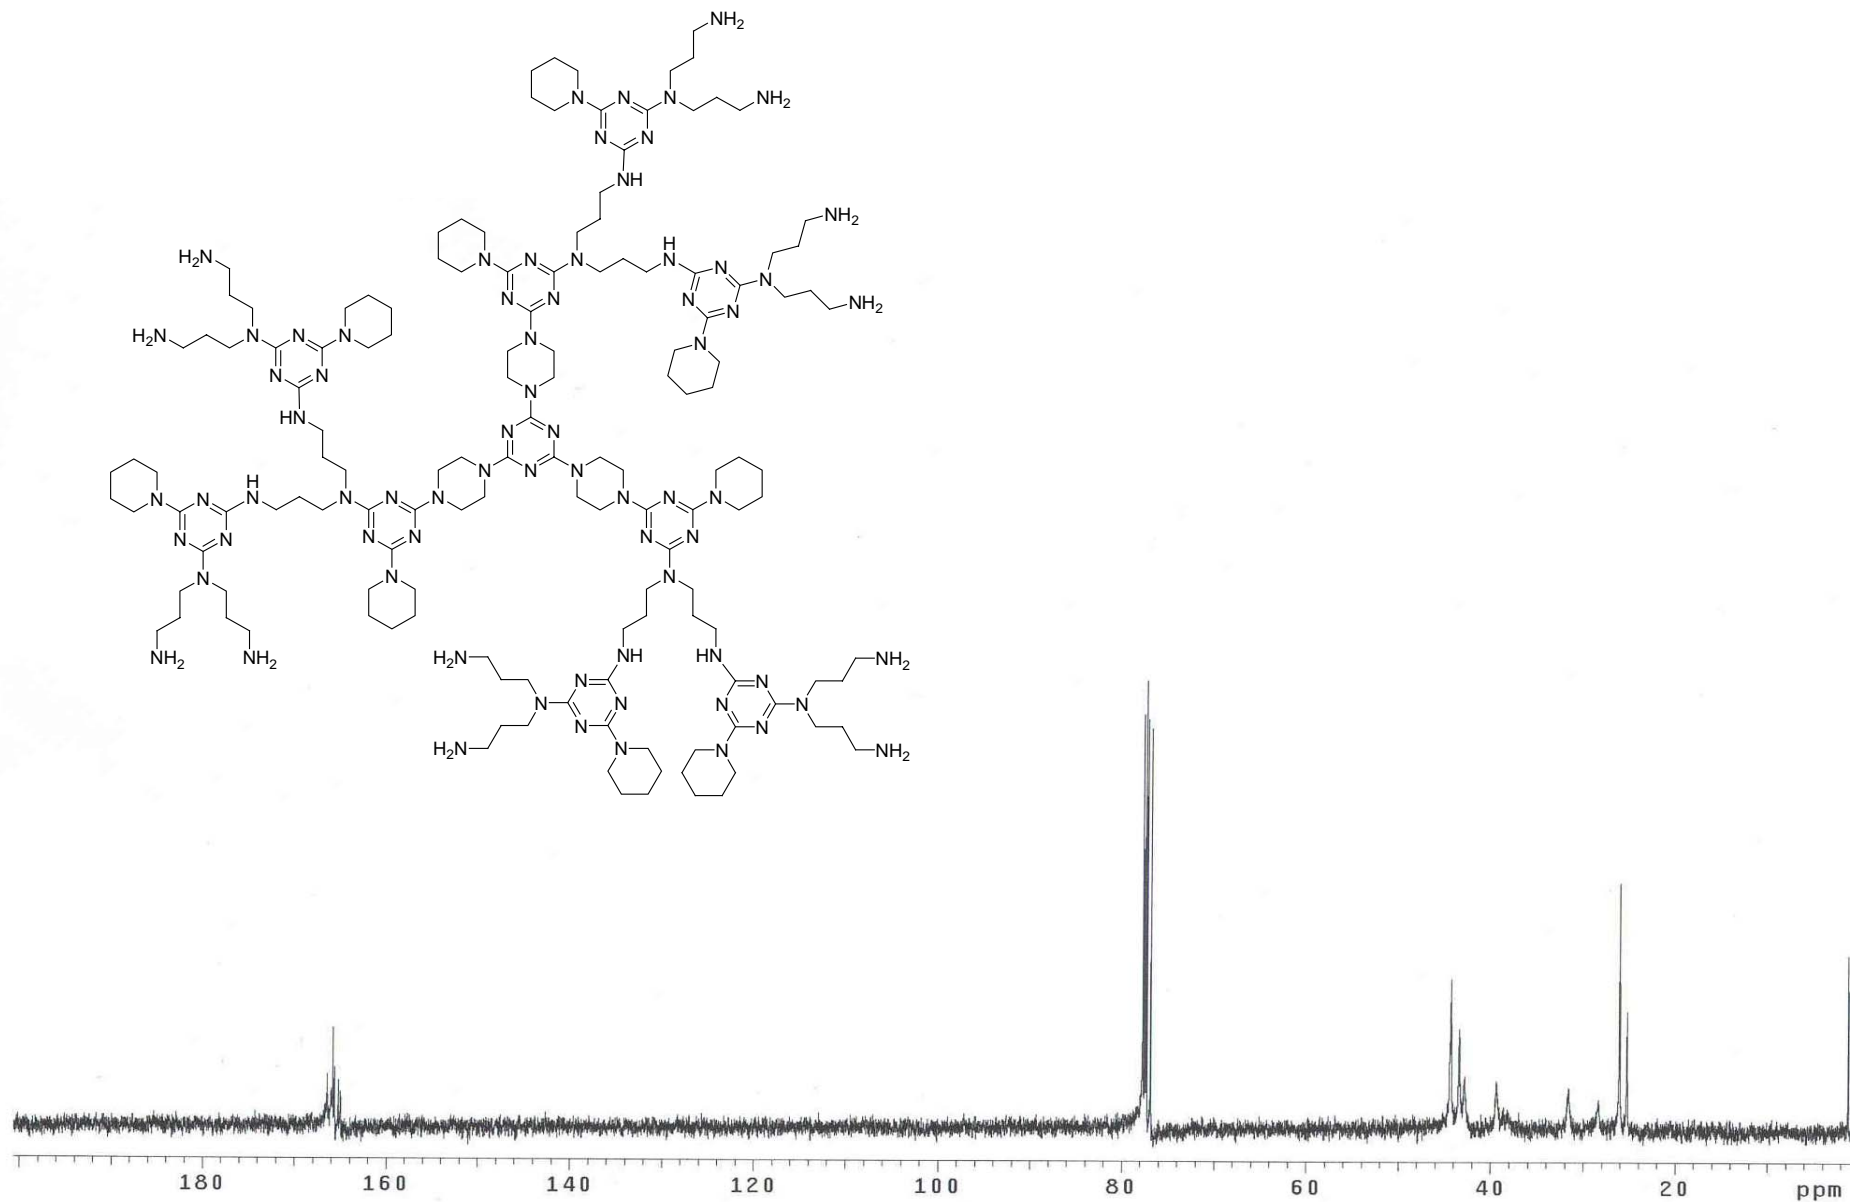



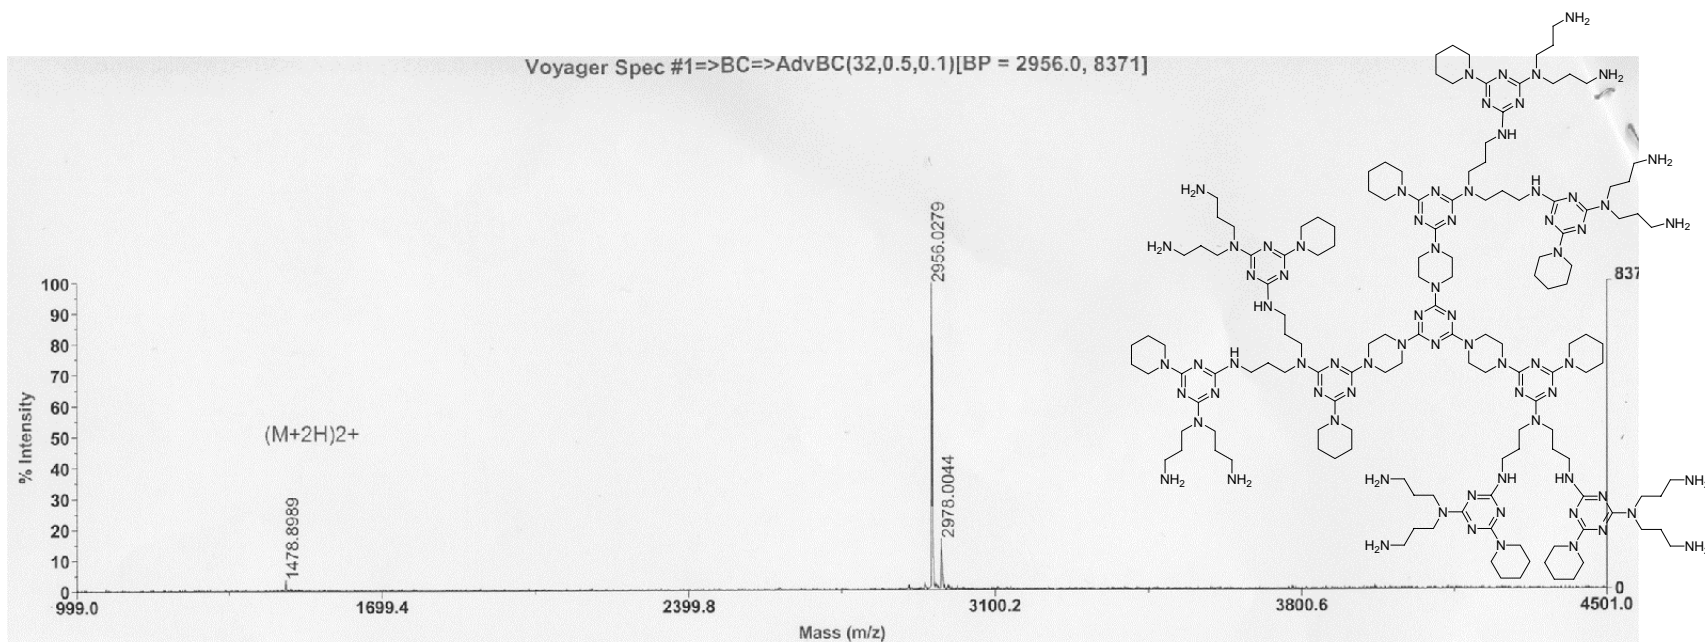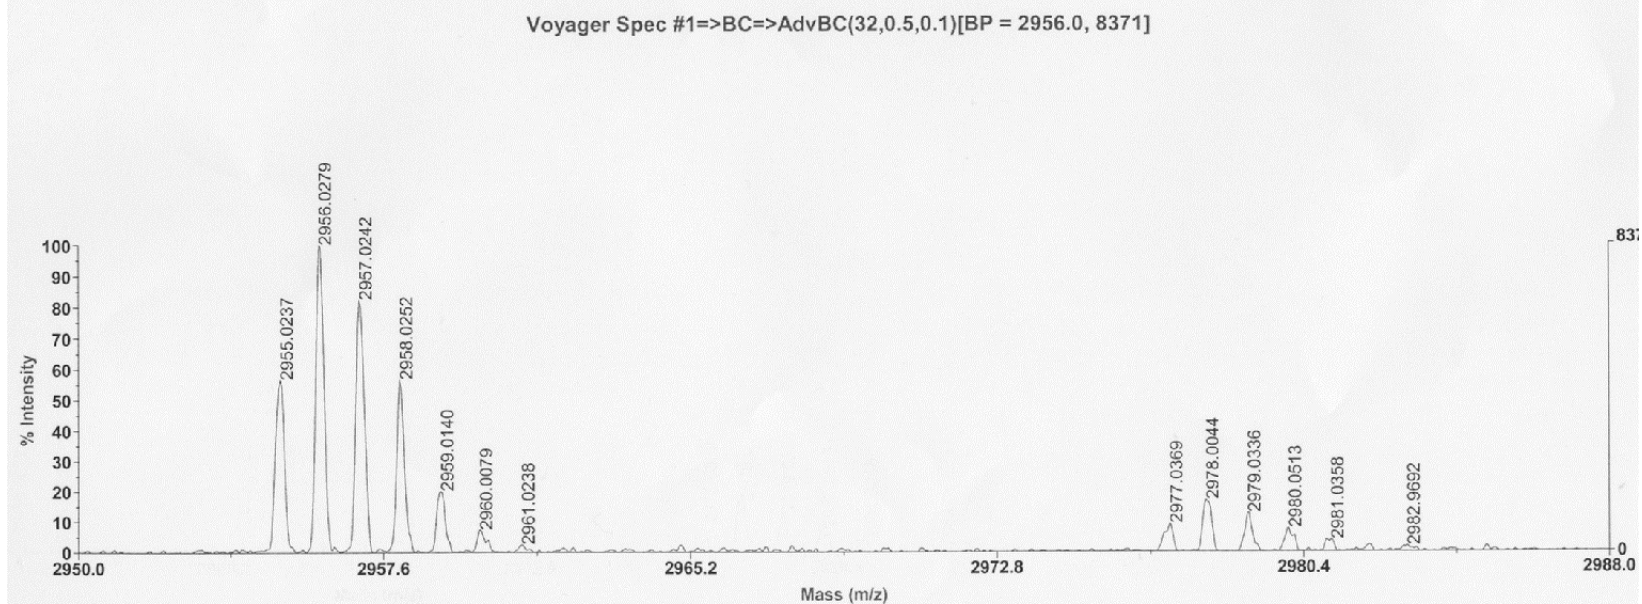

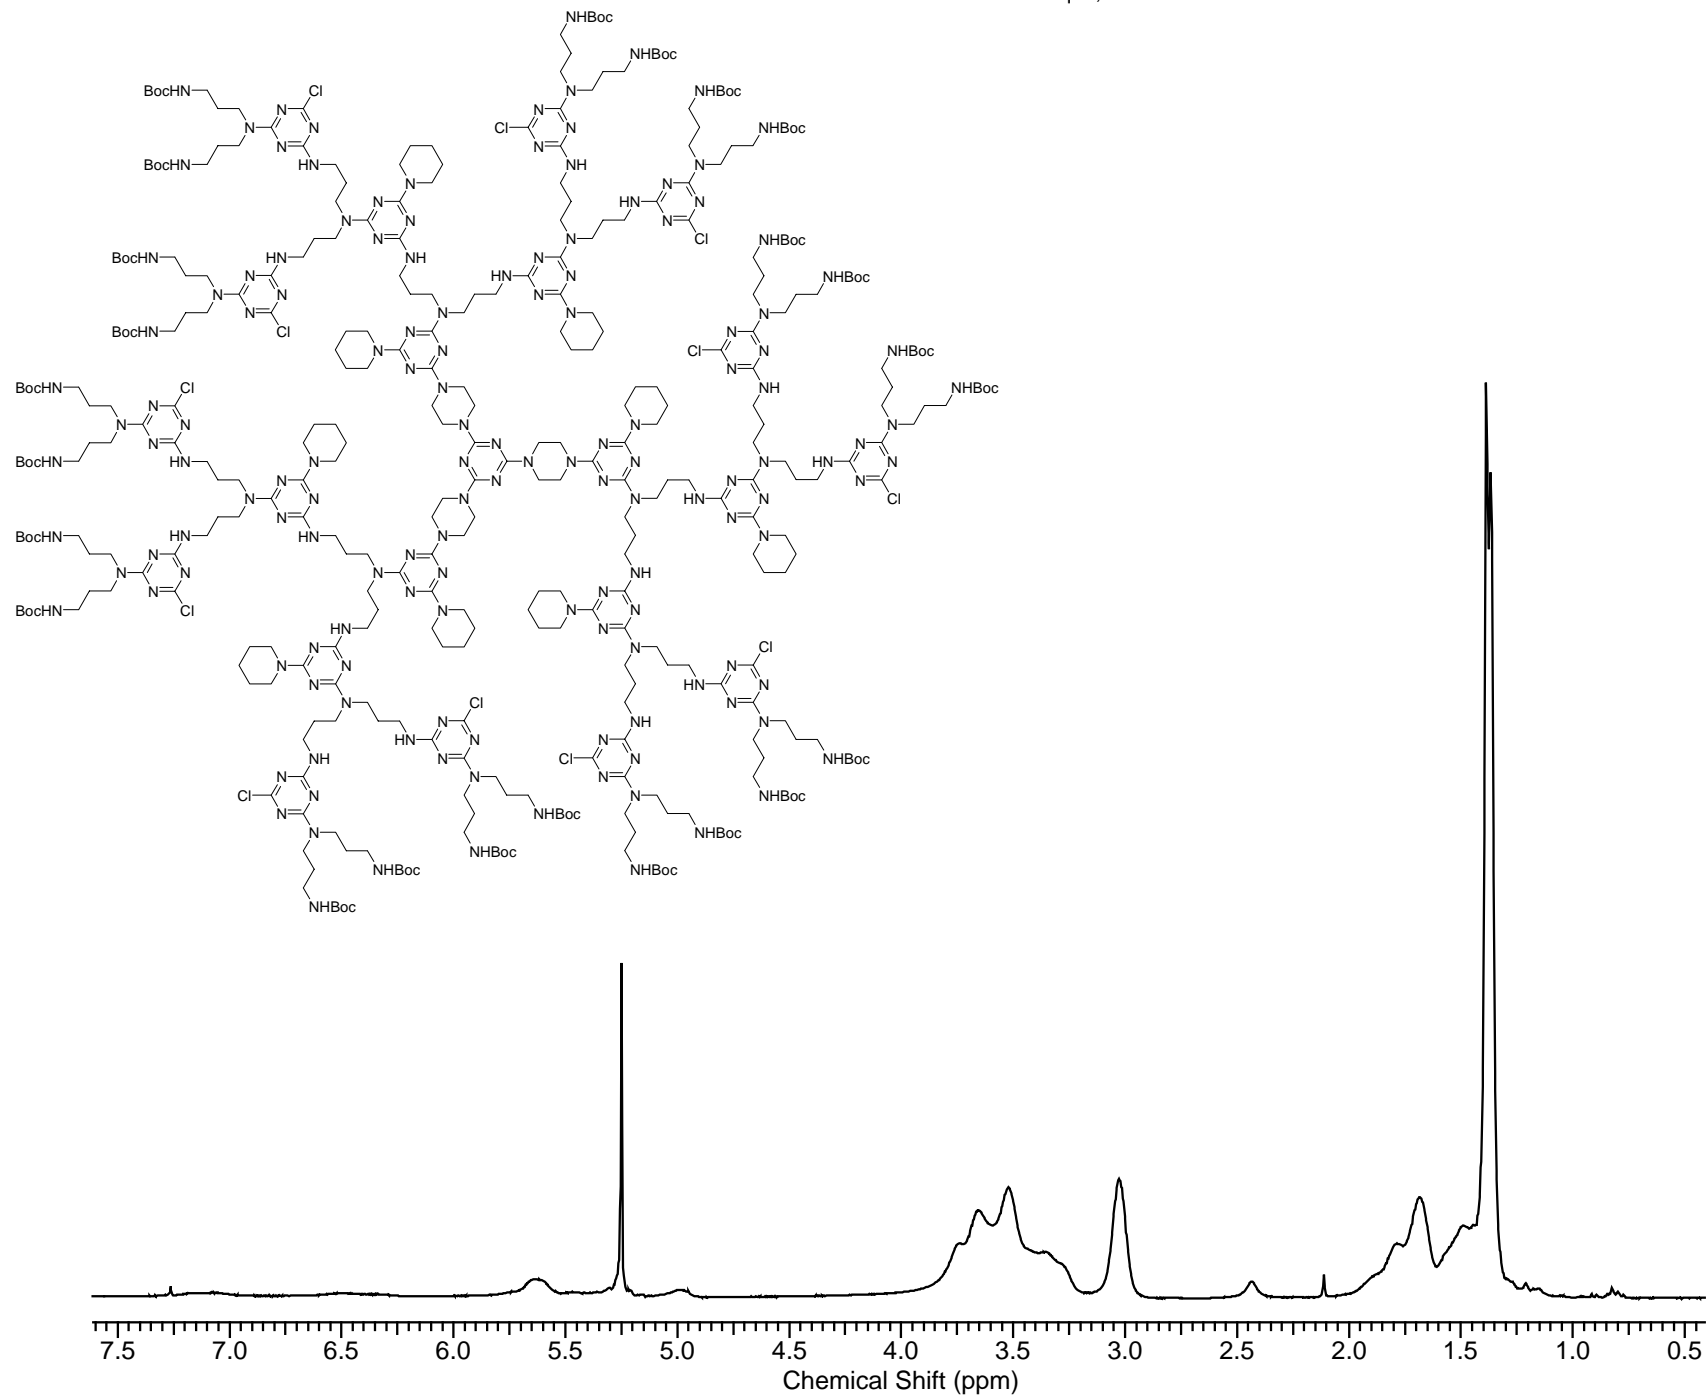

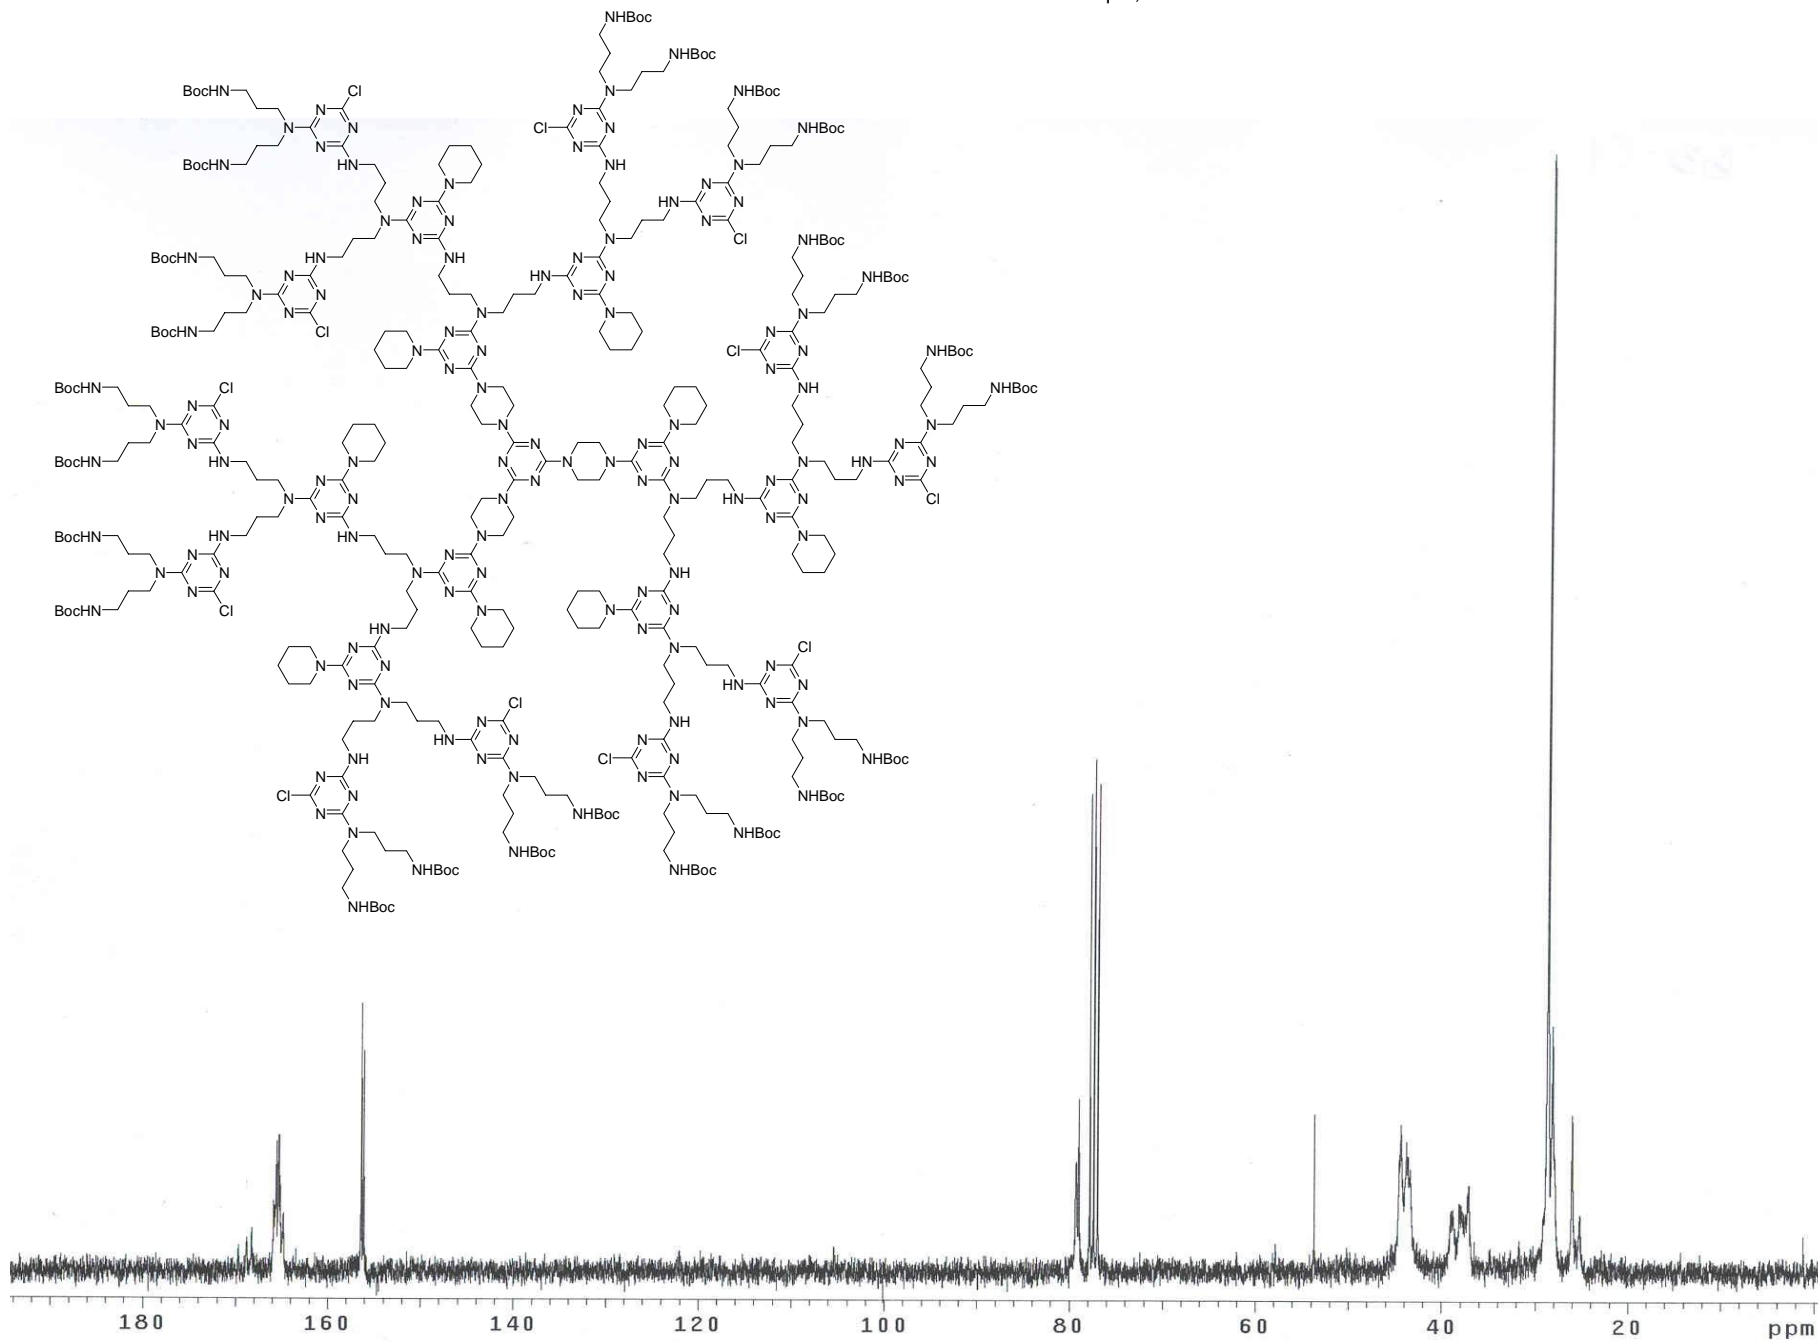

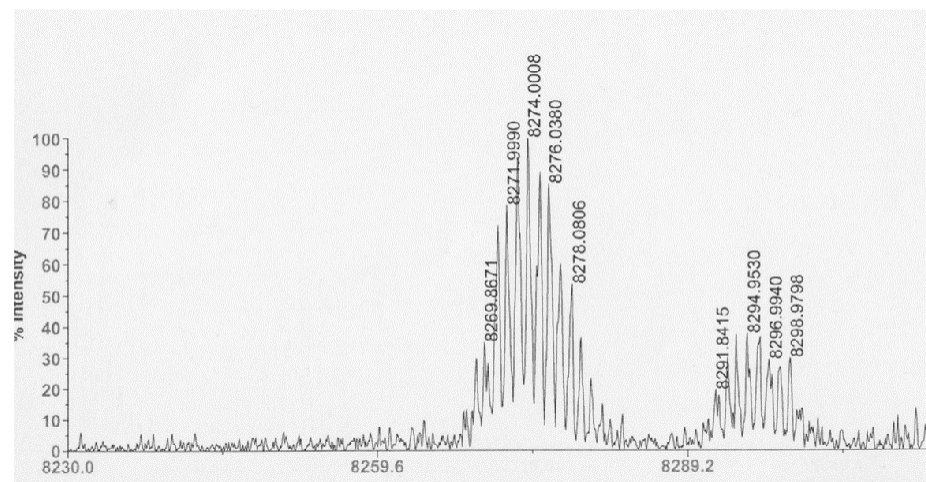

← Linear mode

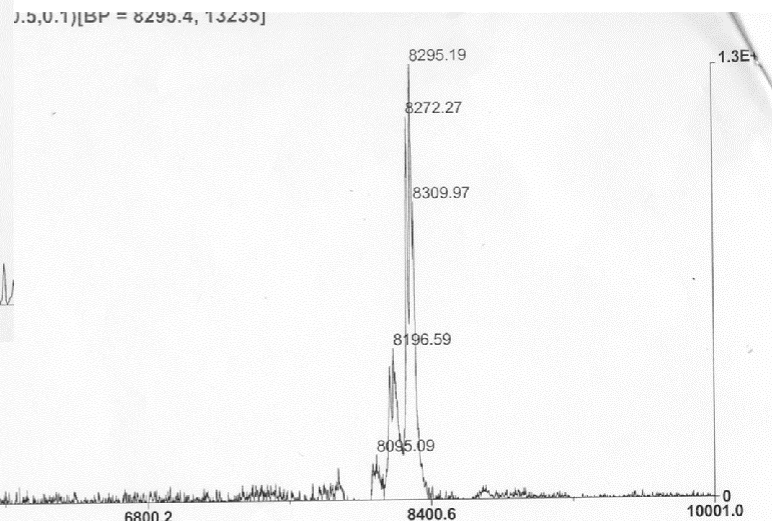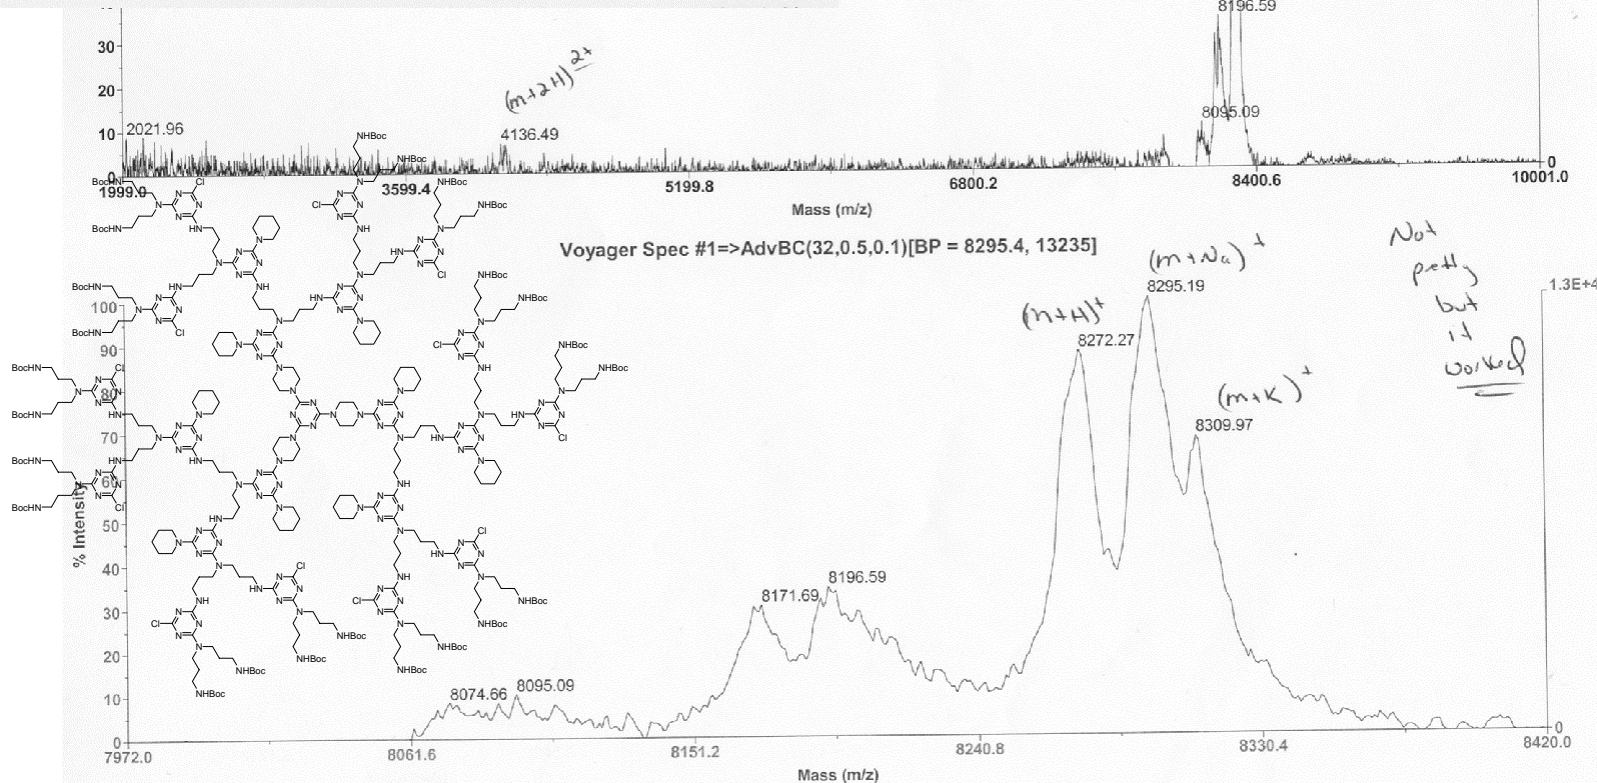

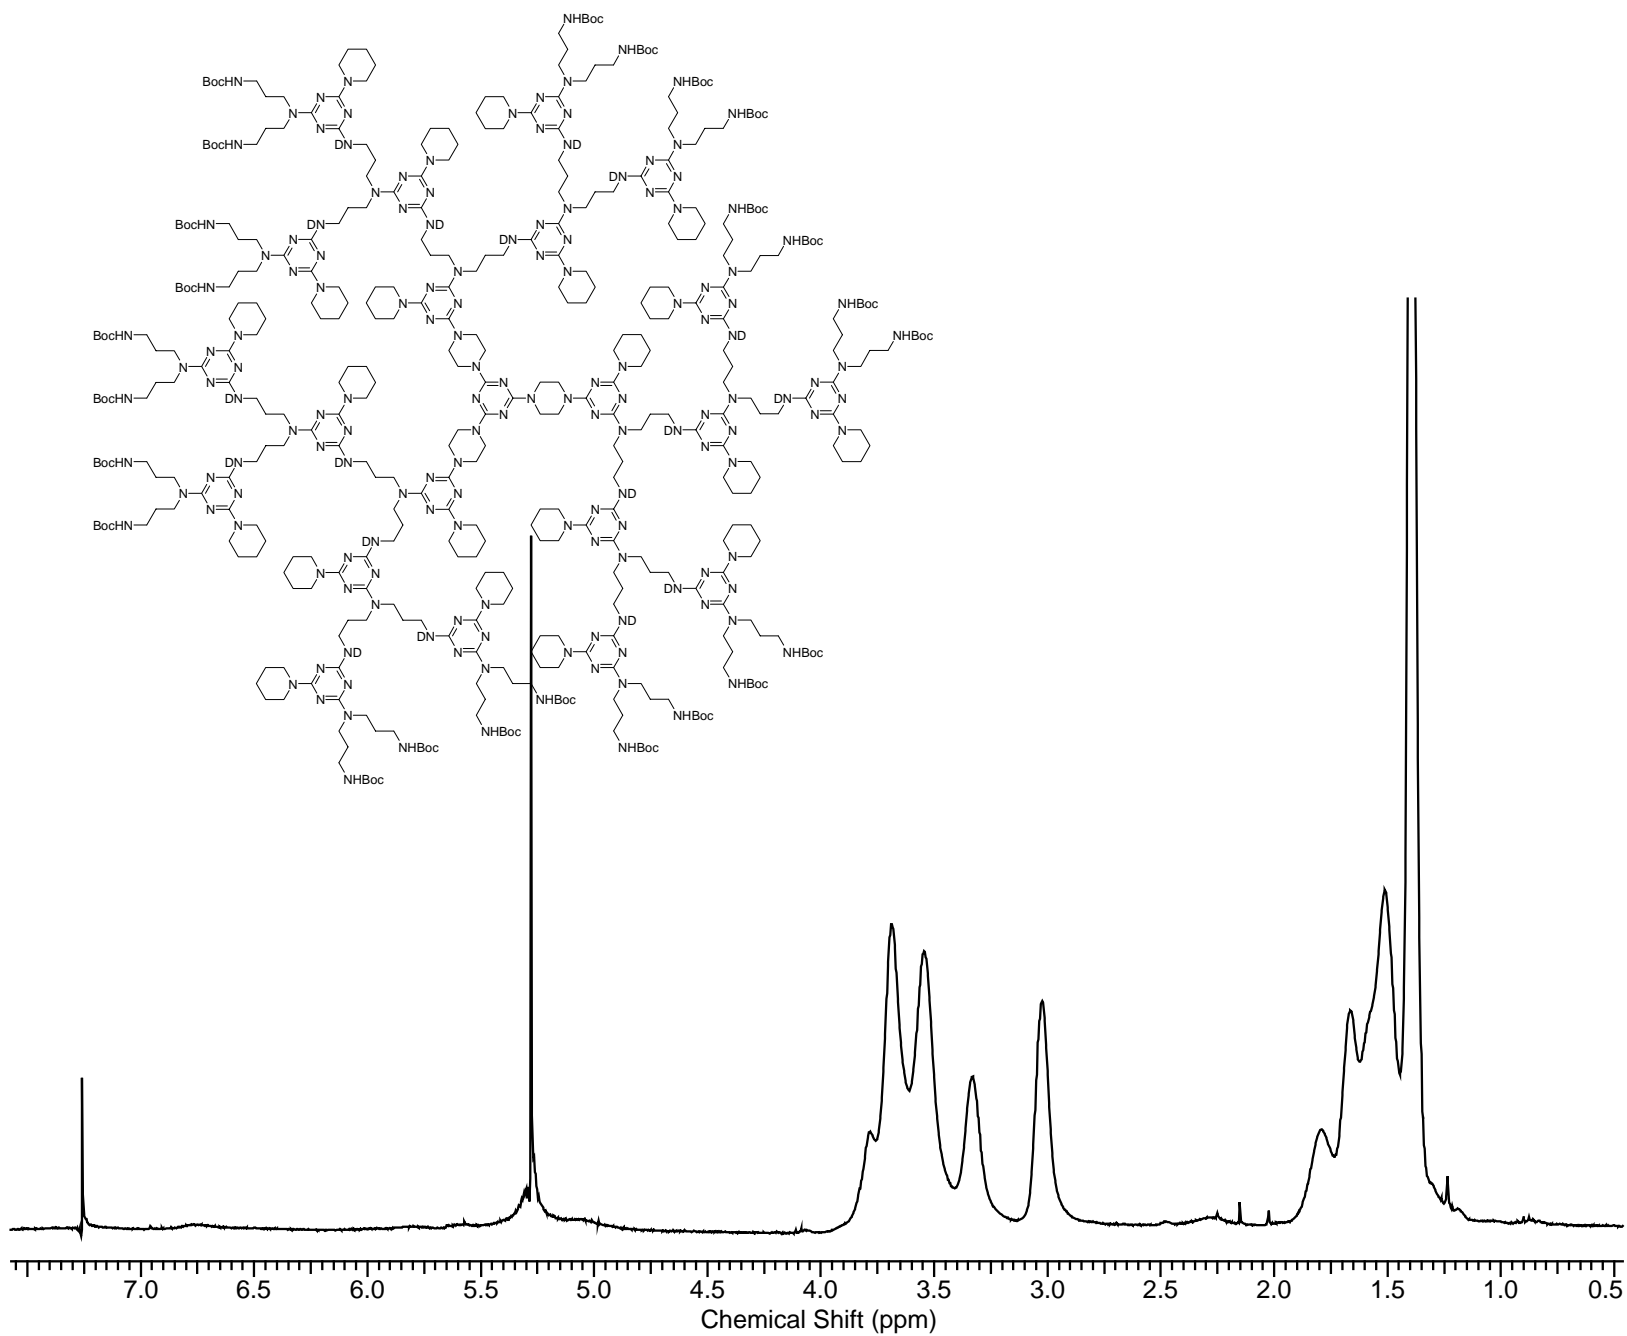

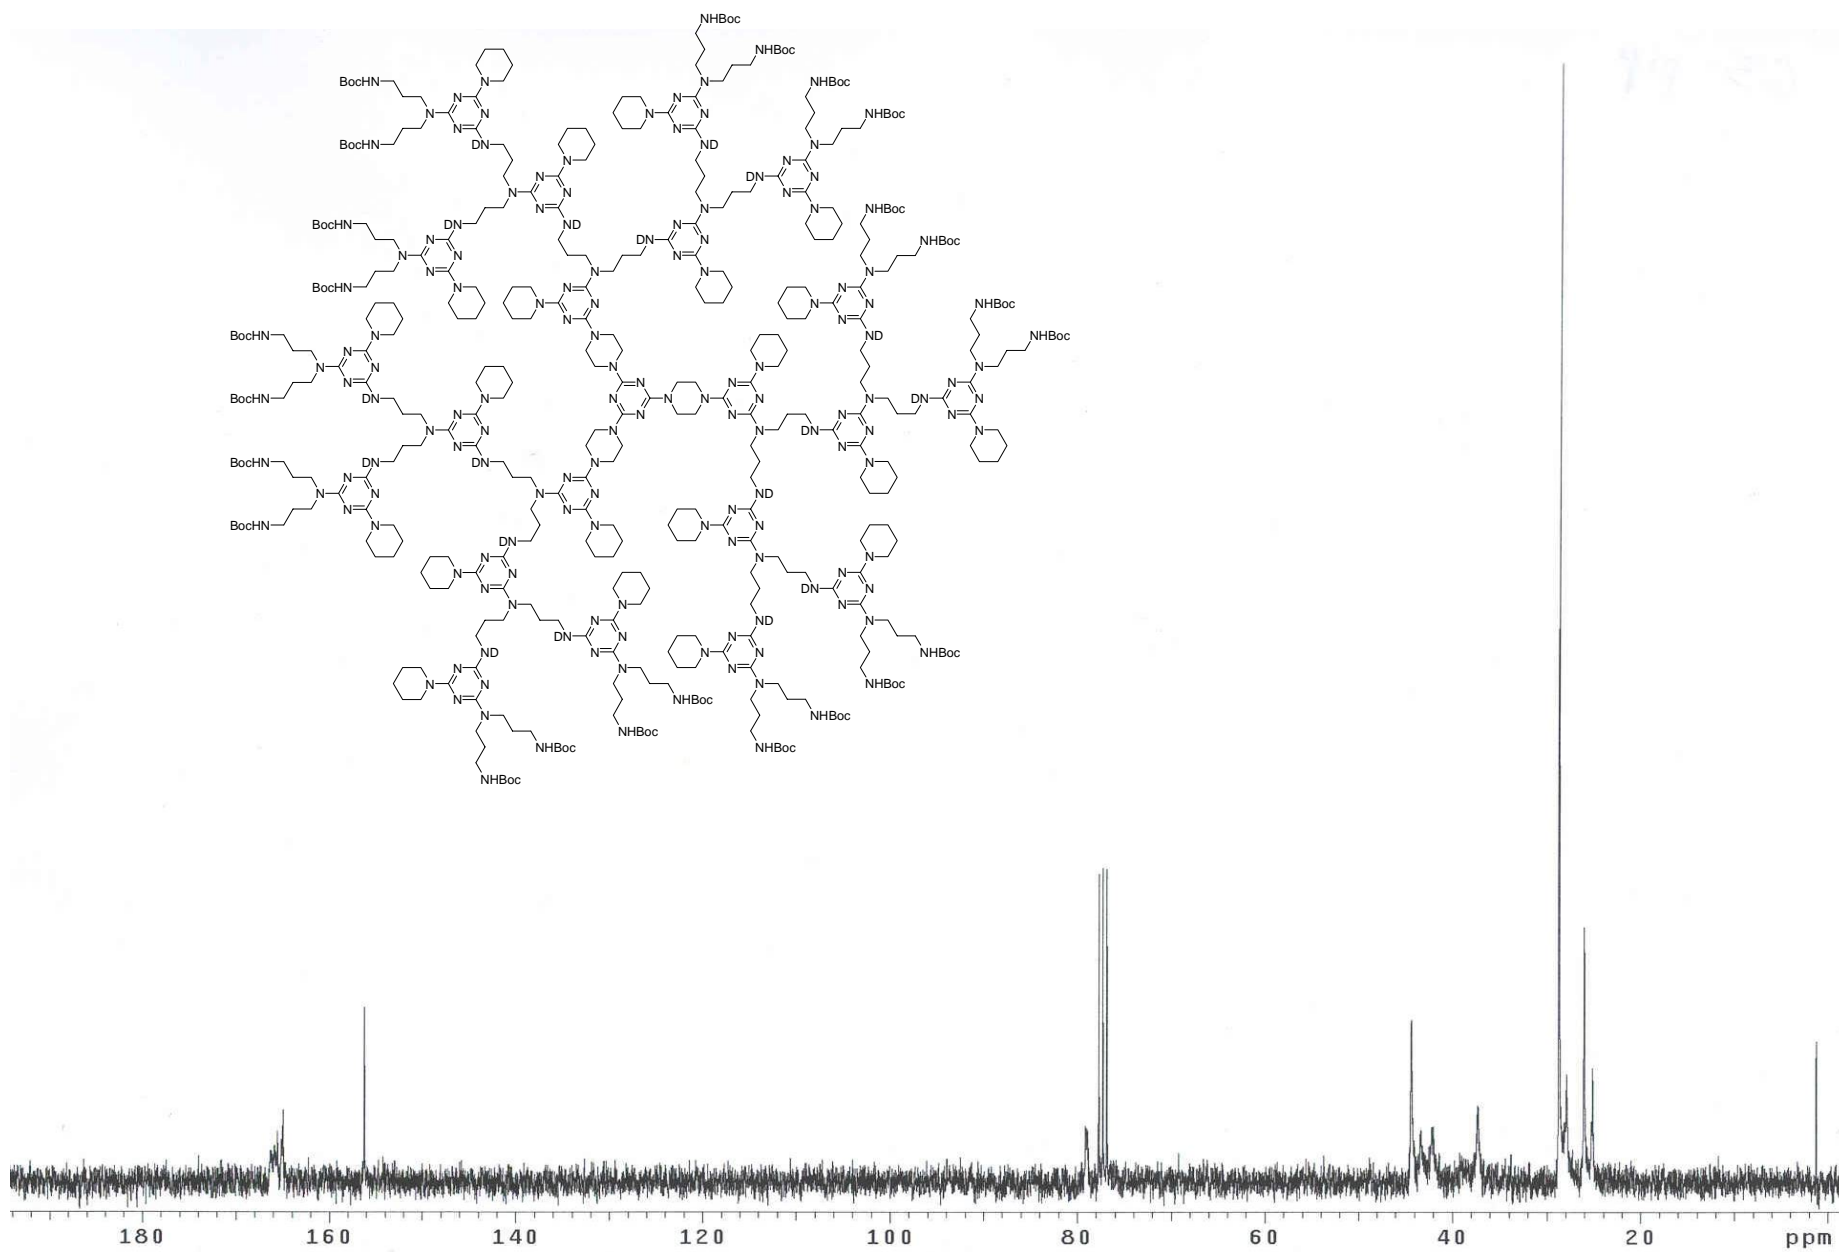

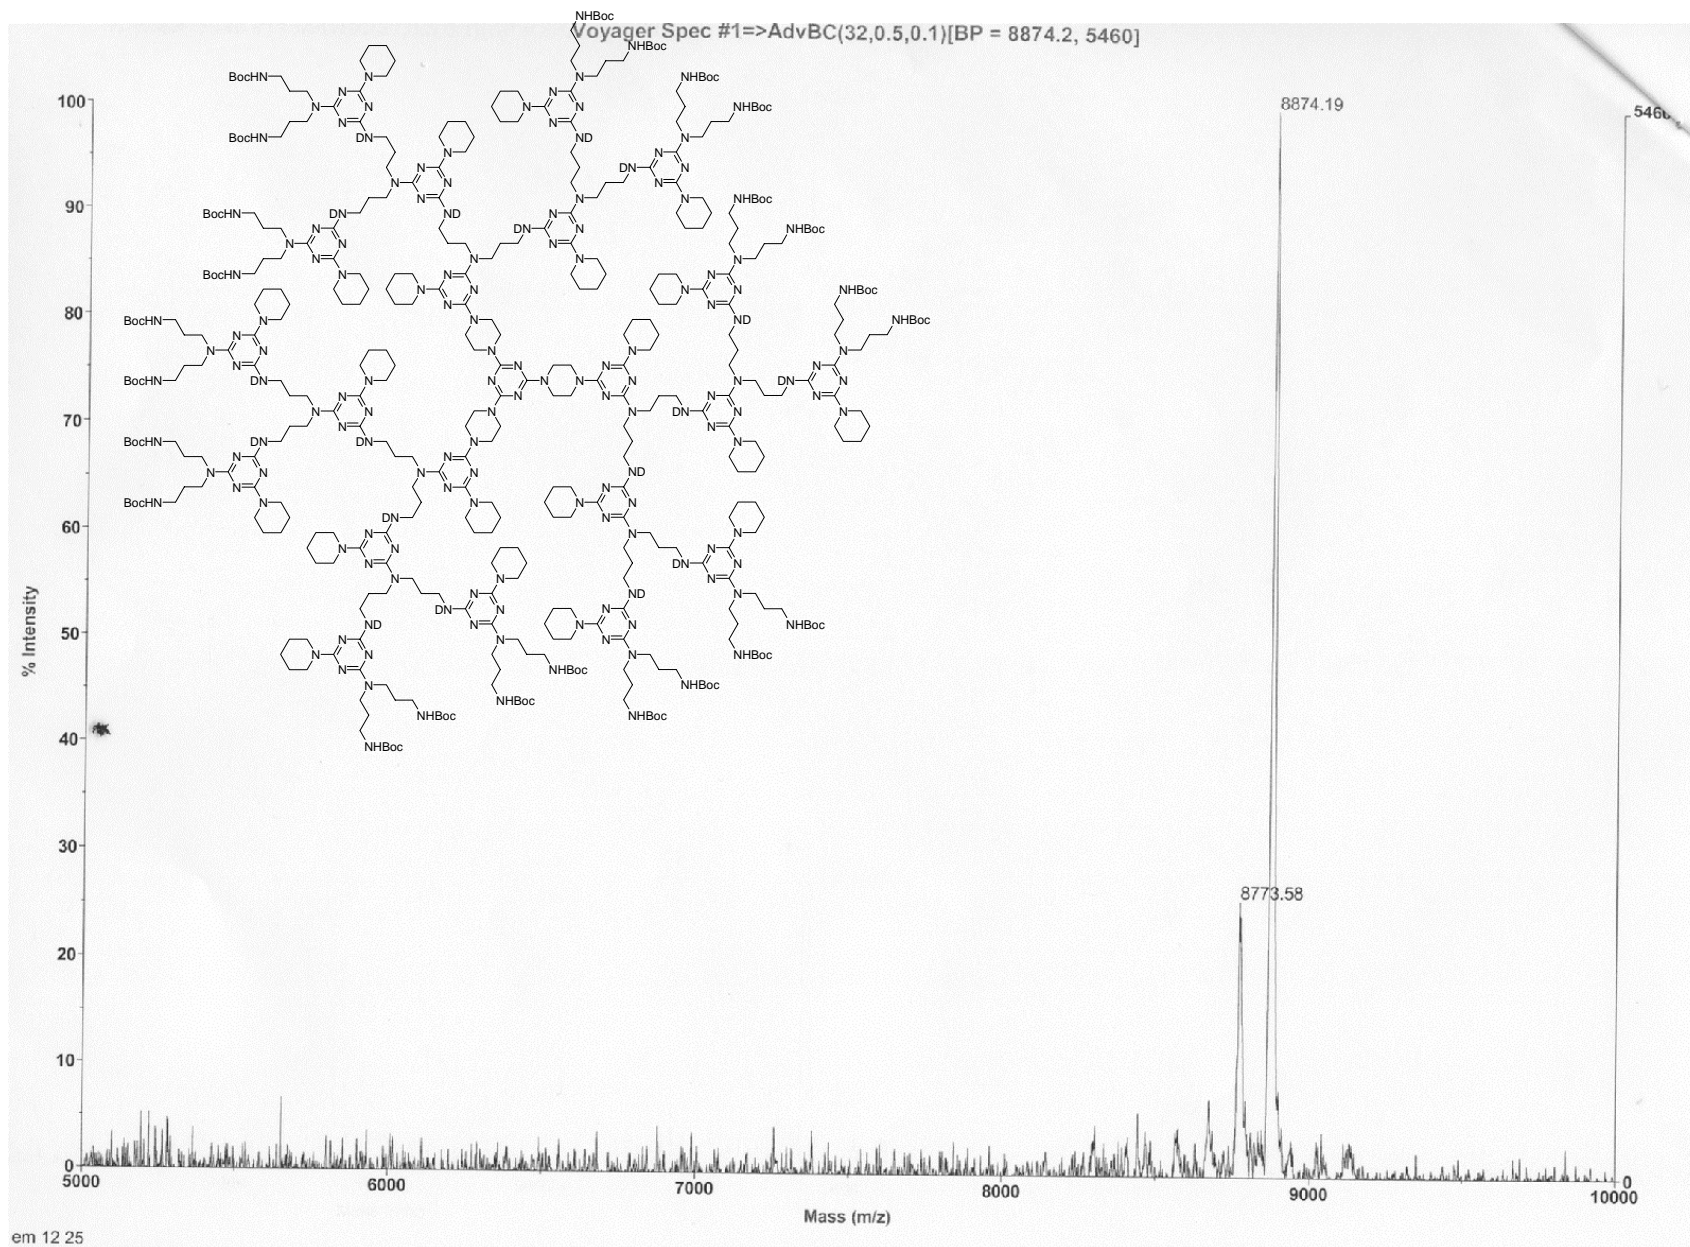

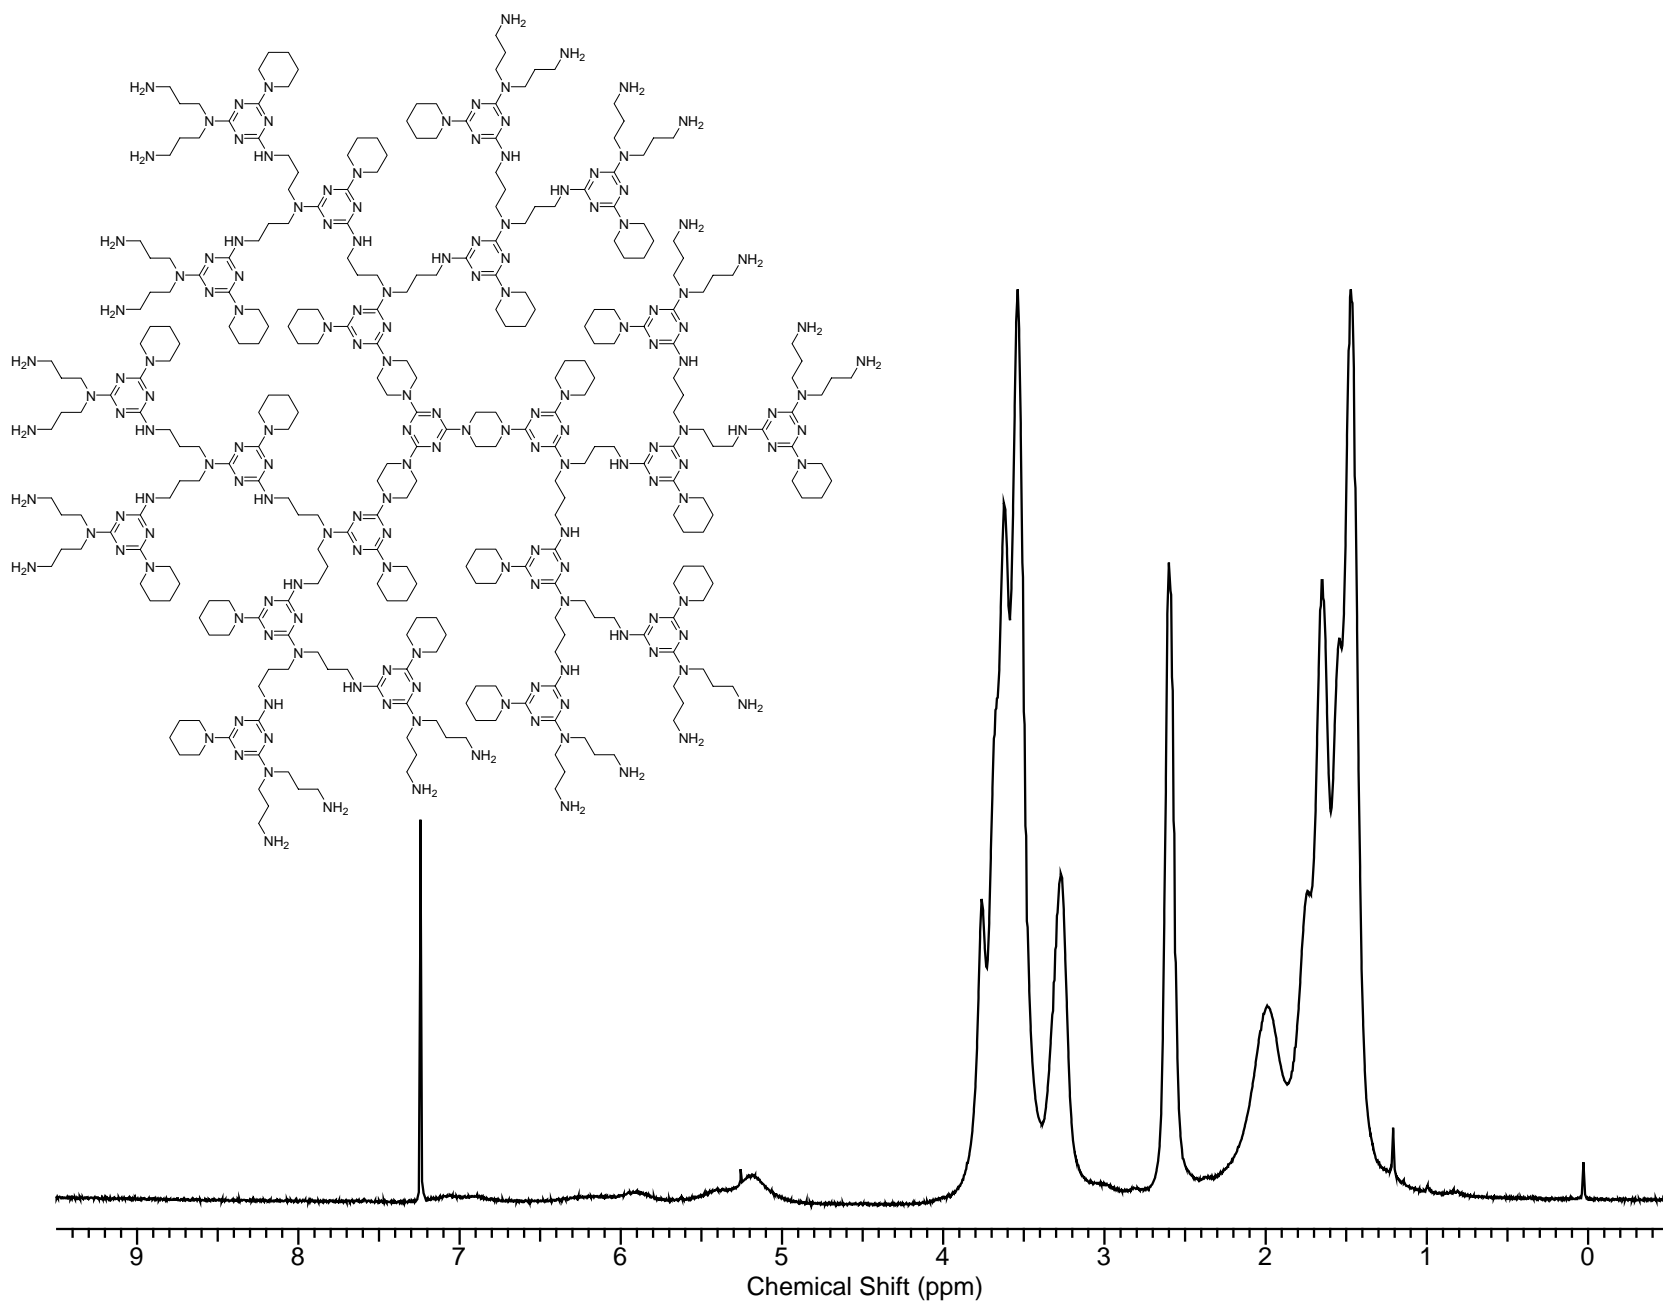



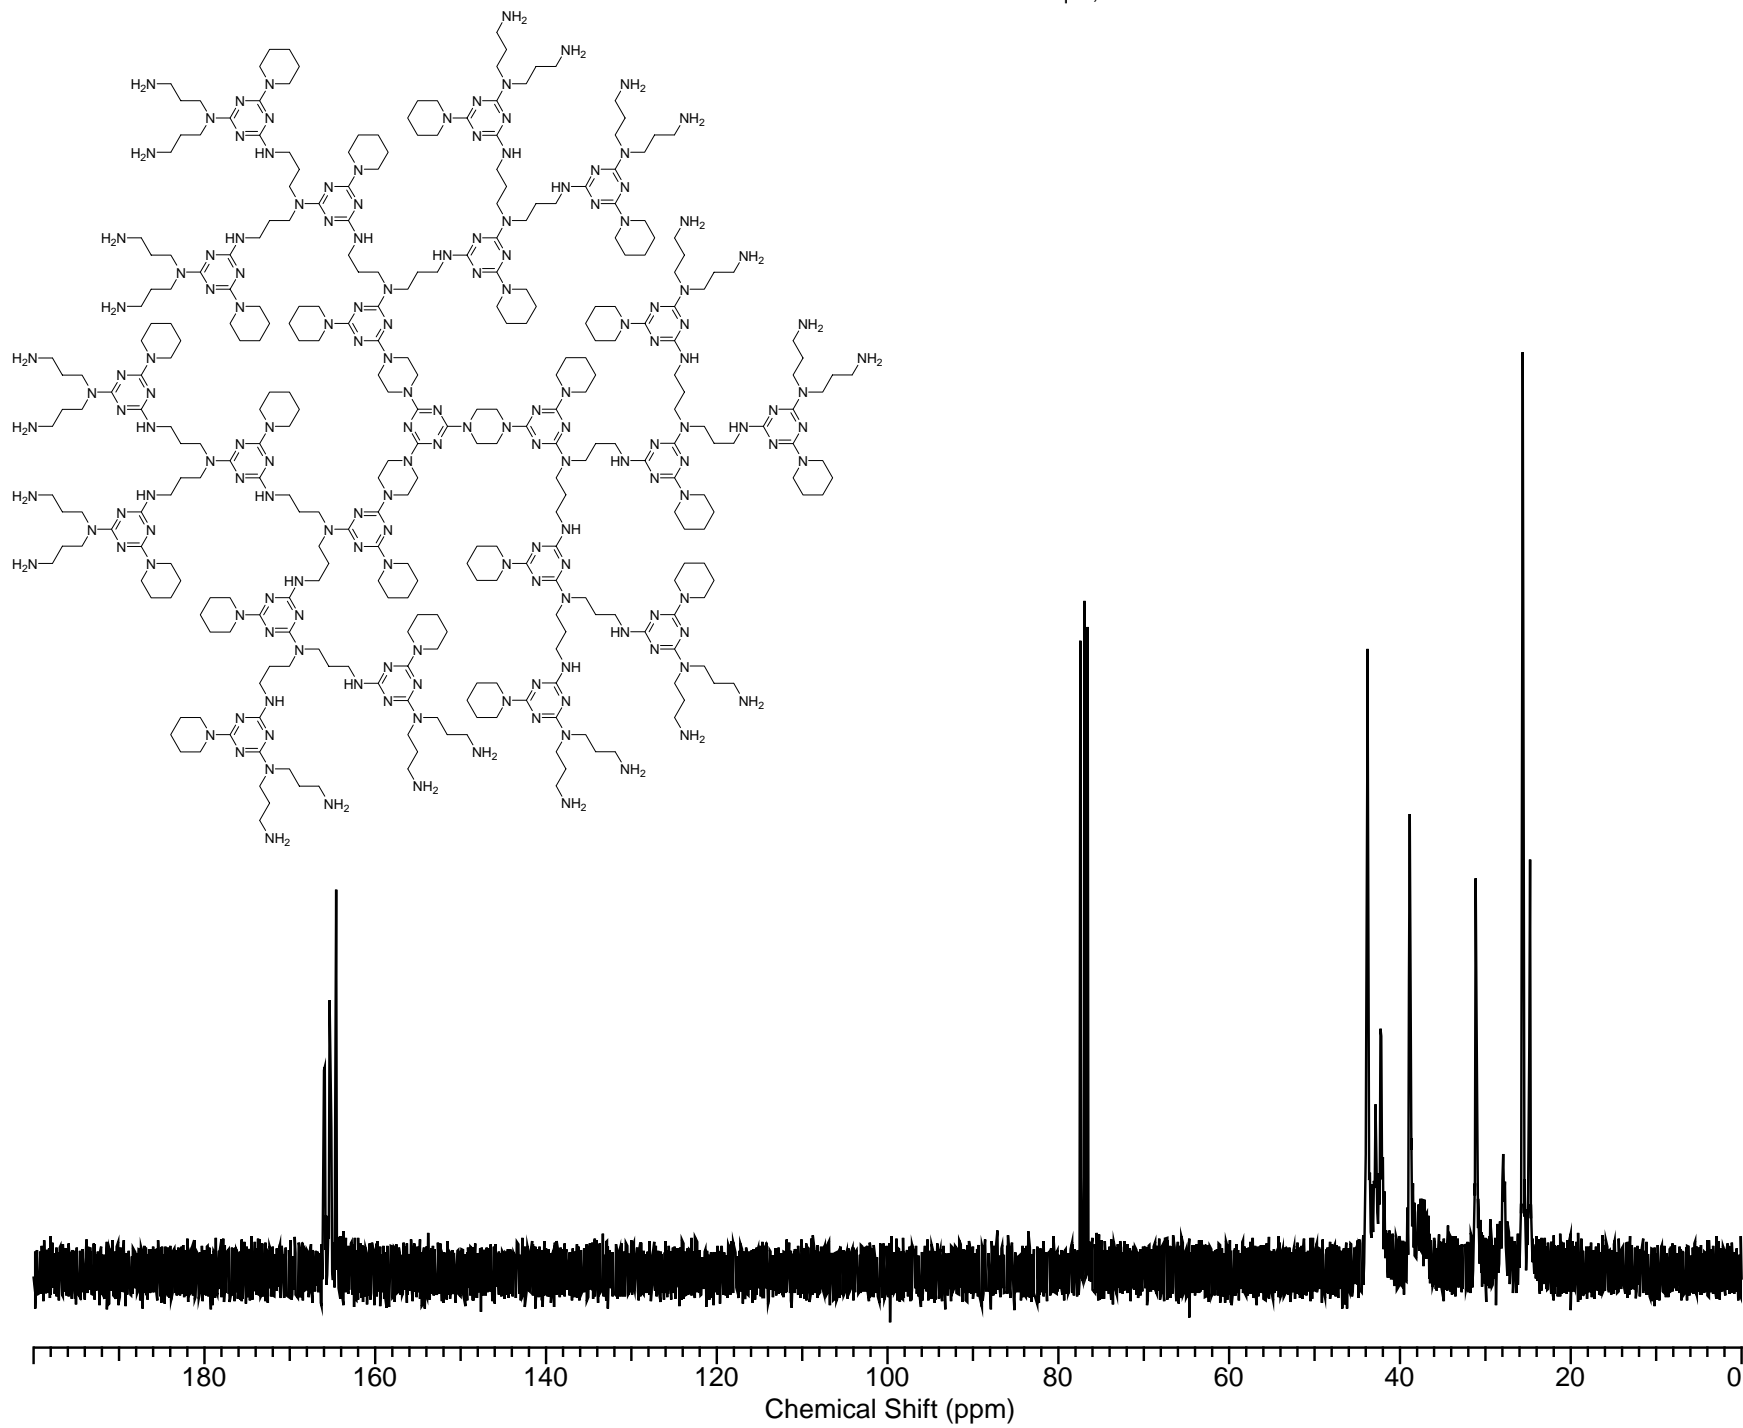

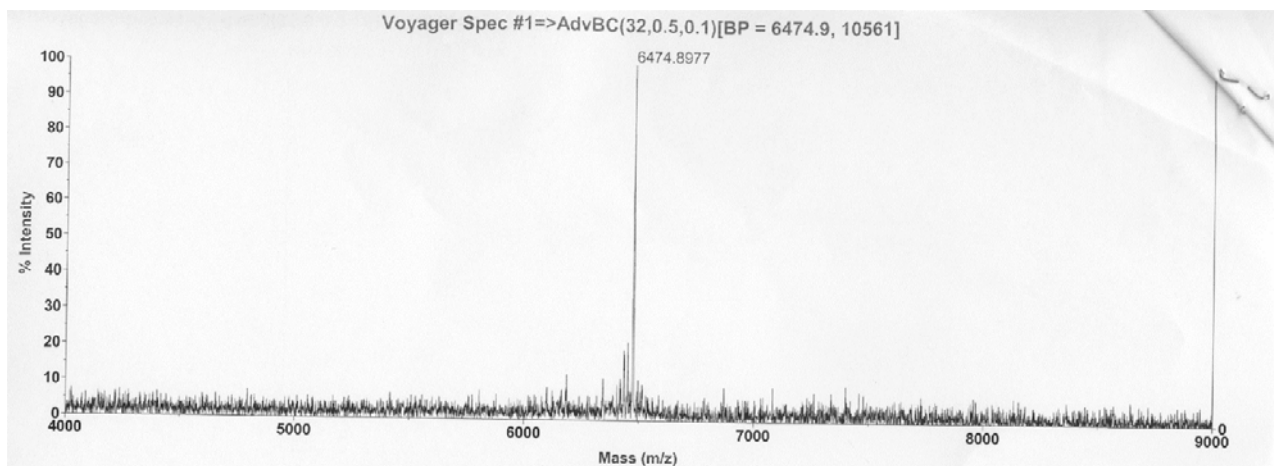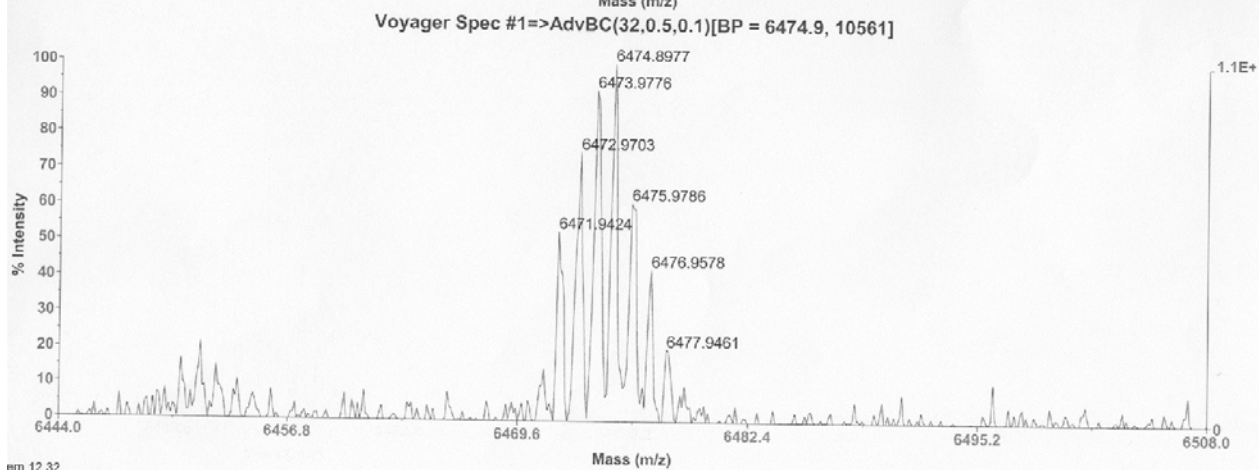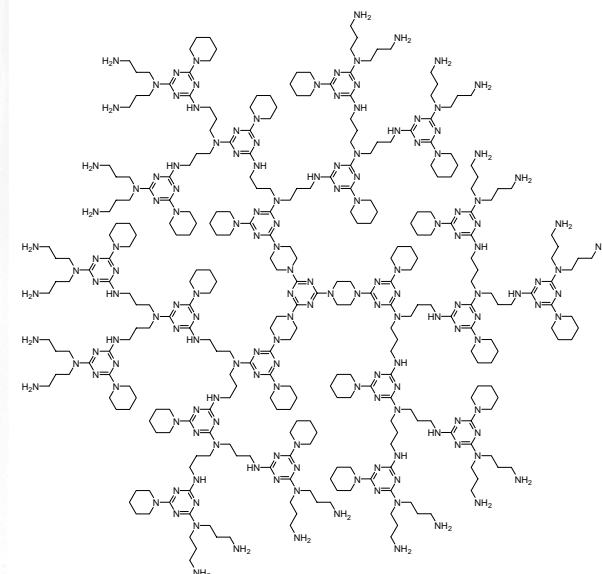

em 12.32

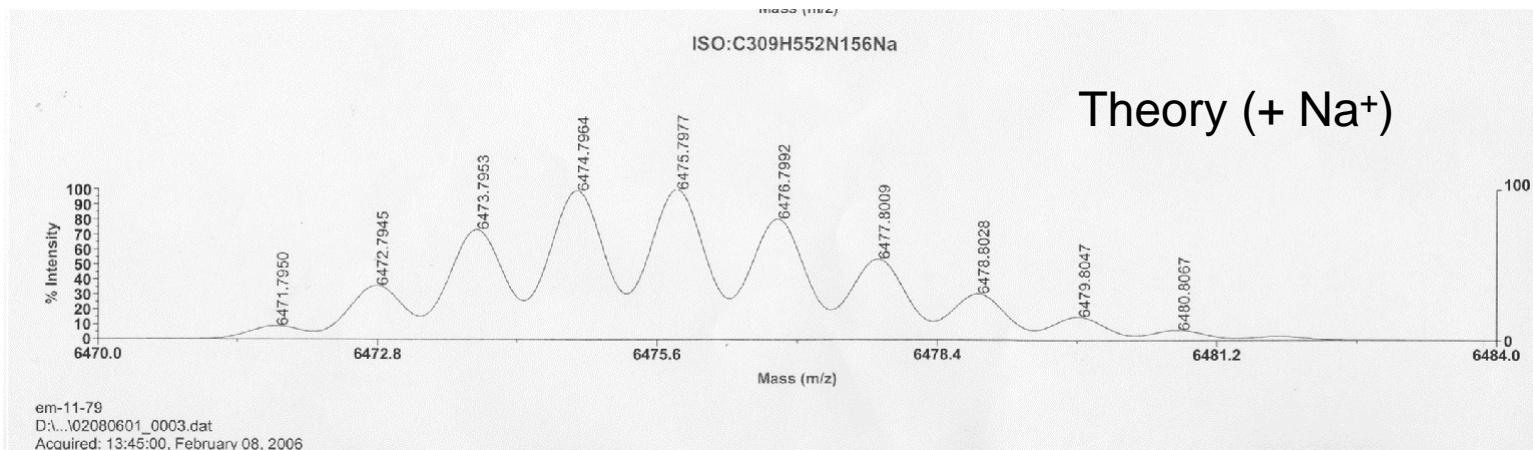

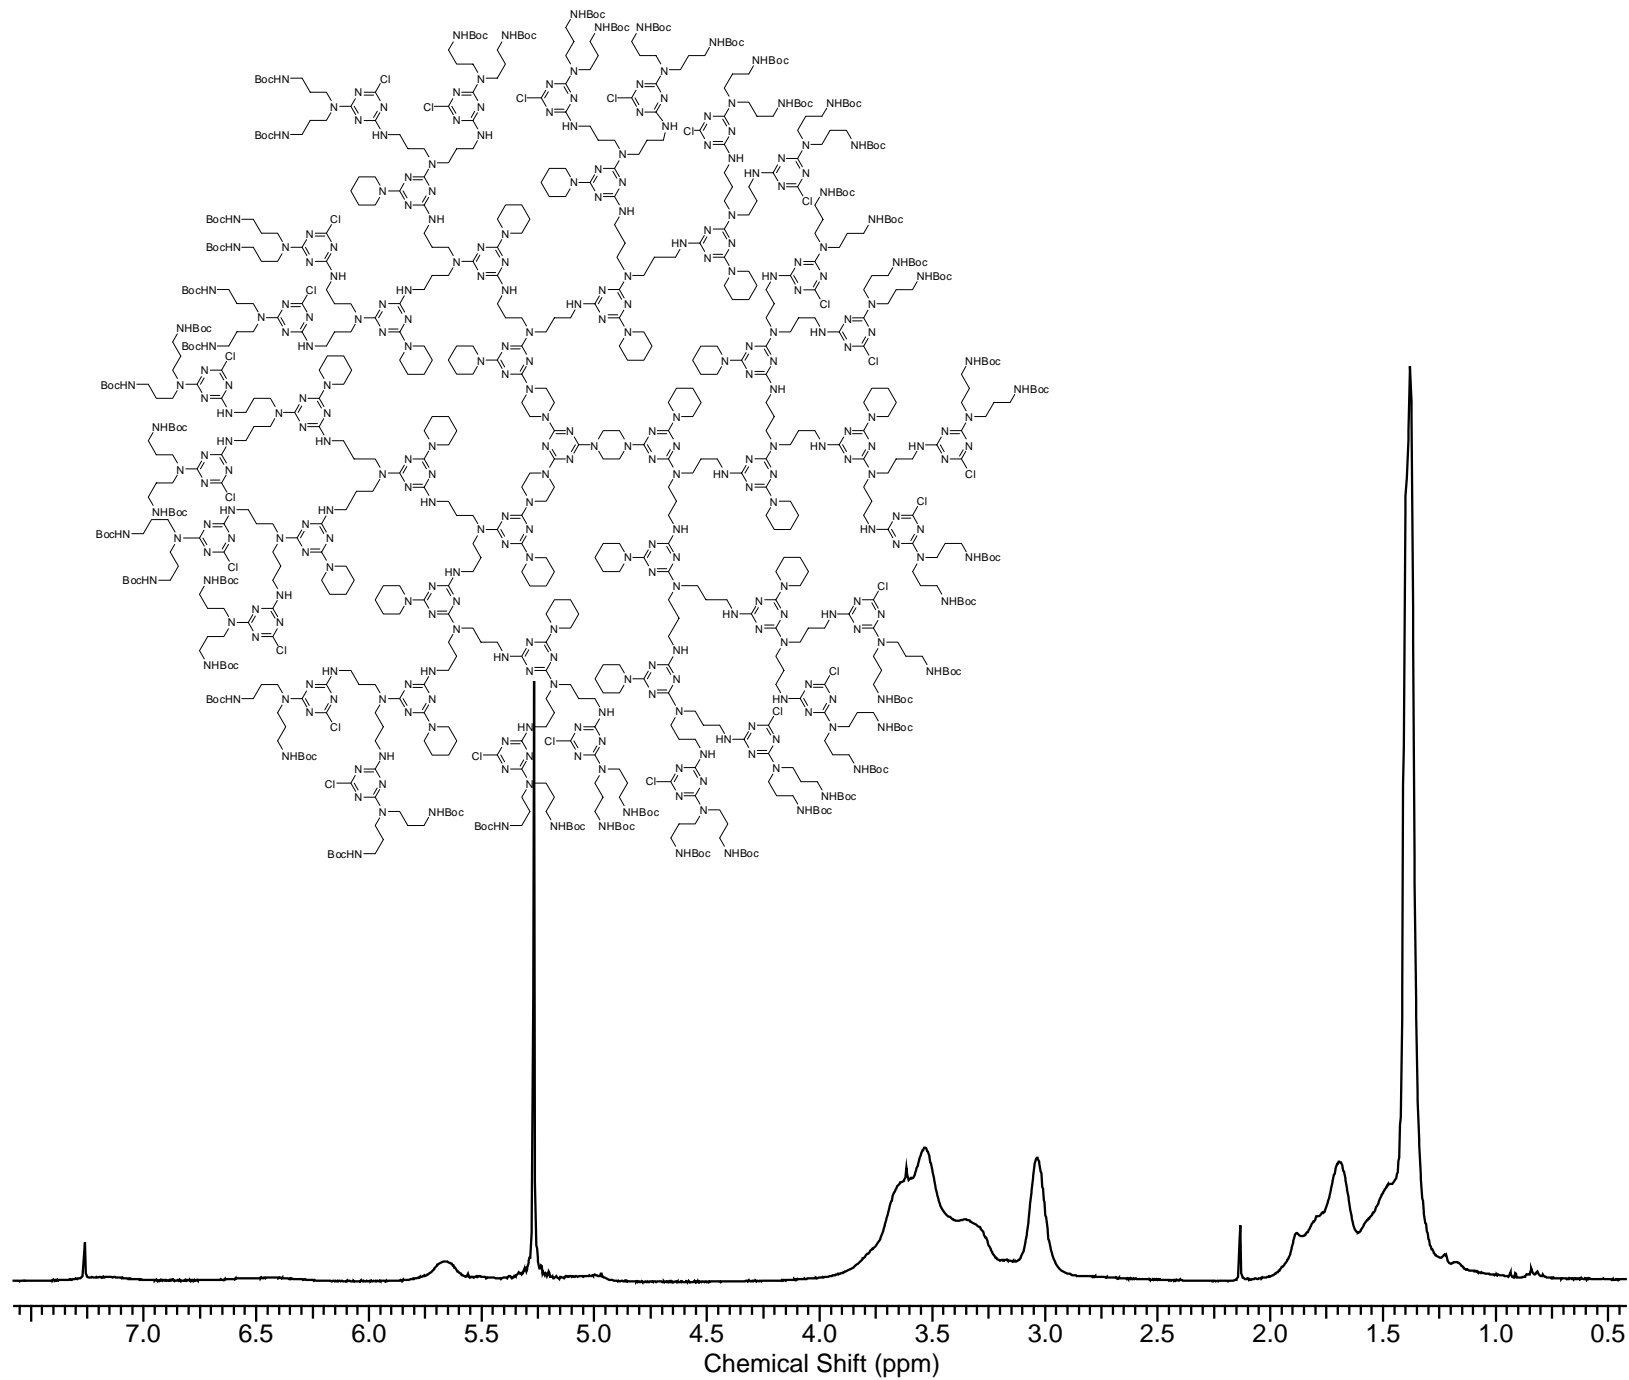

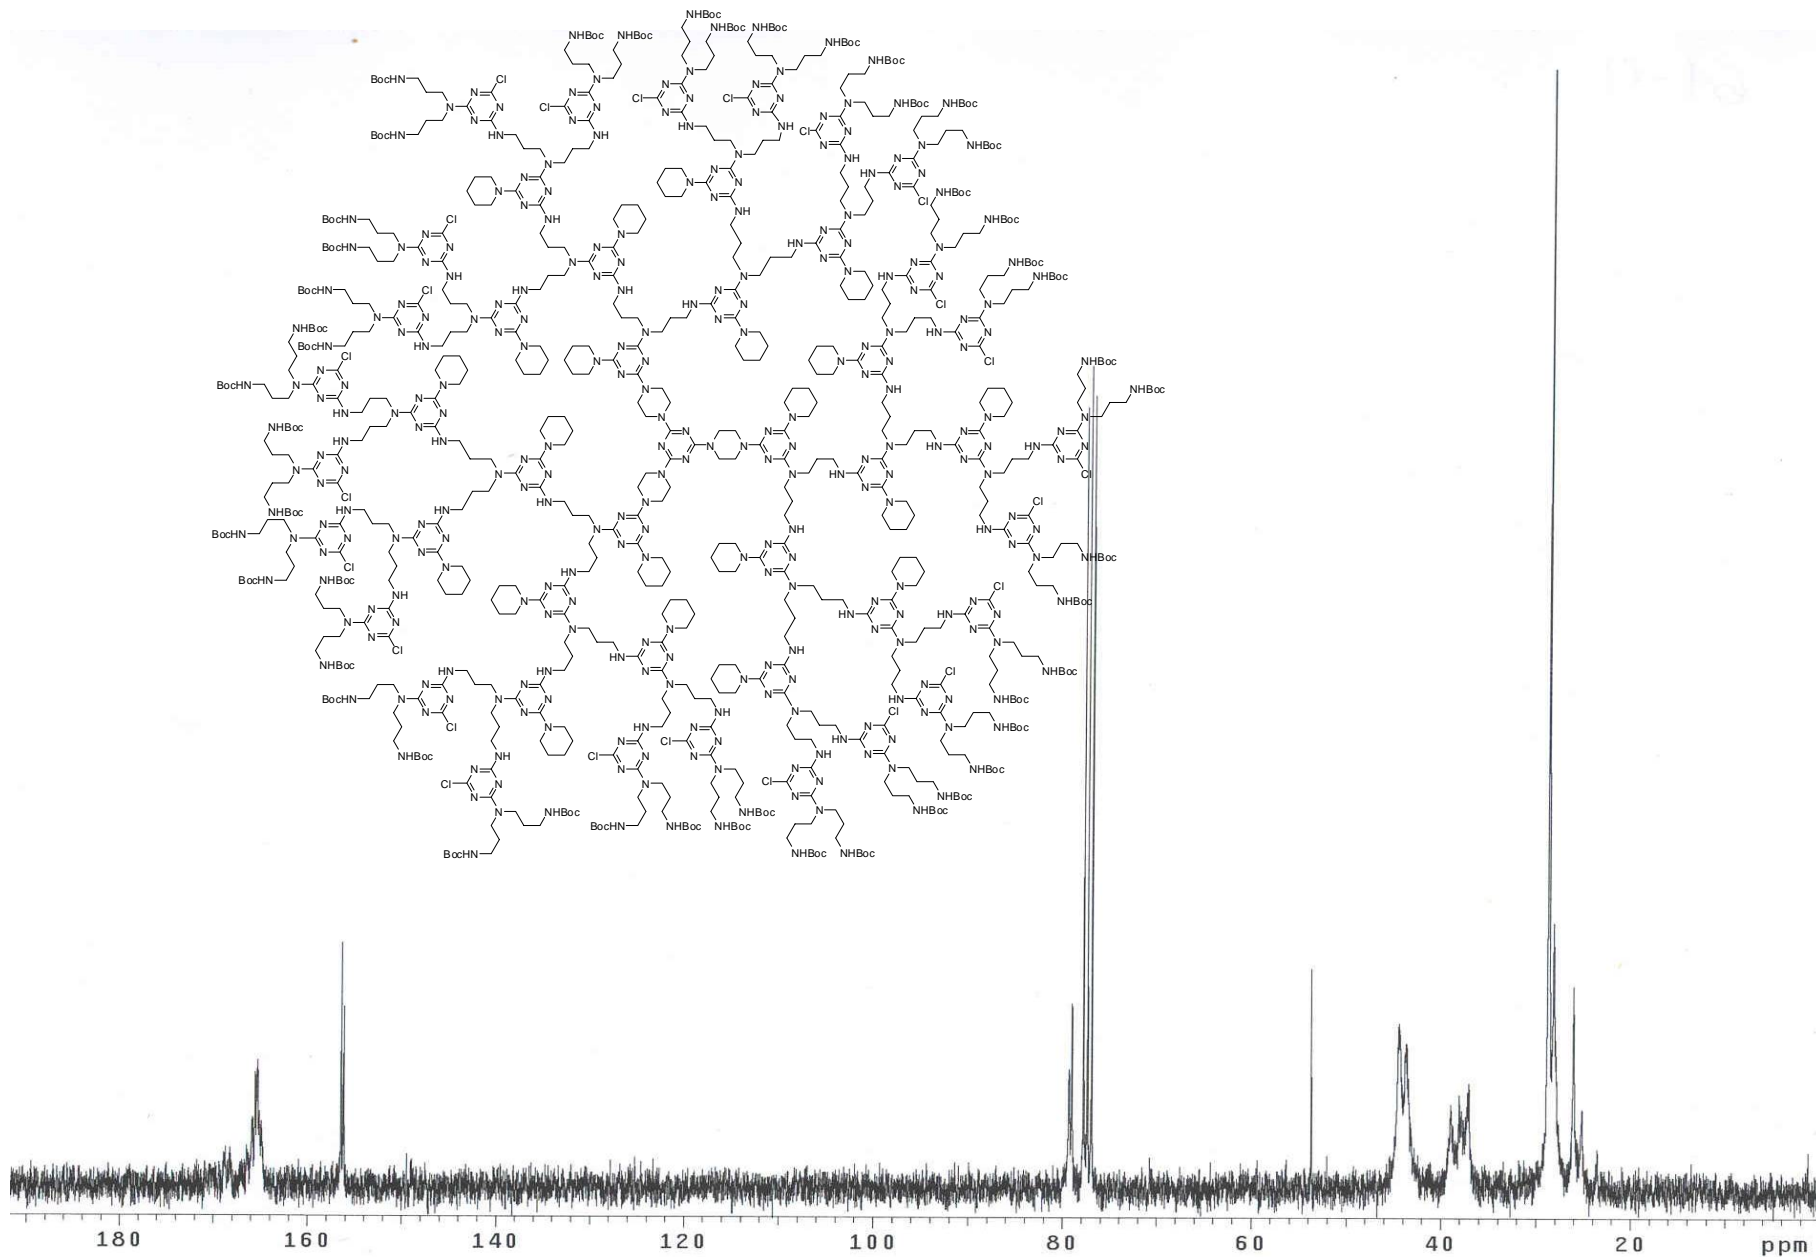

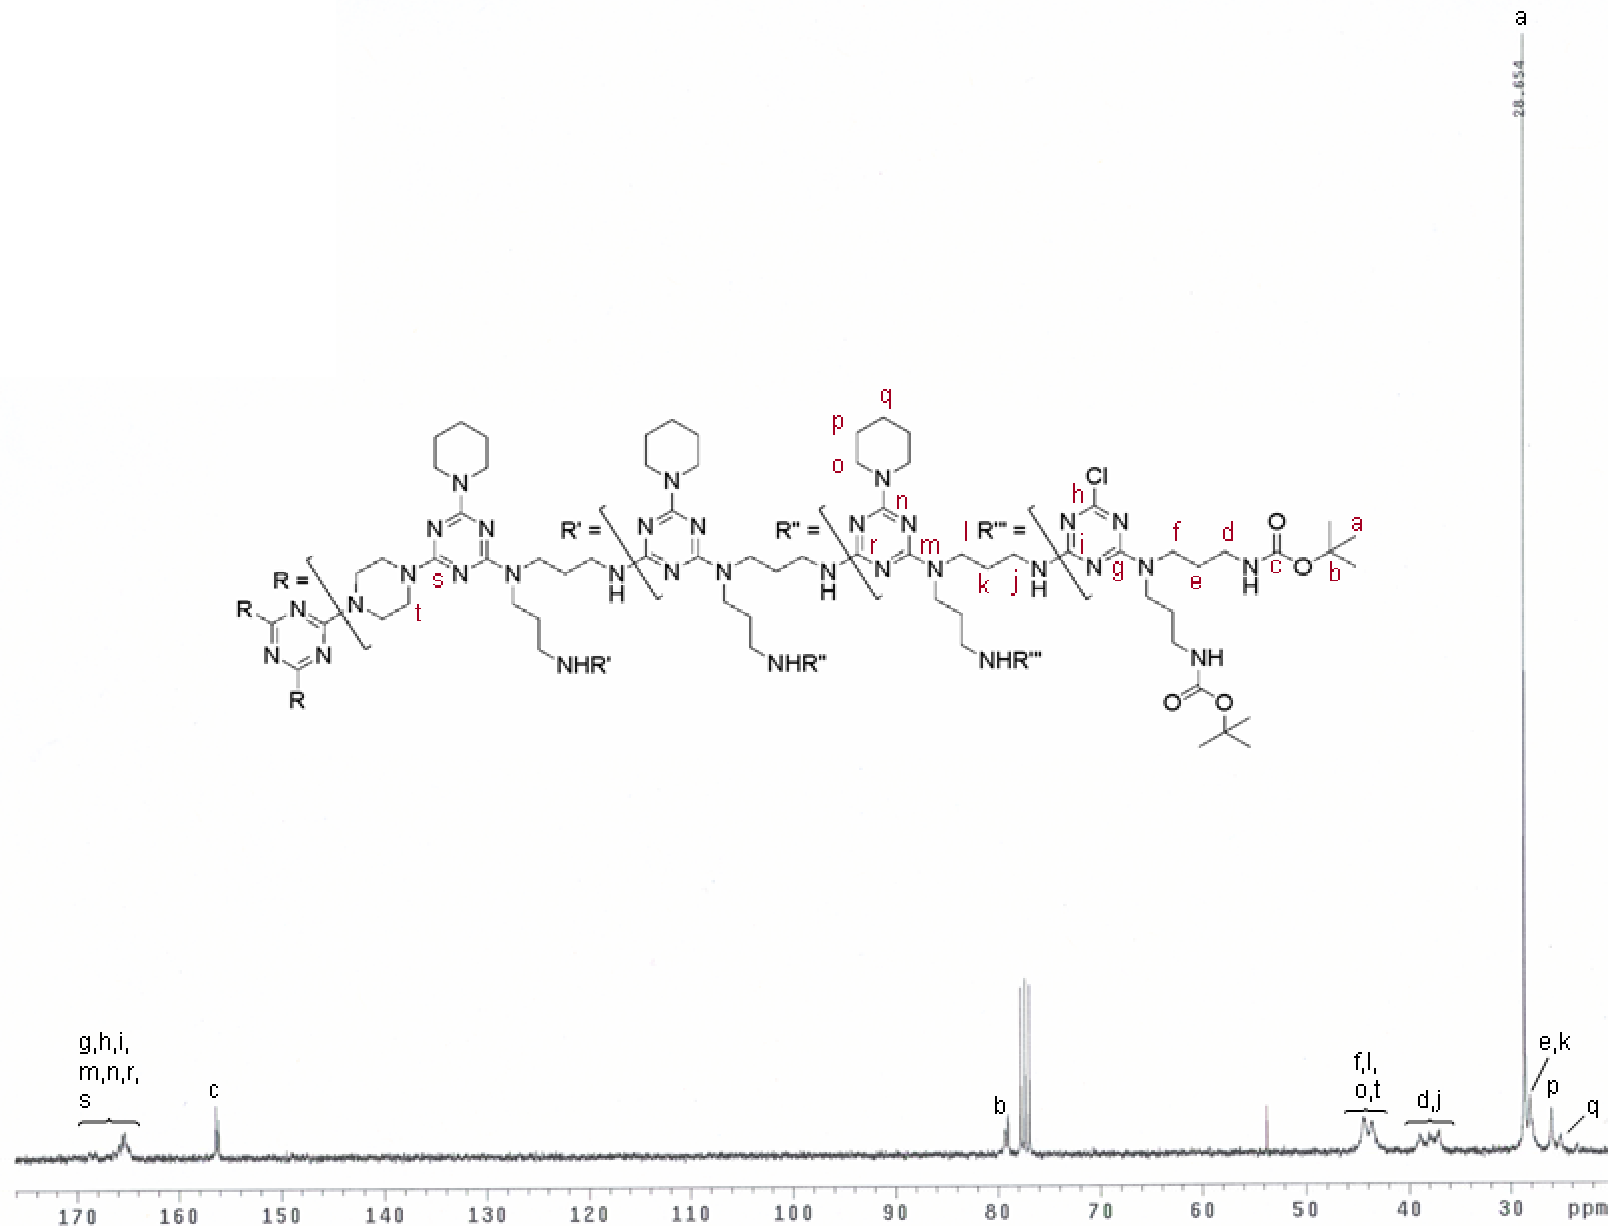



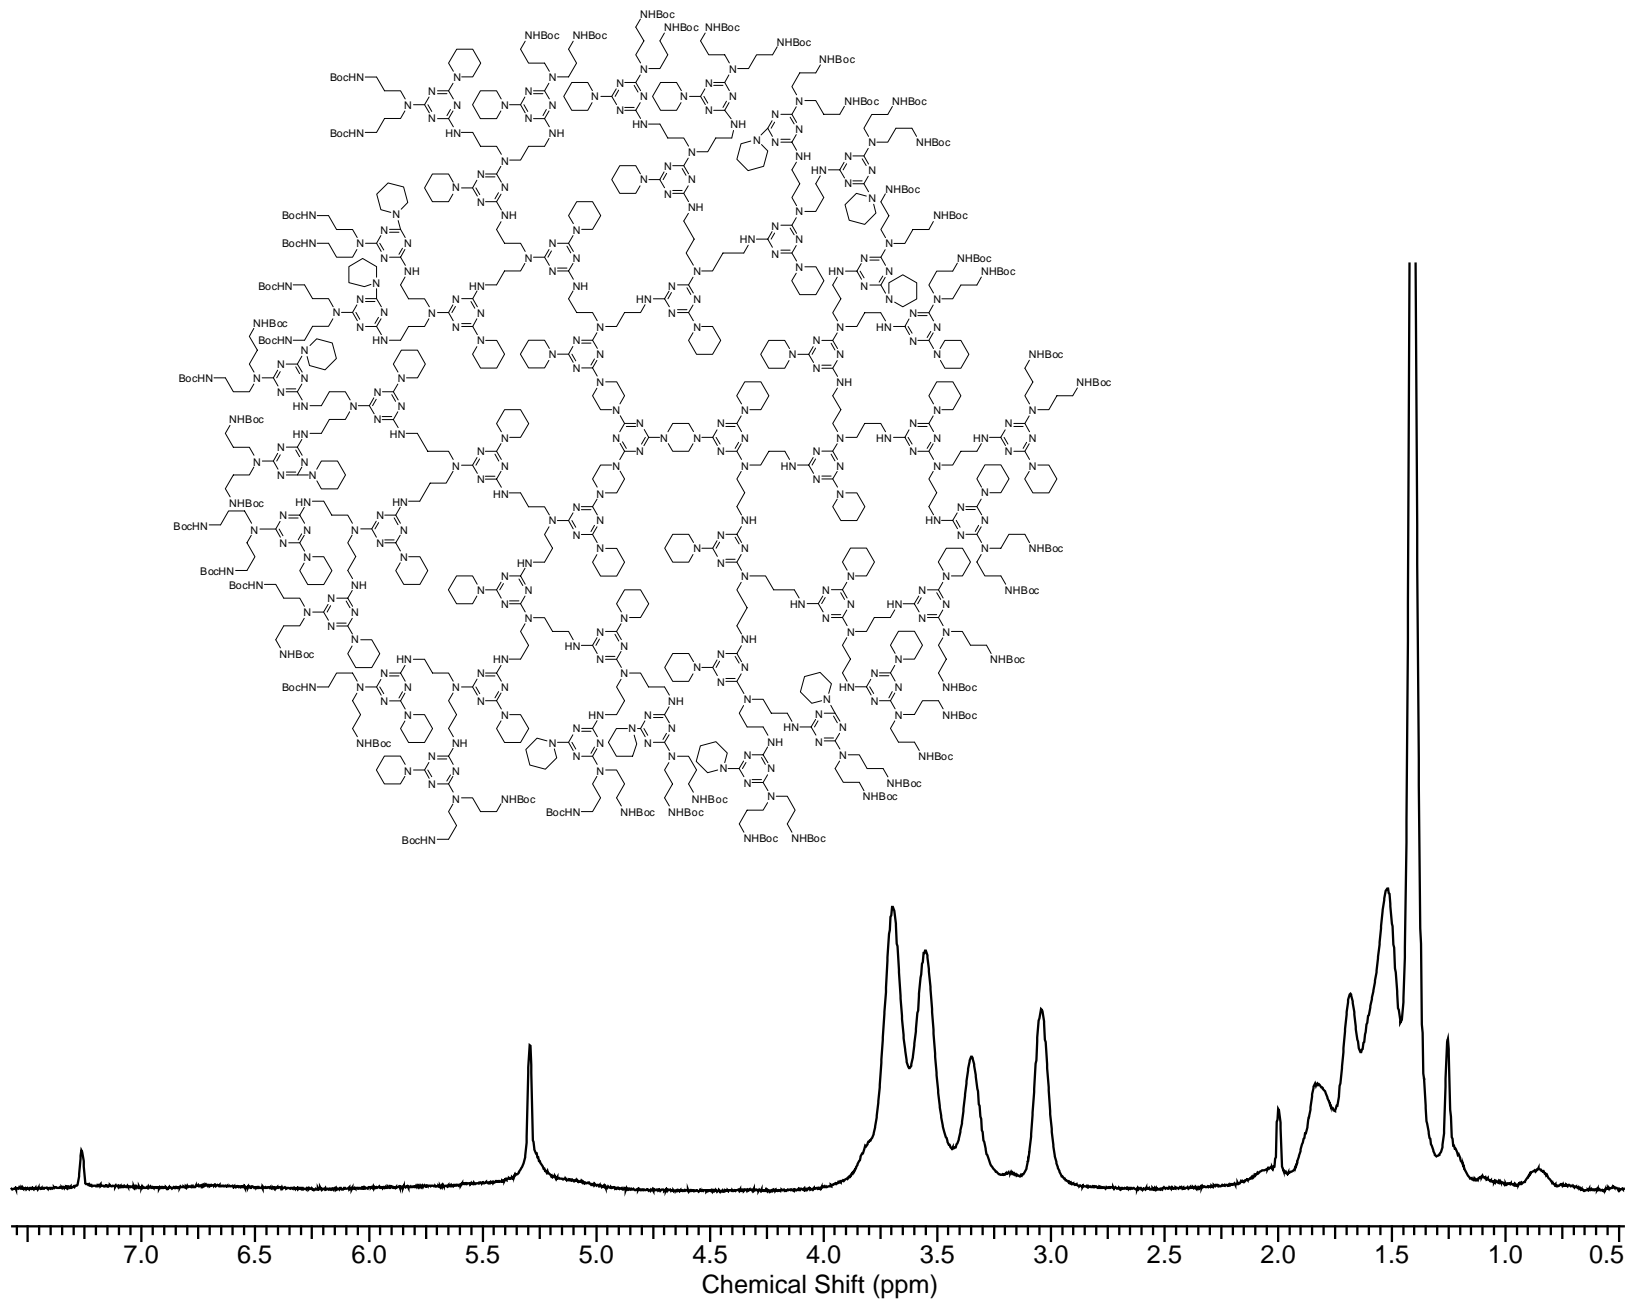

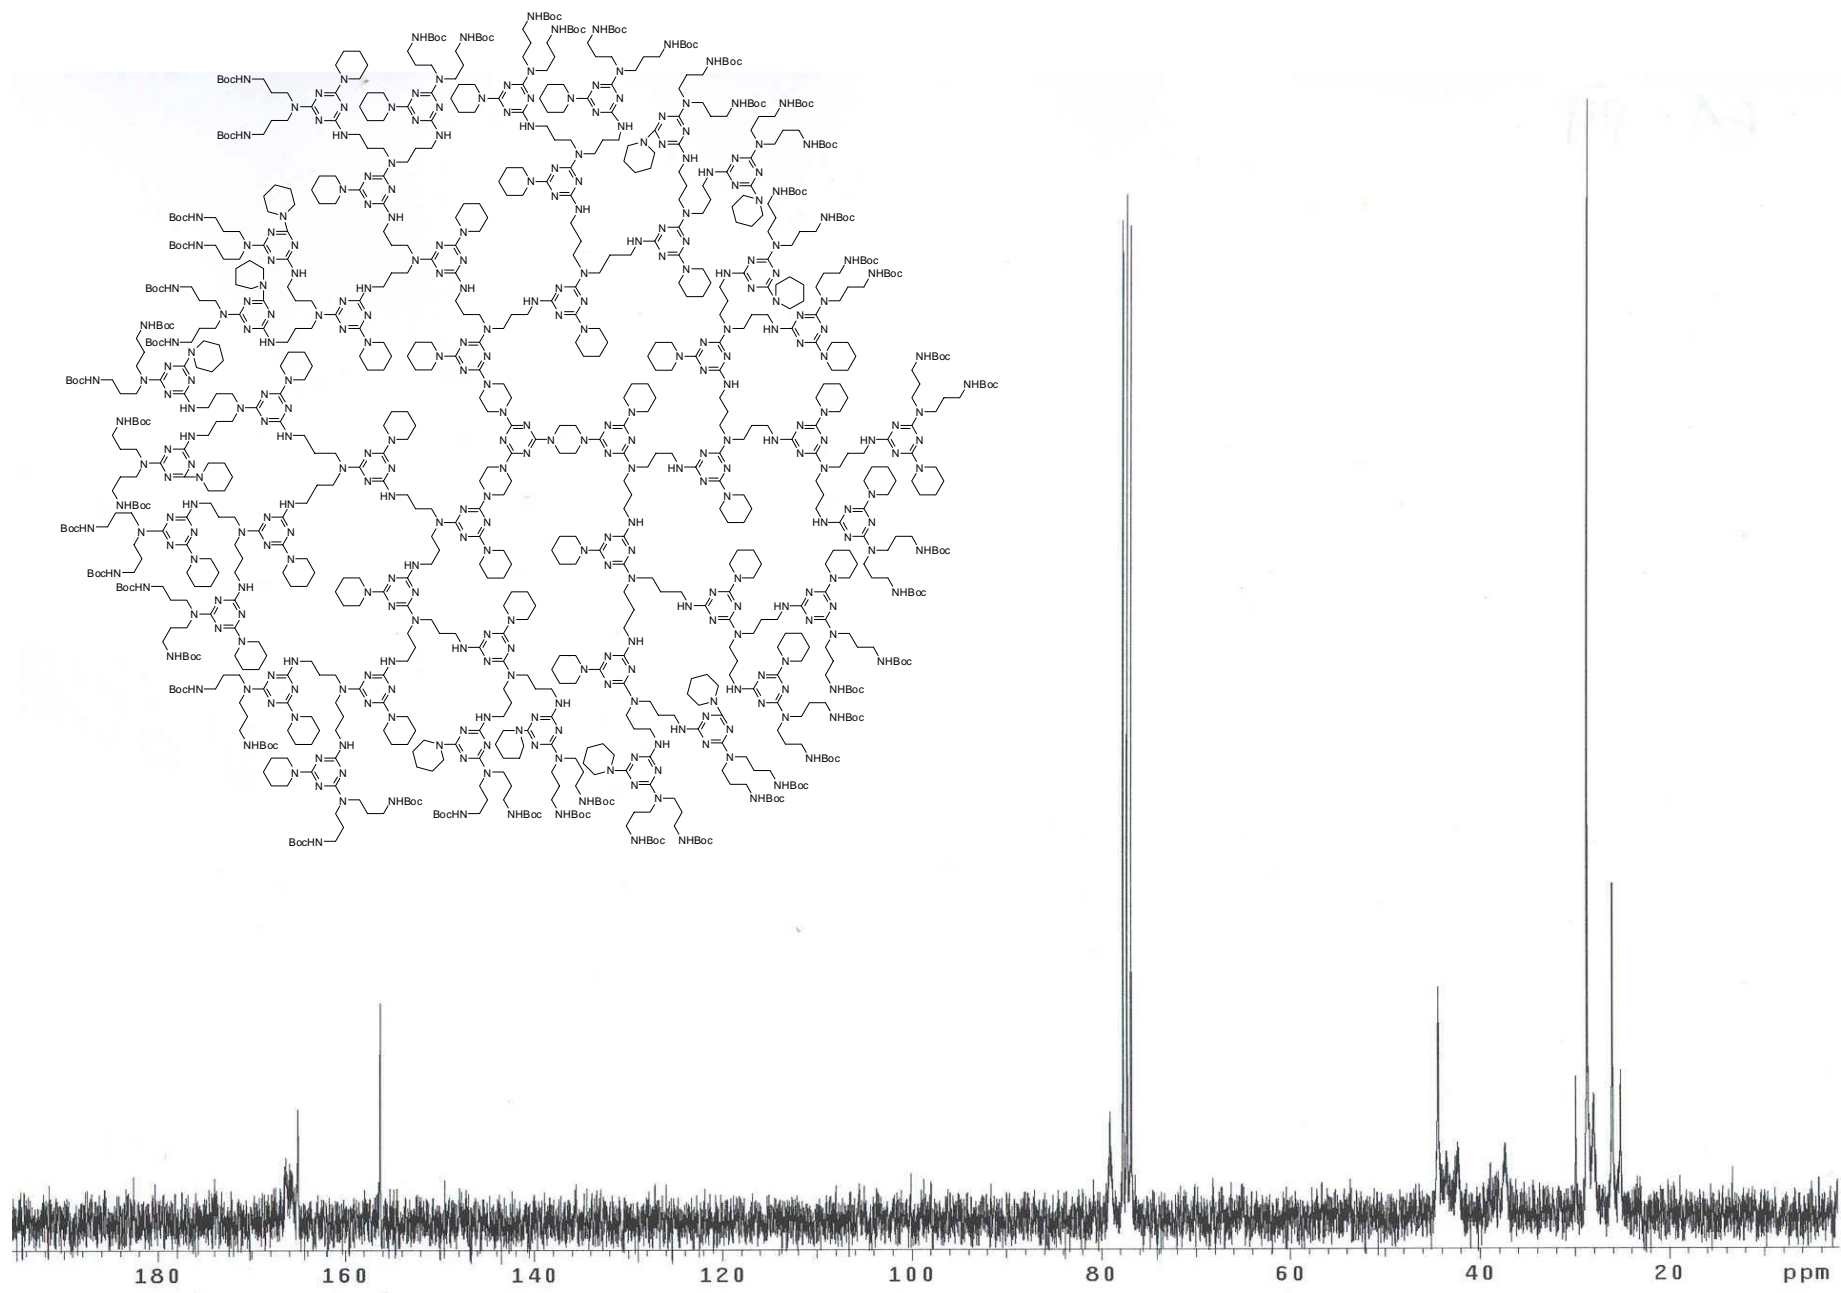



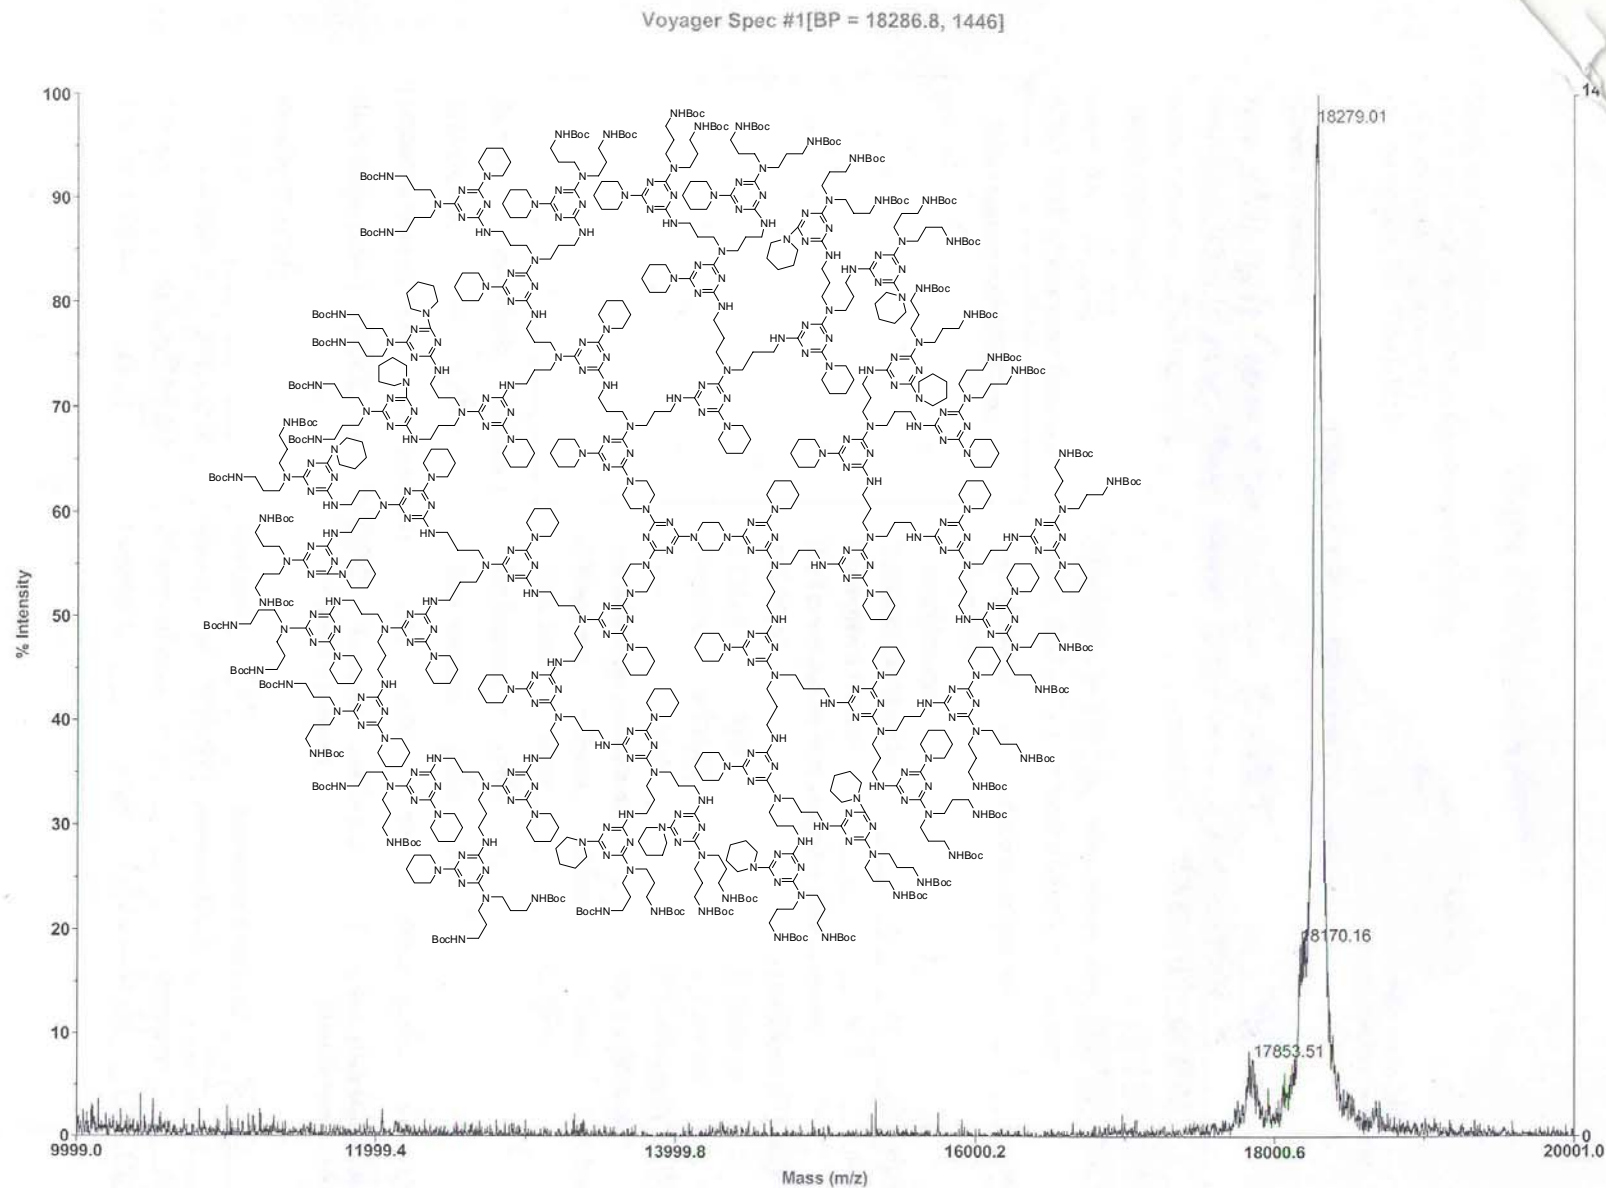

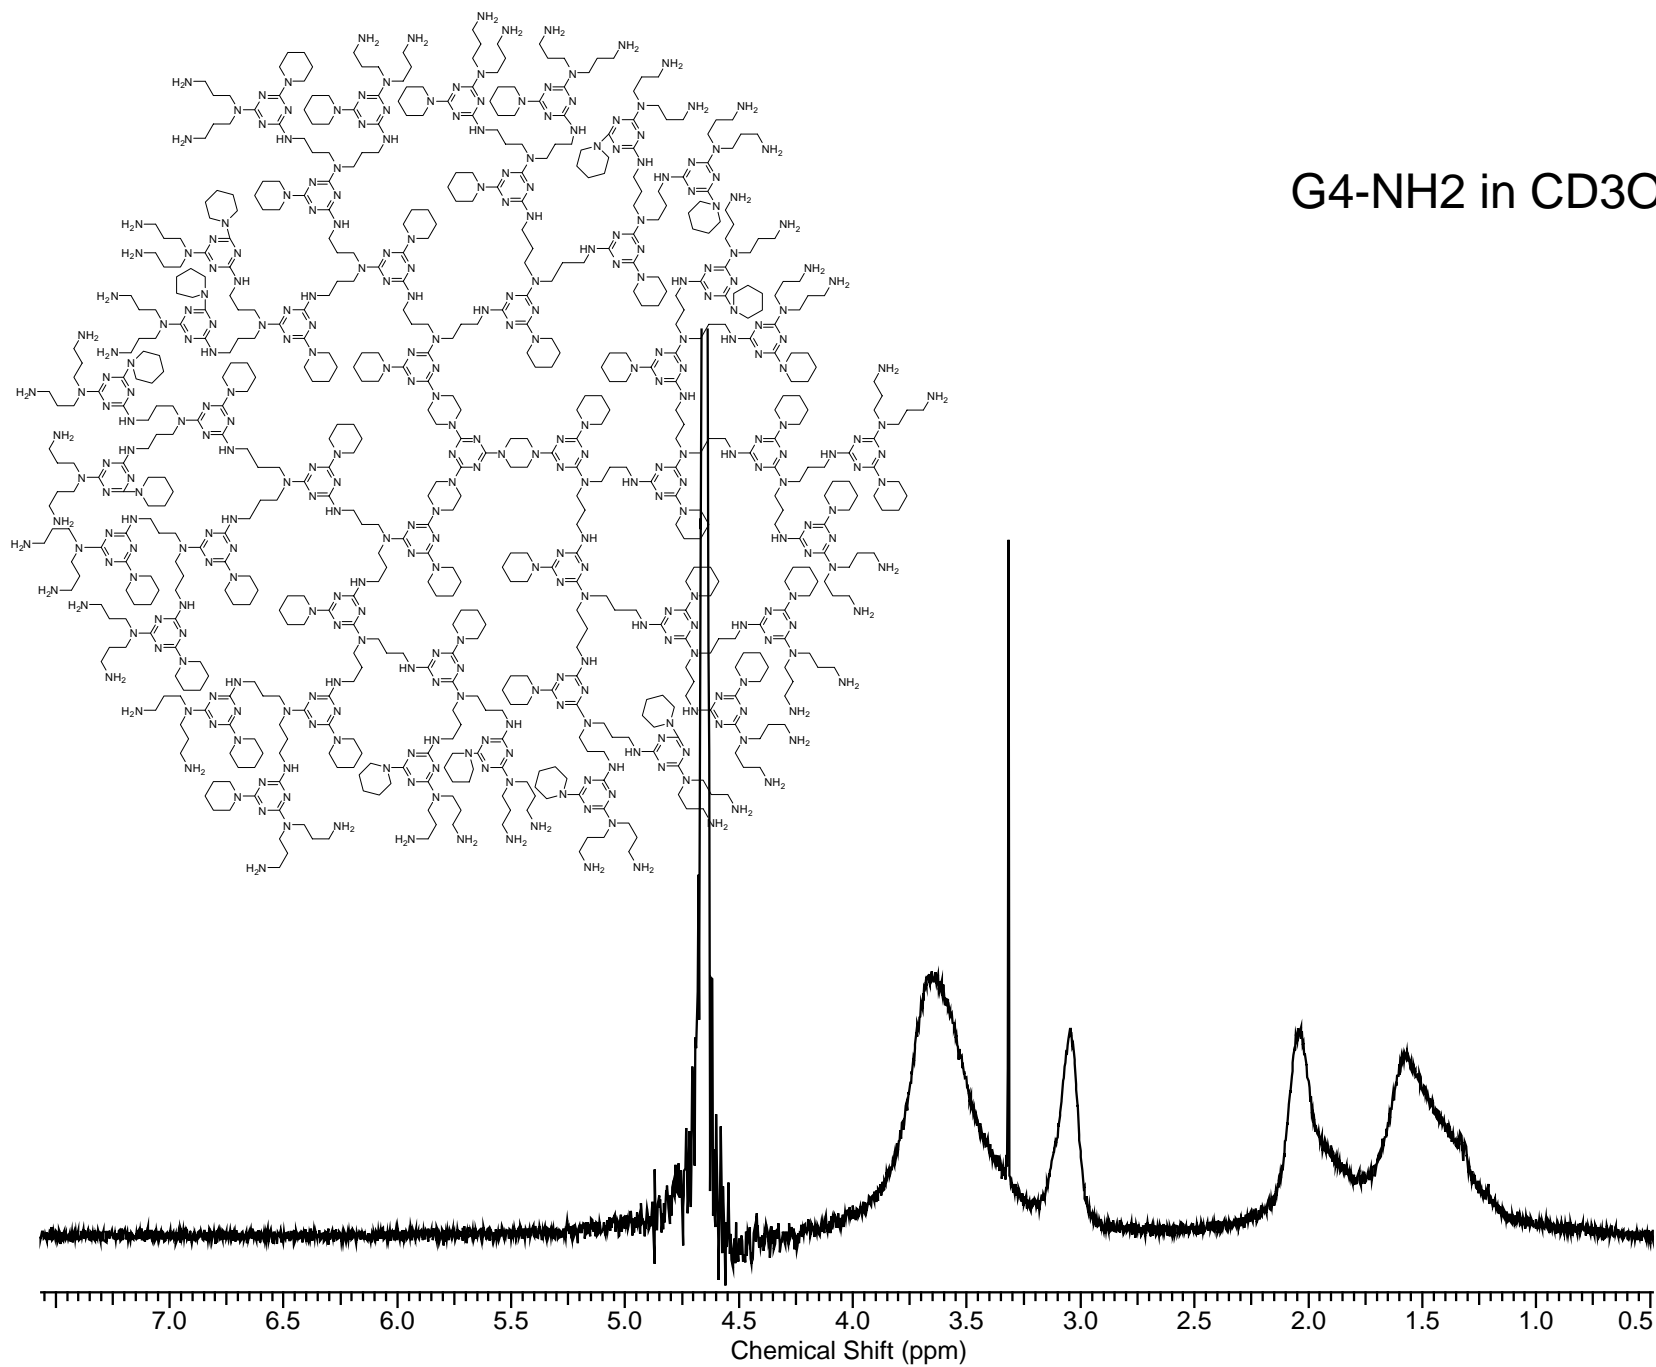



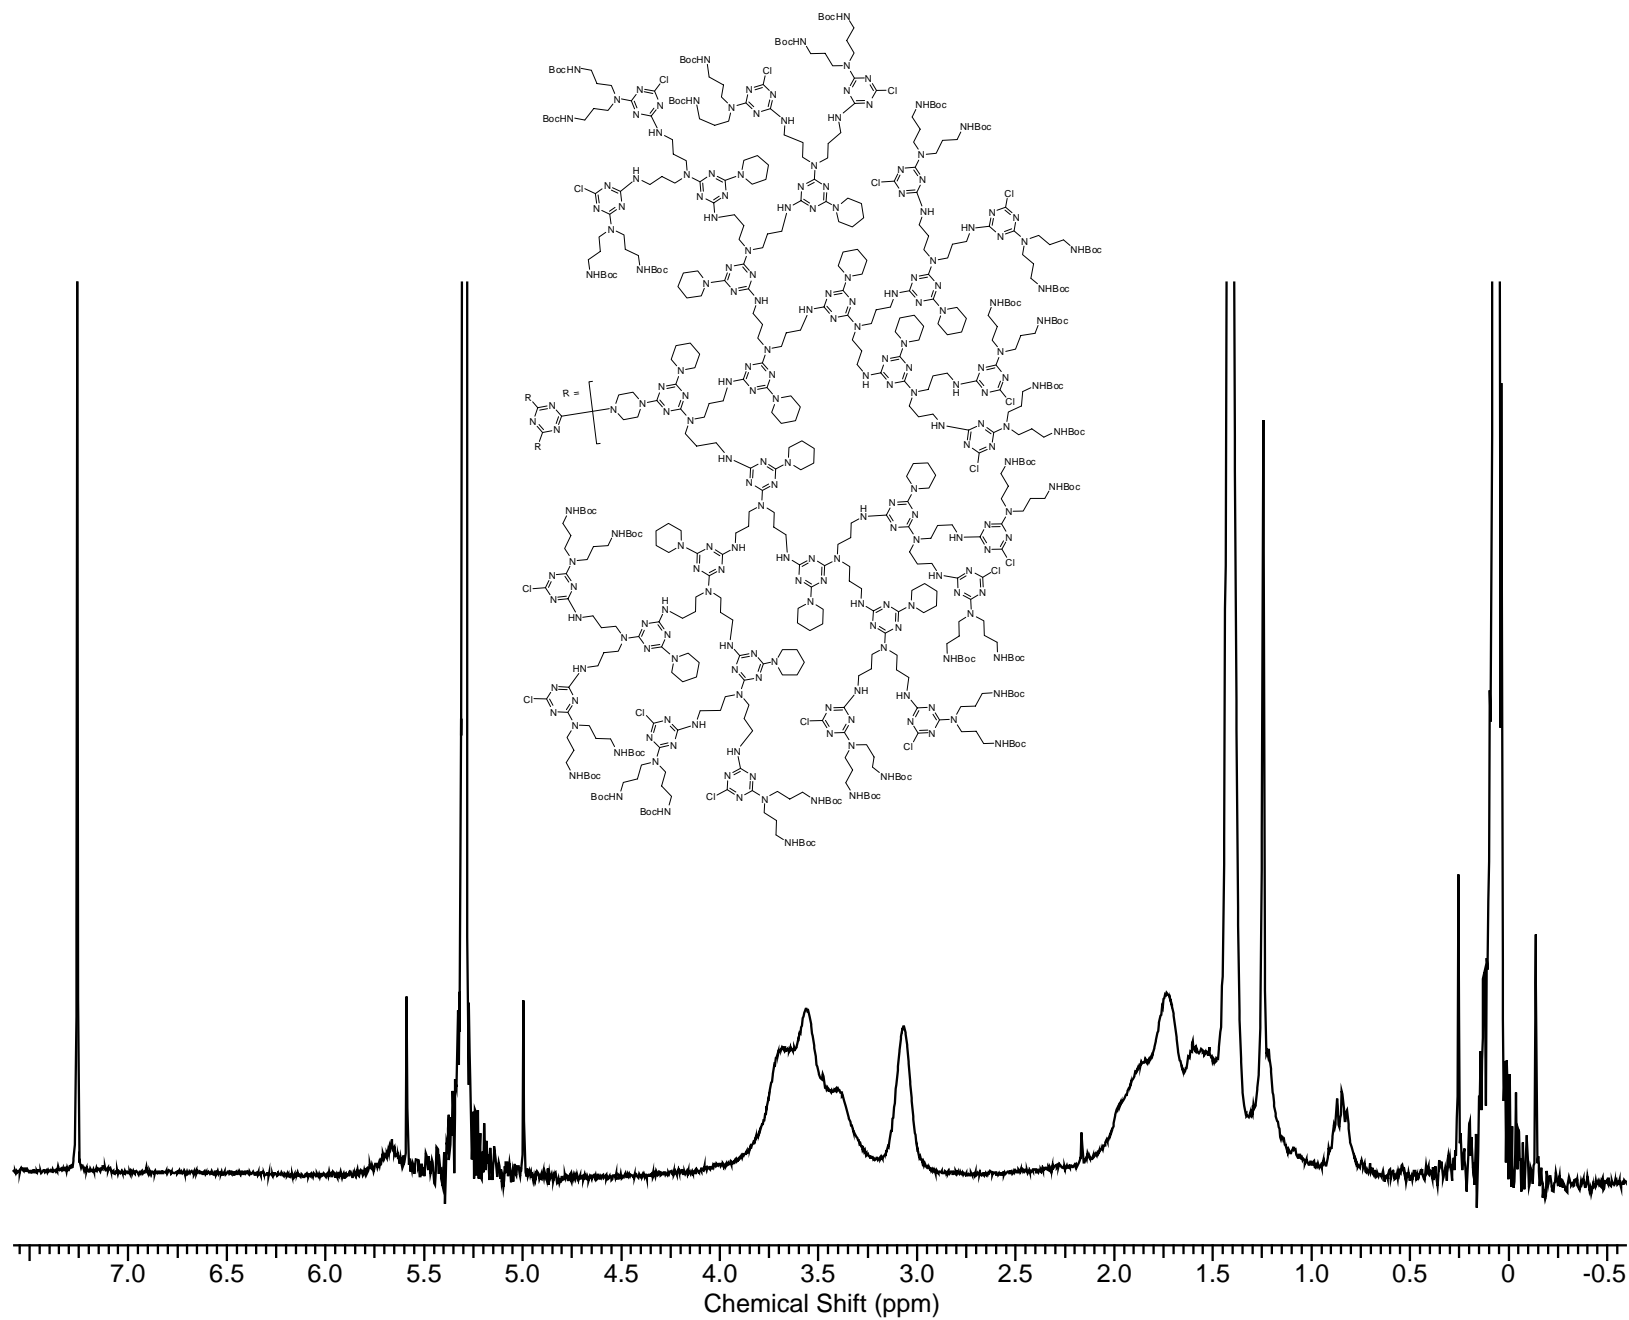

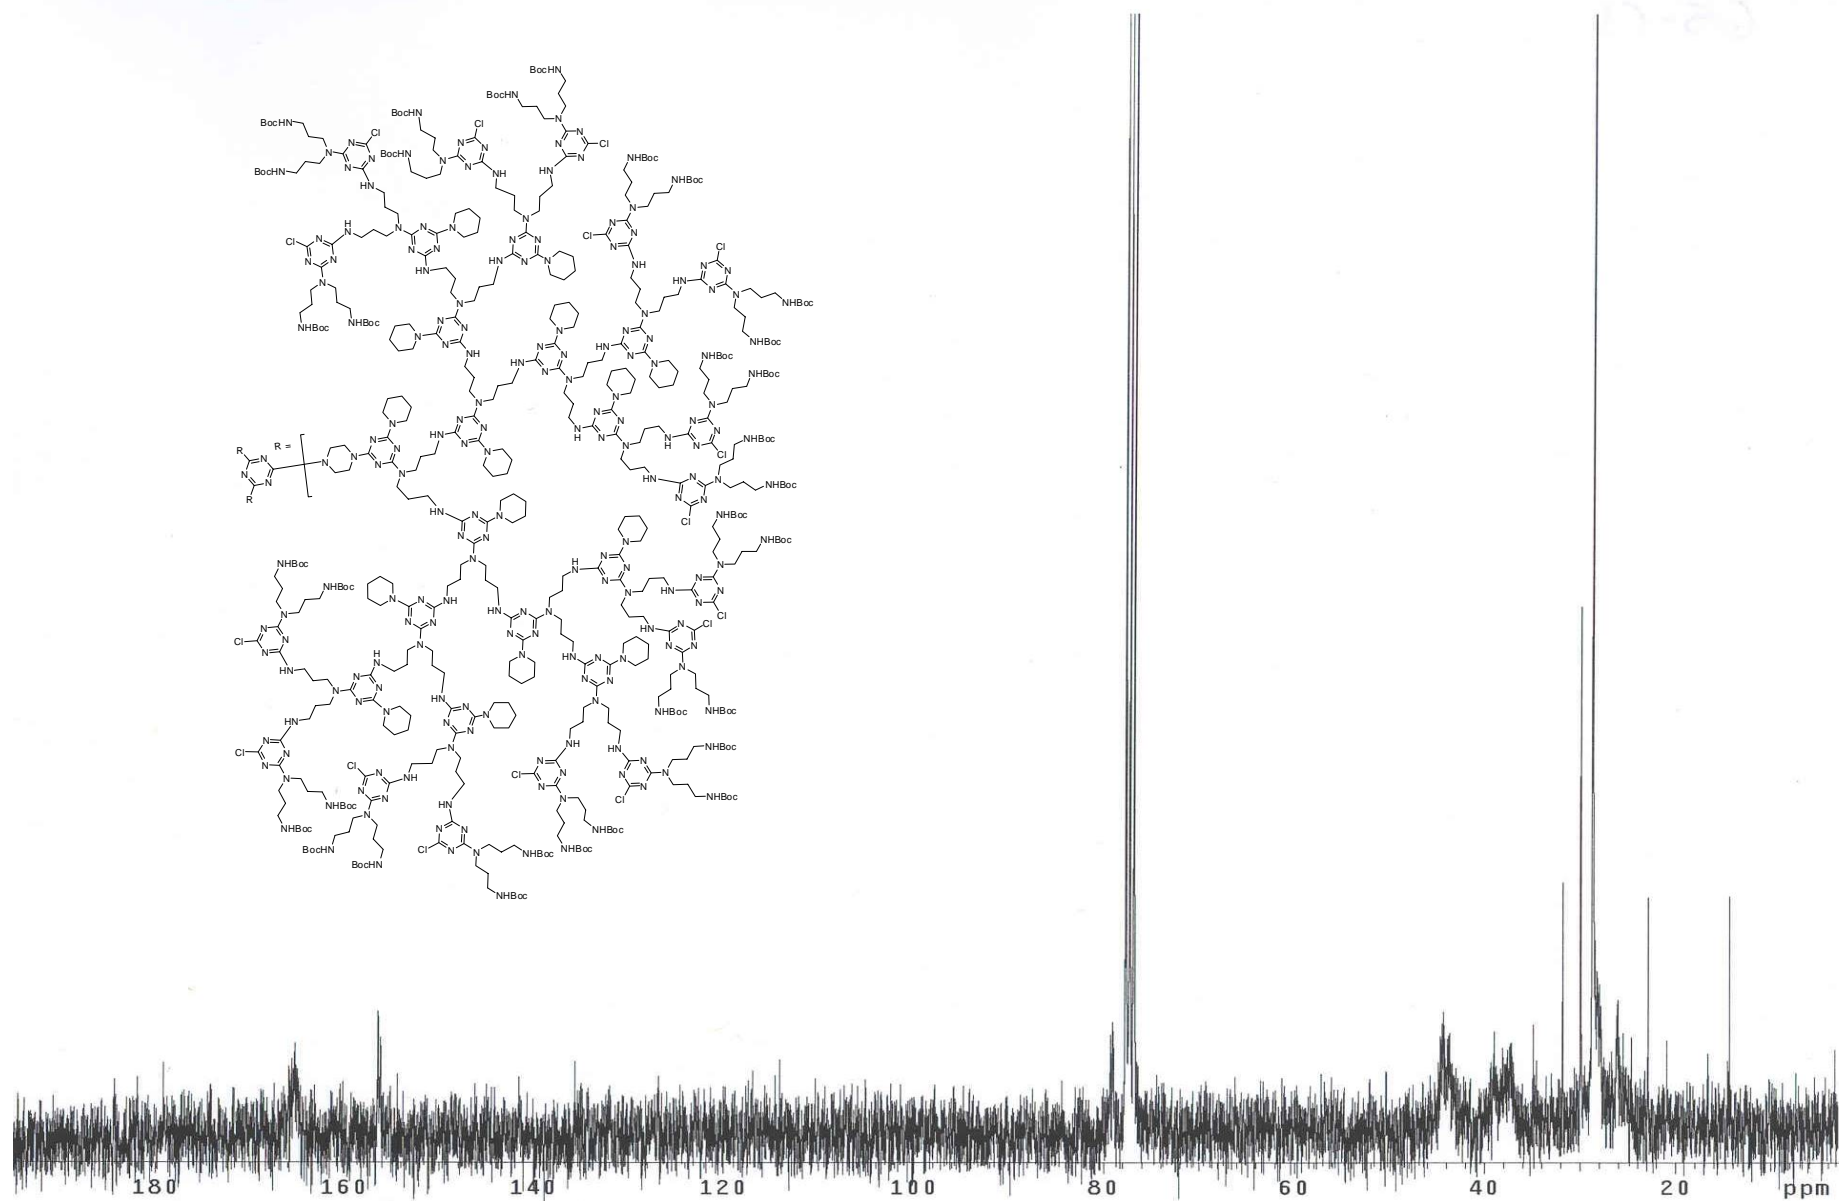

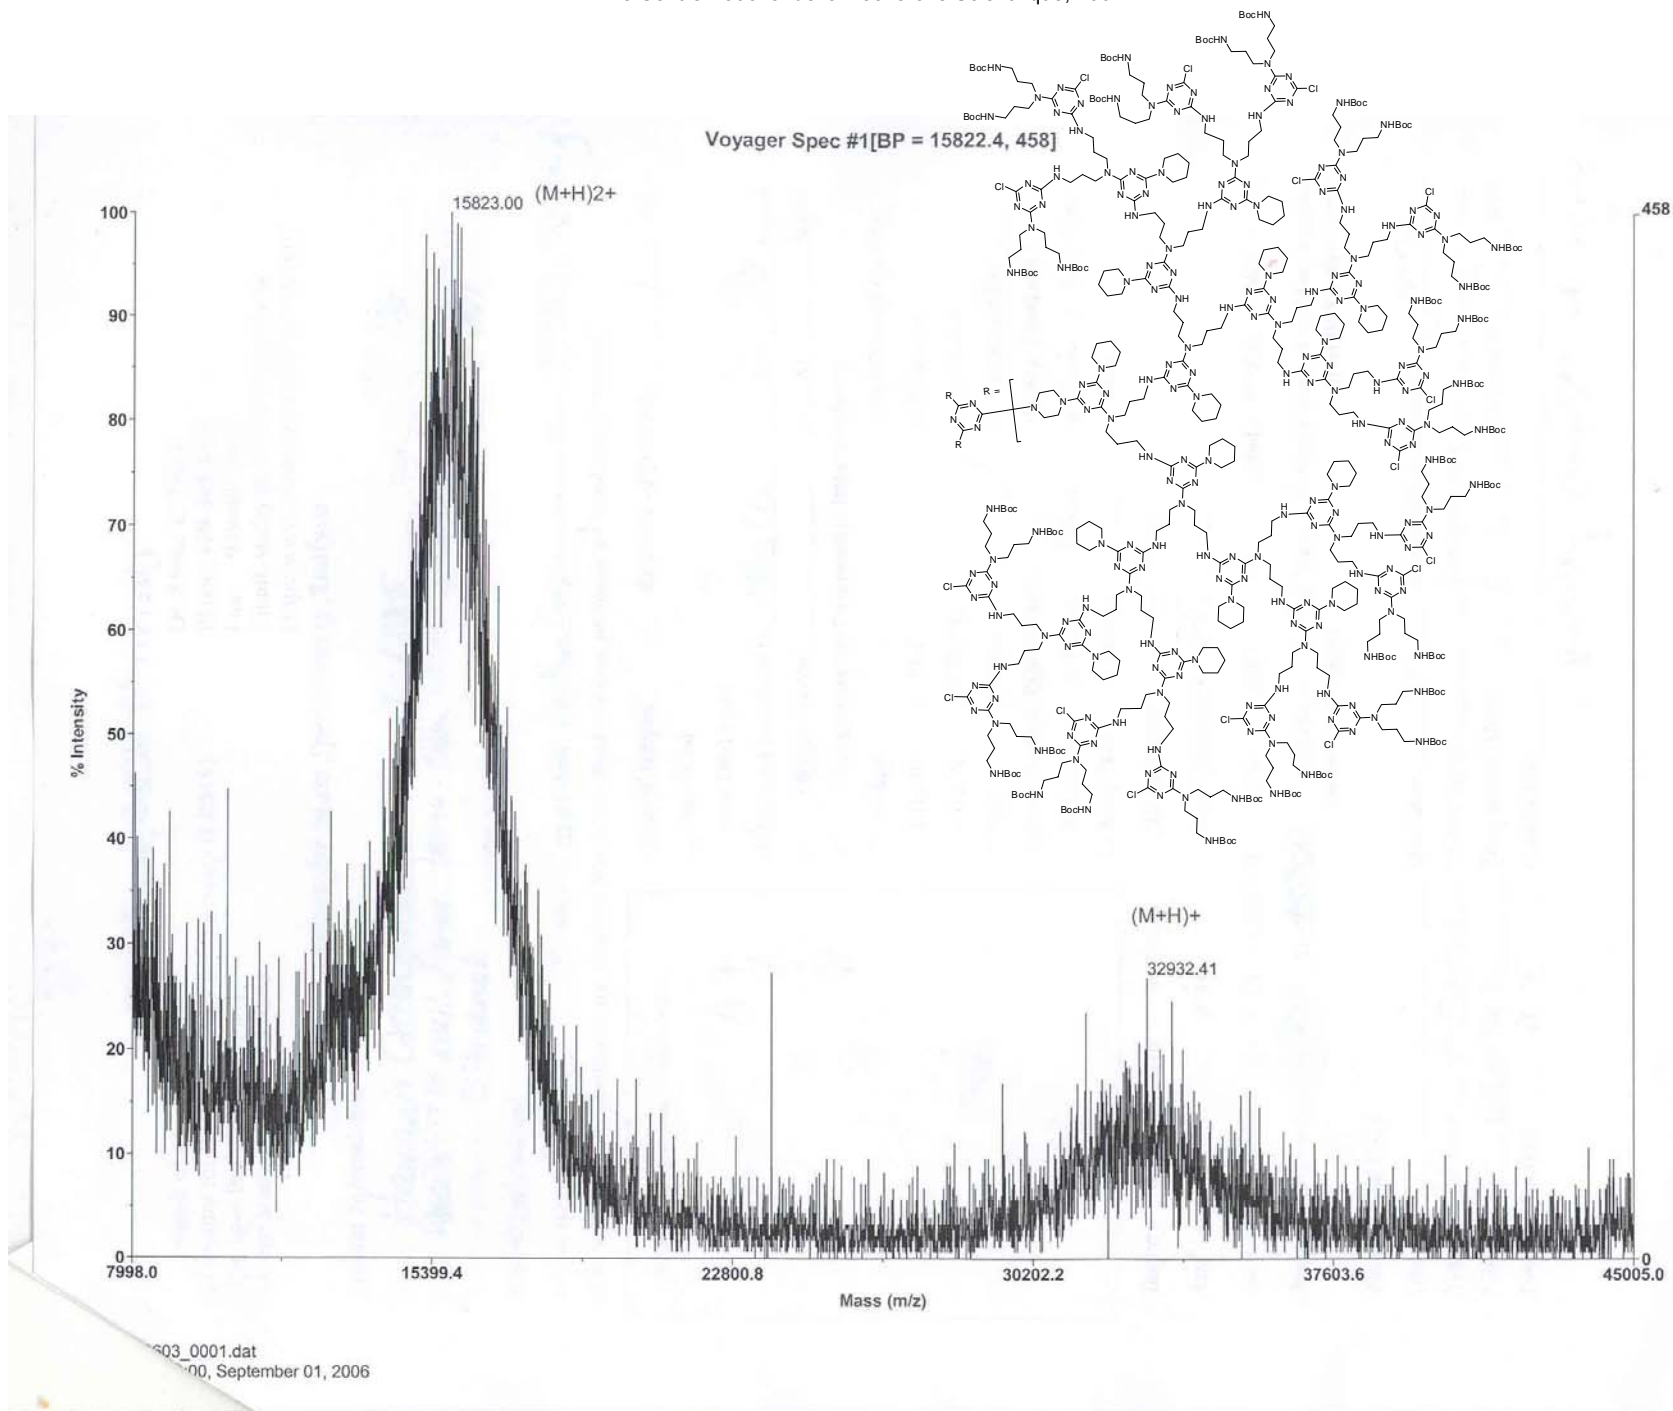

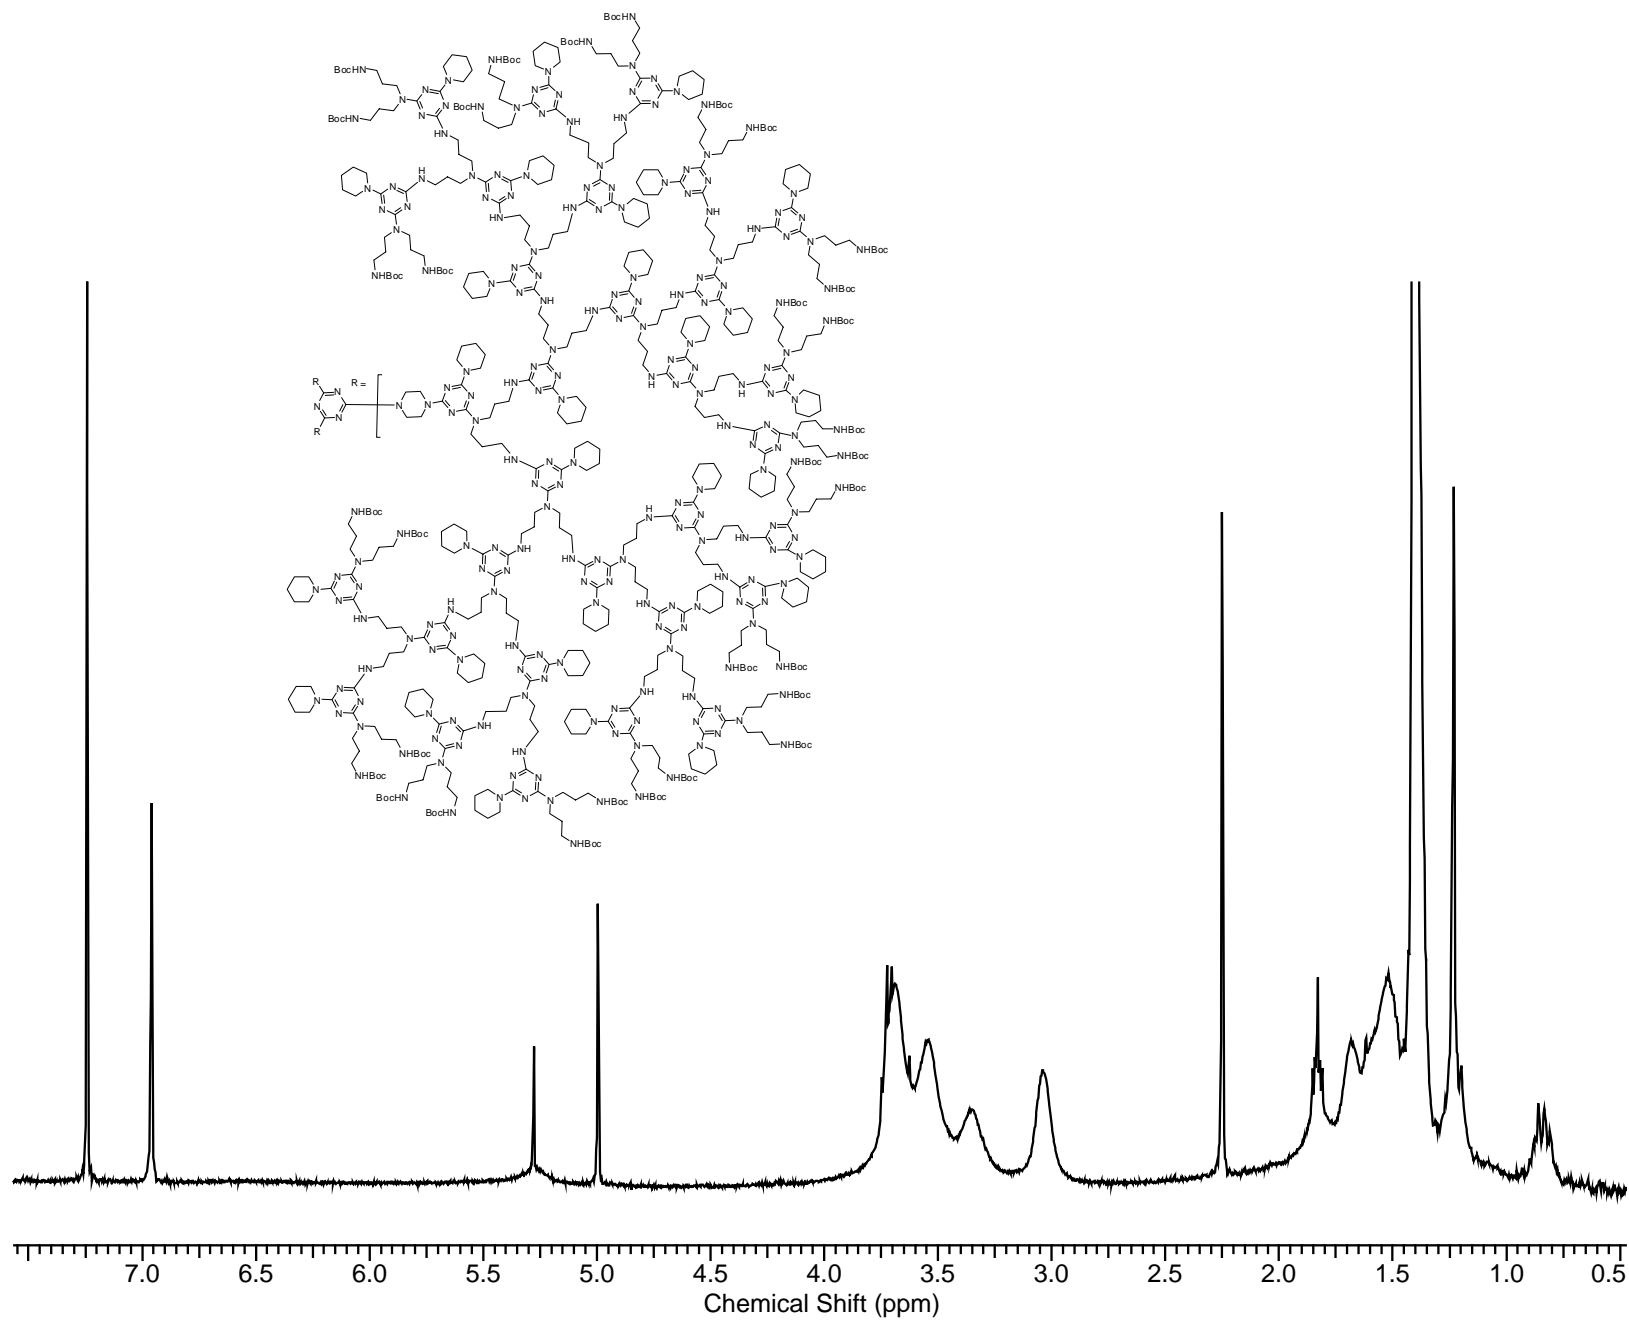

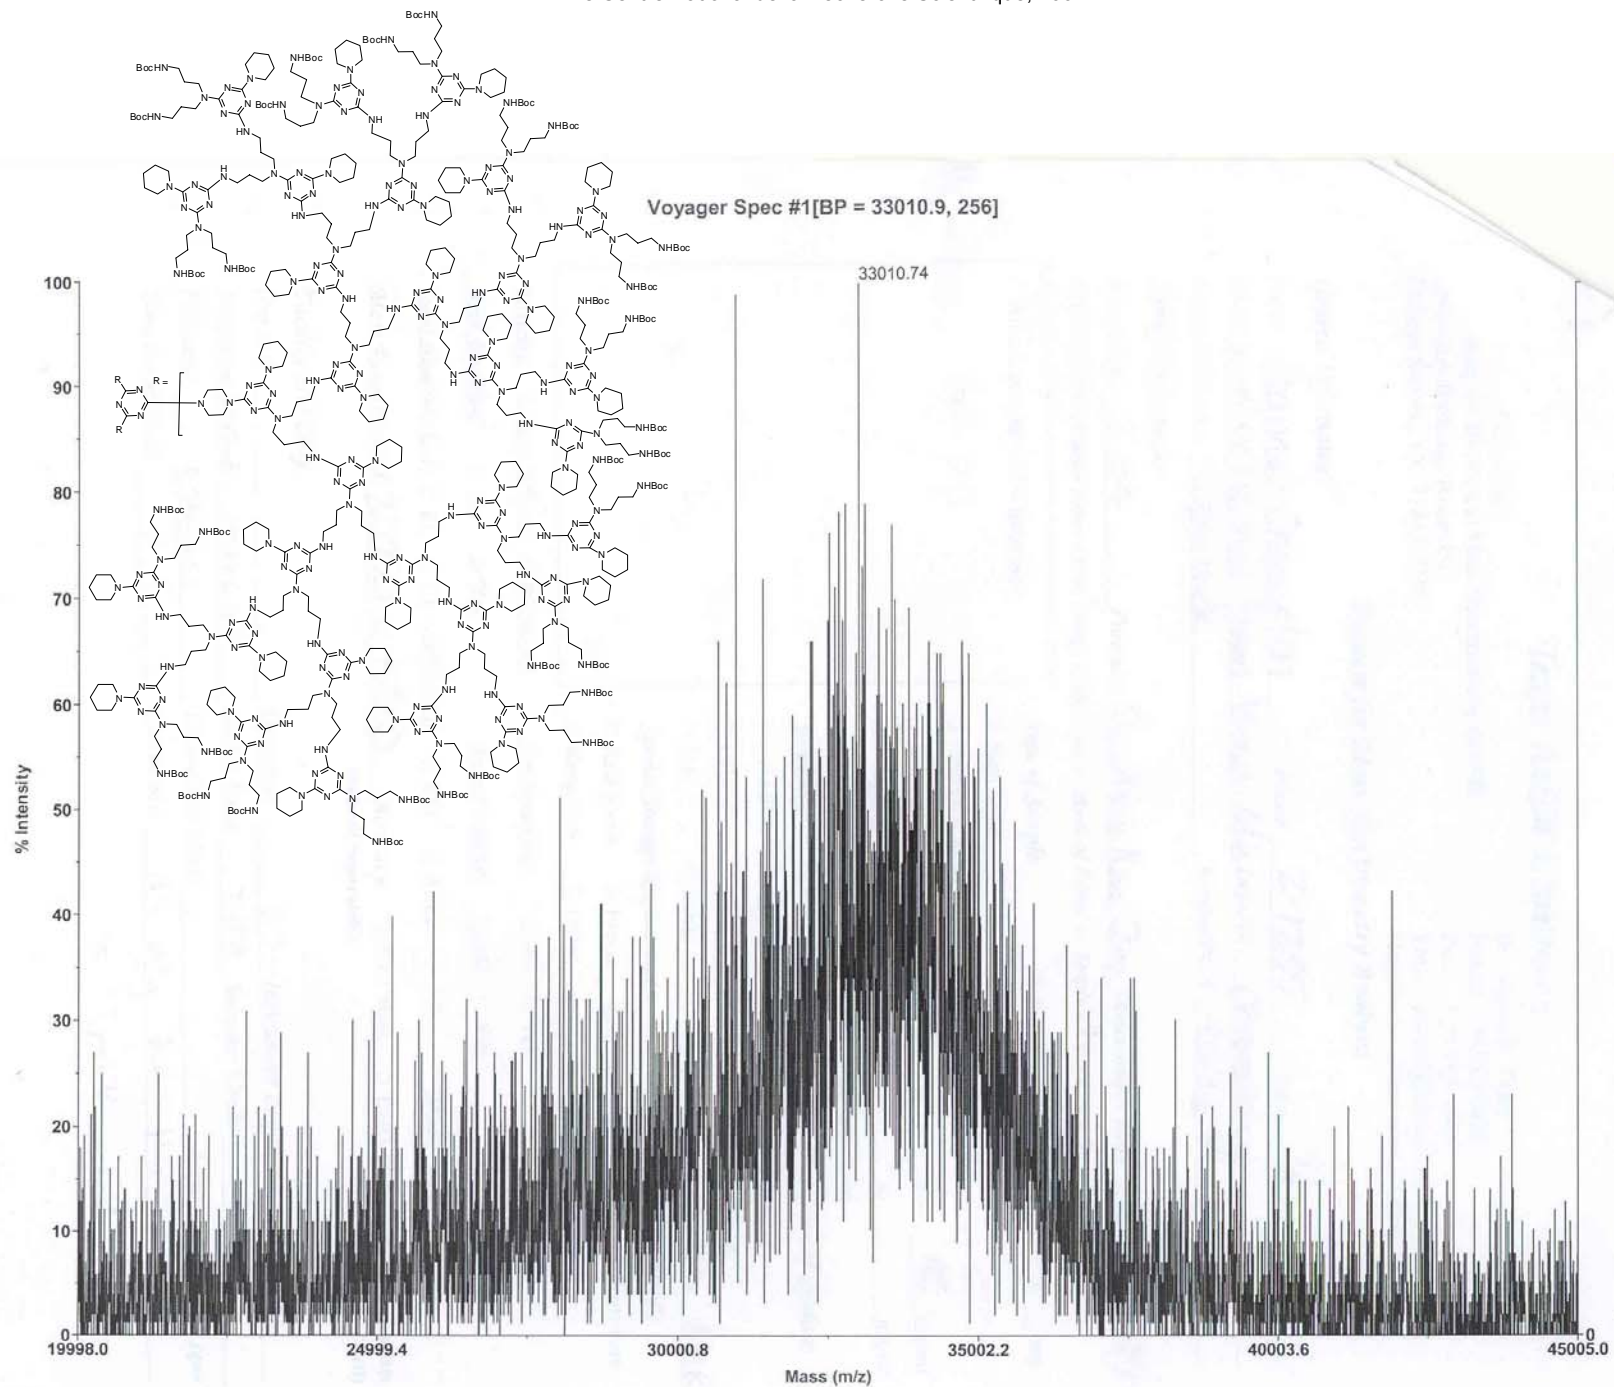



## G5-Pip<sub>93</sub>(NH<sub>2</sub>)<sub>96</sub> in CD<sub>3</sub>OD

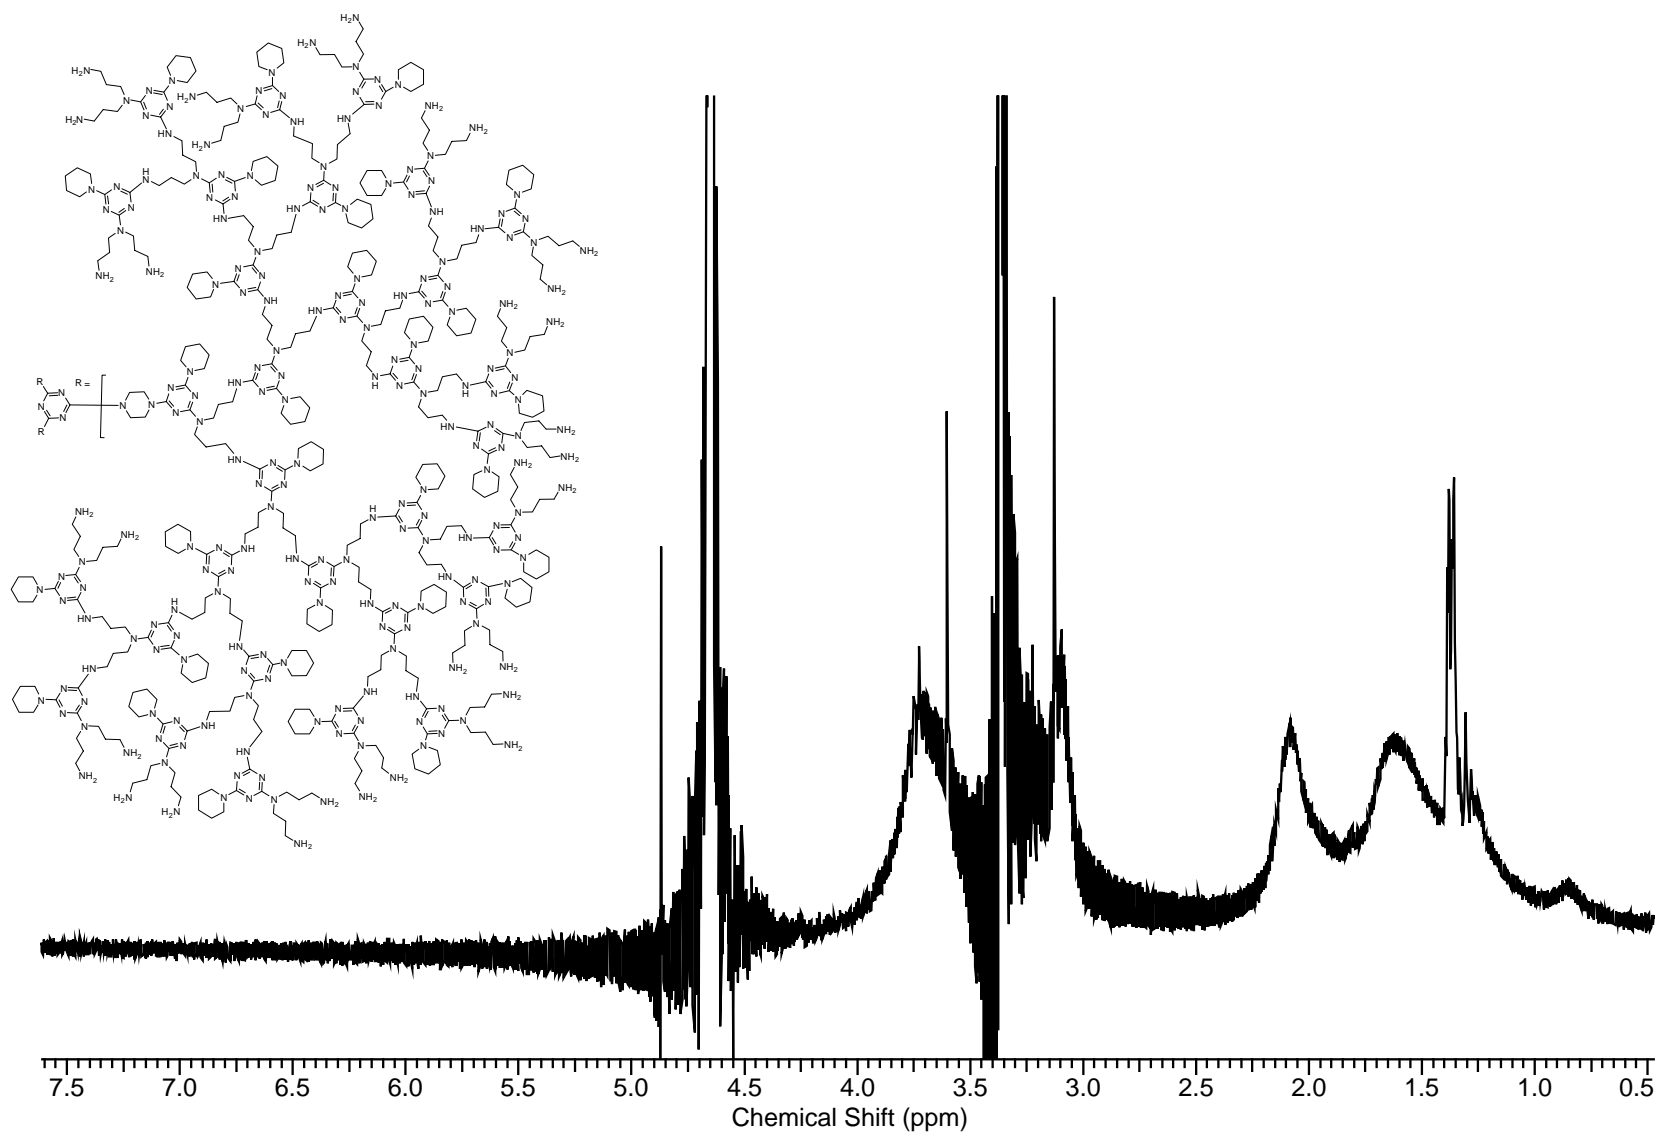

G1-Cl<sub>3</sub>Boc<sub>6</sub>

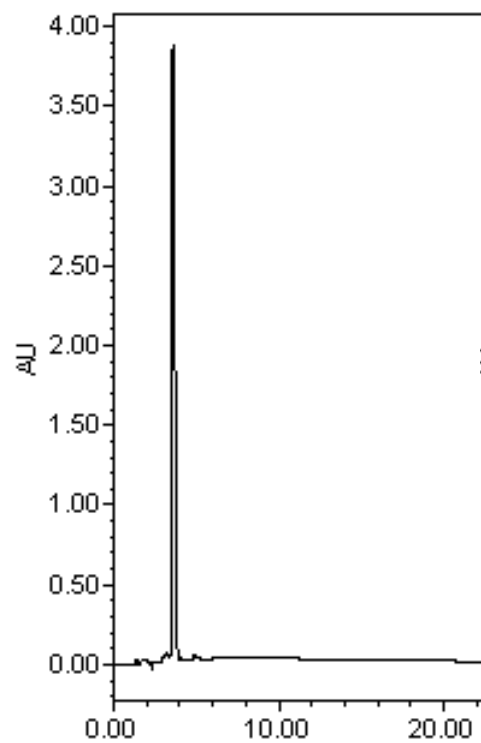

G2-Pip<sub>3</sub>Boc<sub>12</sub>Cl<sub>6</sub>

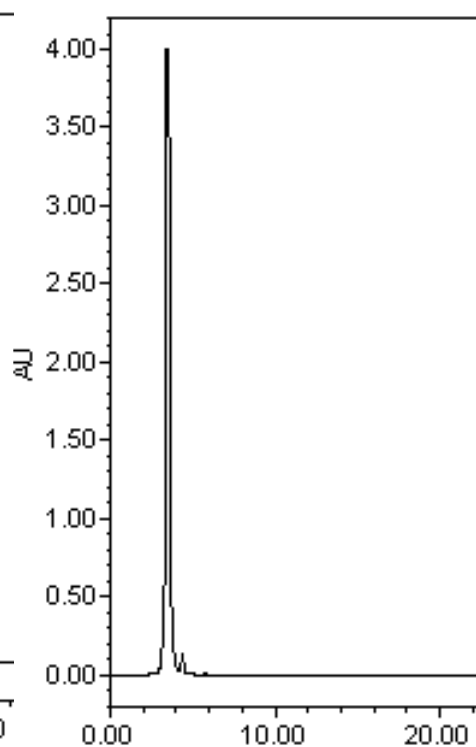

G3-Pip<sub>9</sub>Boc<sub>24</sub>Cl<sub>12</sub>

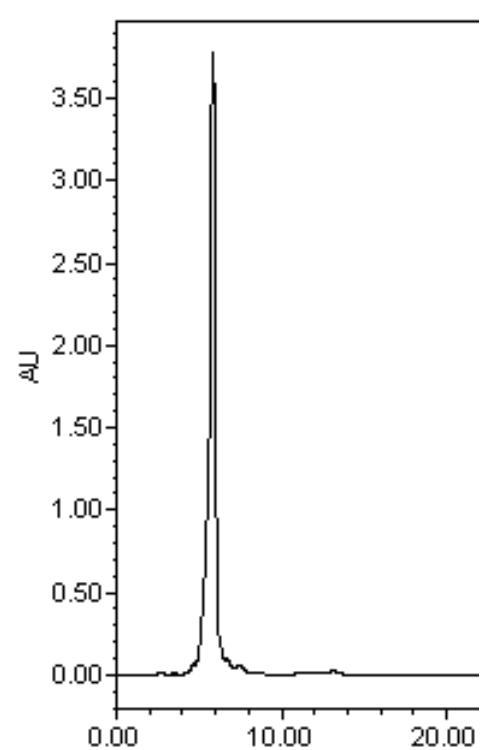

G4-Pip<sub>21</sub>Boc<sub>48</sub>Cl<sub>24</sub>

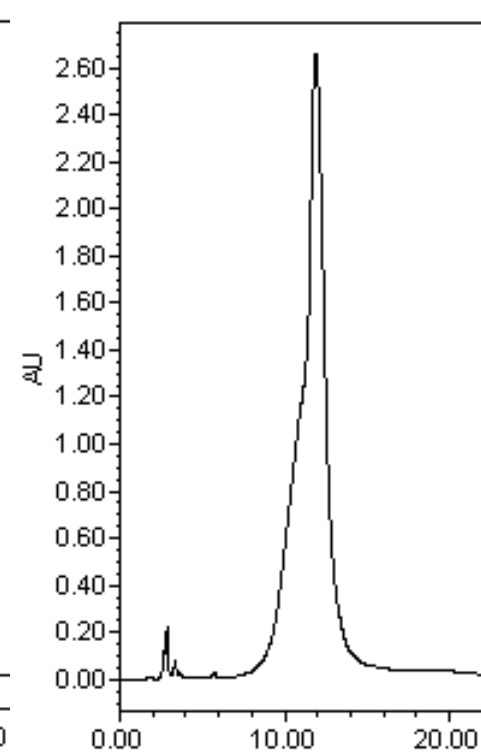

G1-Pip<sub>3</sub>Boc<sub>6</sub>

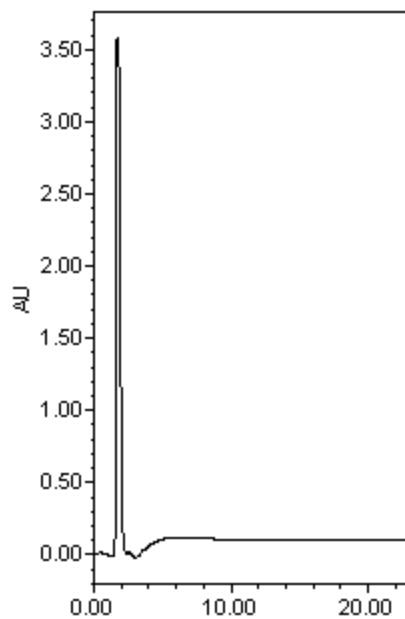

G2-Pip<sub>9</sub>Boc<sub>12</sub>

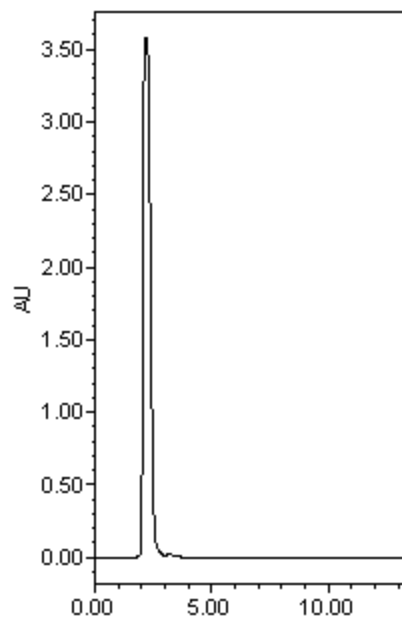

G3-Pip<sub>21</sub>Boc<sub>24</sub>

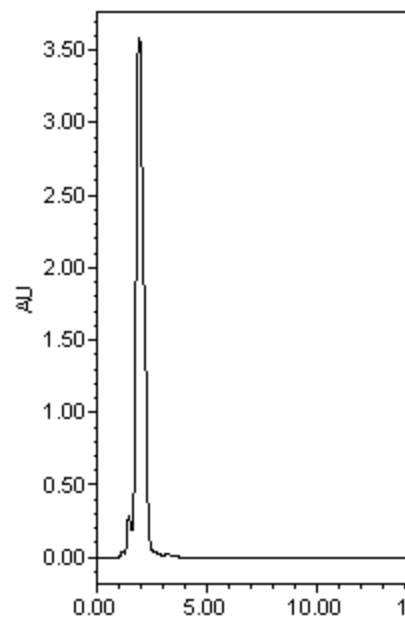

G4-Pip<sub>45</sub>Boc<sub>48</sub>

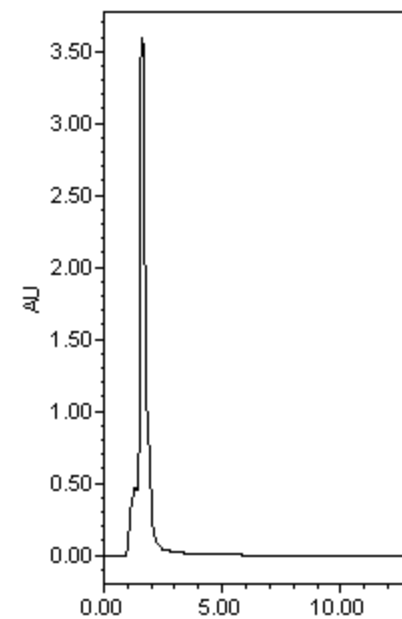

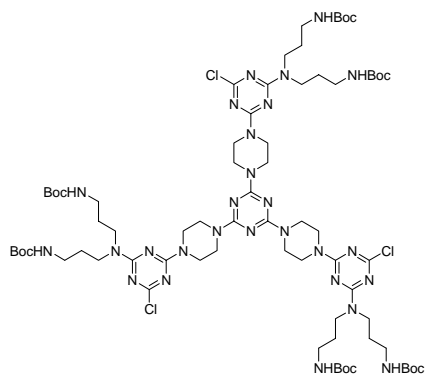

G1-Boc<sub>6</sub>Cl<sub>3</sub>

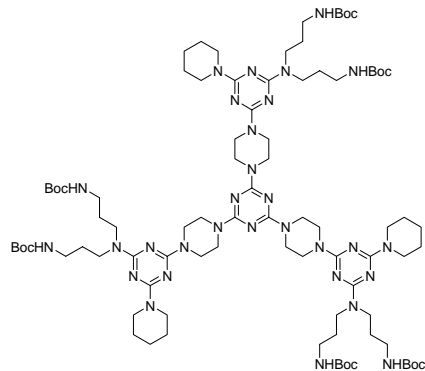

G1-Boc<sub>6</sub>Pip<sub>3</sub>

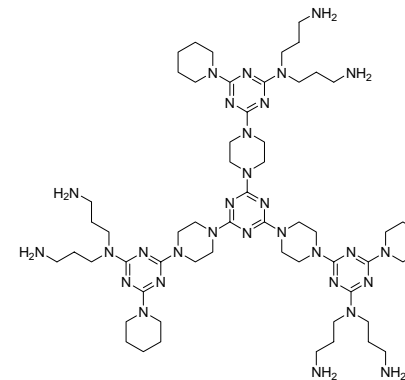

G1-Pip<sub>3</sub>(NH<sub>2</sub>)<sub>6</sub>

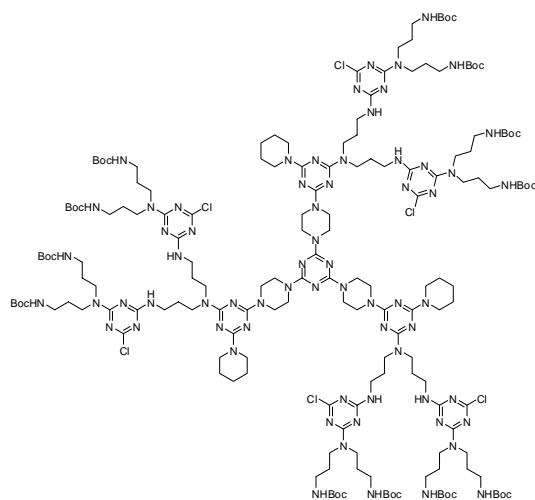

G2-Boc<sub>12</sub>Cl<sub>6</sub>

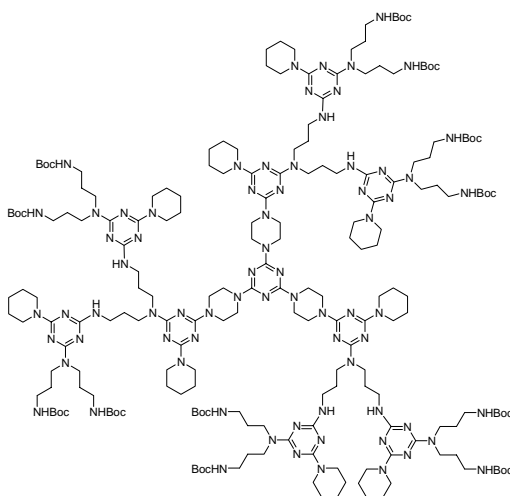

G2-Boc<sub>12</sub>Pip<sub>6</sub>

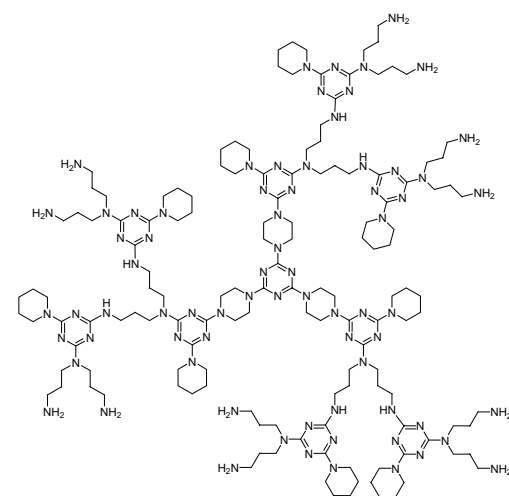

G2-Pip<sub>6</sub>(NH<sub>2</sub>)<sub>12</sub>

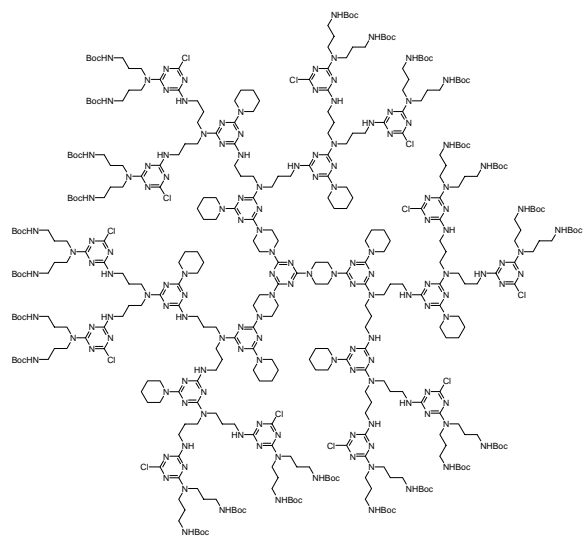

G3-Boc<sub>24</sub>Cl<sub>12</sub>

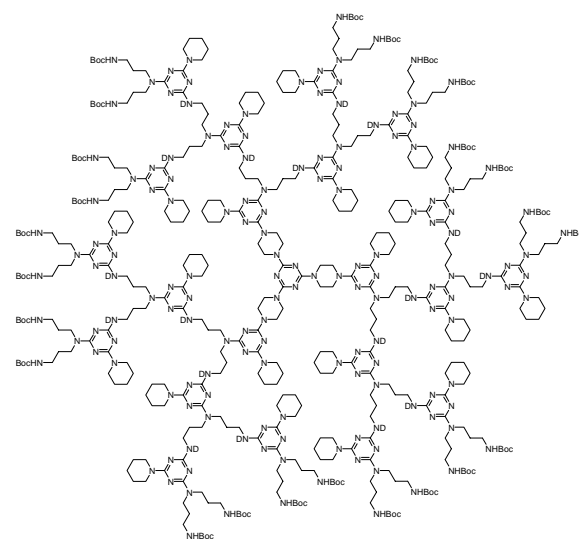

G3-Boc<sub>24</sub>Pip<sub>12</sub>

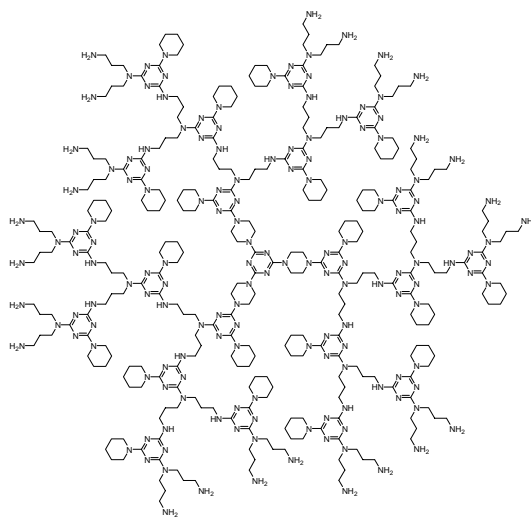

G3-Pip<sub>12</sub>(NH<sub>2</sub>)<sub>24</sub>

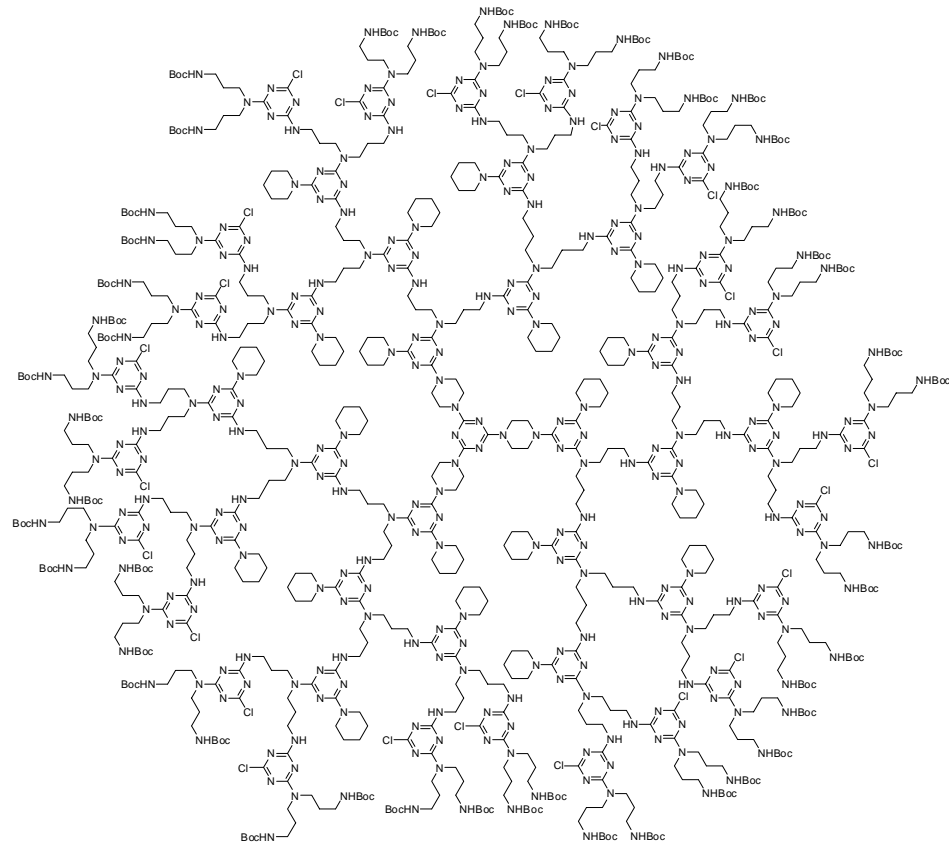

G4-Boc<sub>48</sub>Cl<sub>24</sub>

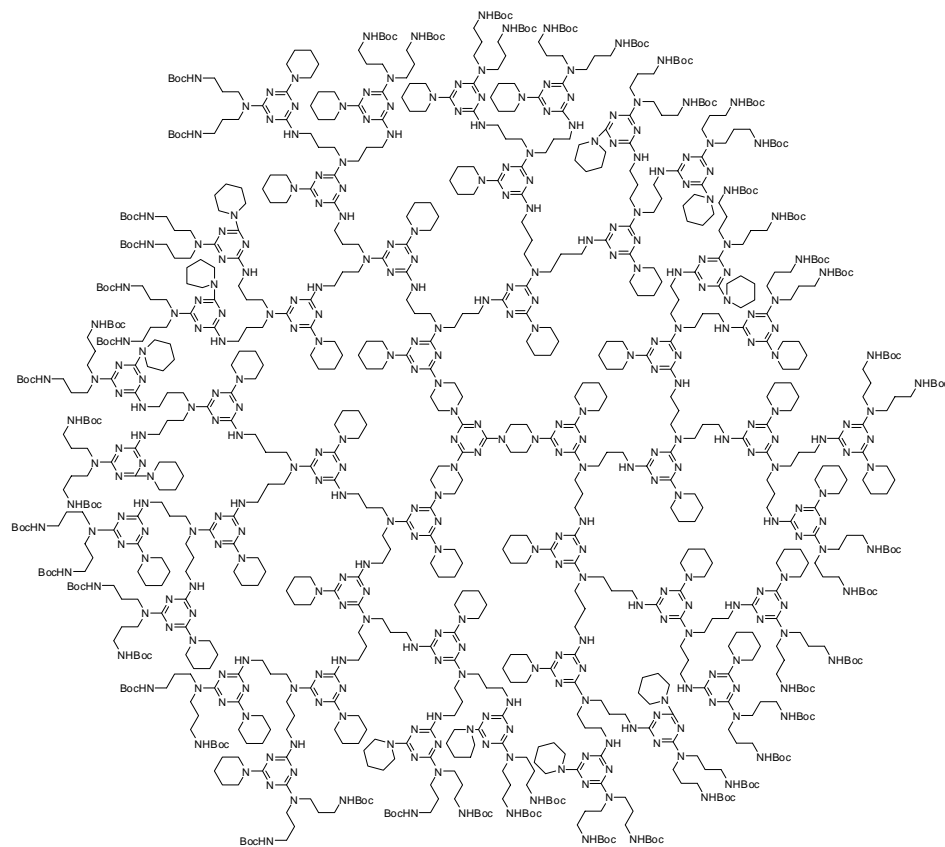

G4-Boc<sub>48</sub>Pip<sub>24</sub>

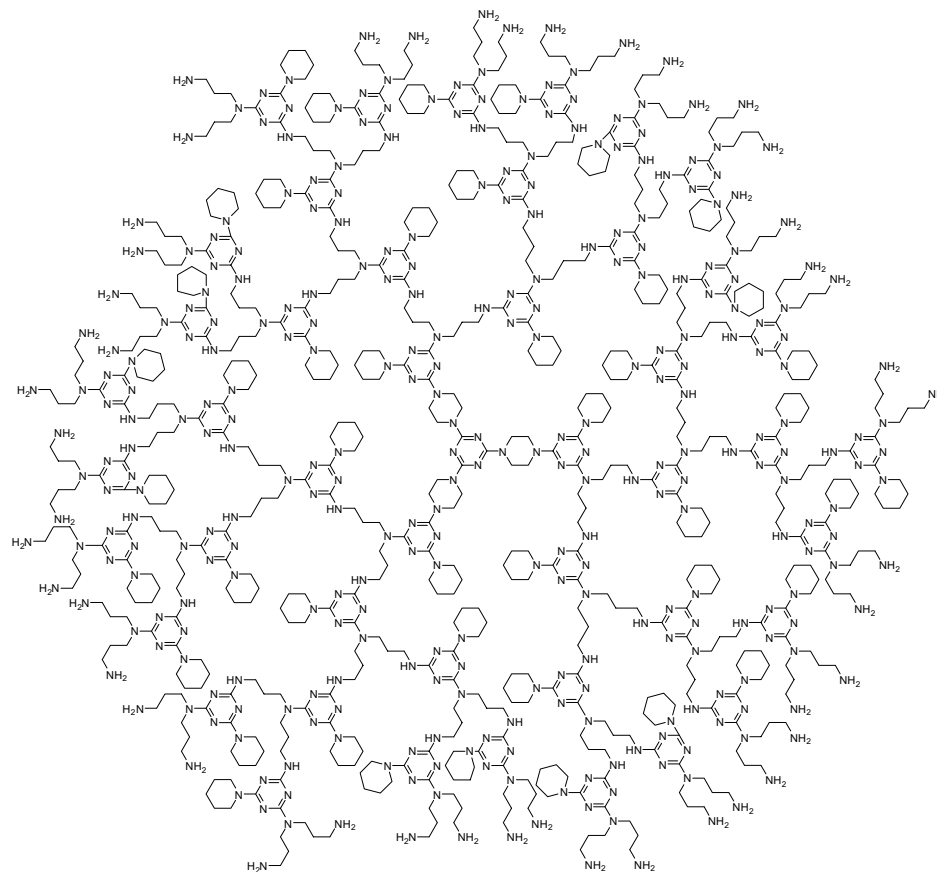

G4-Pip<sub>24</sub>(NH<sub>2</sub>)<sub>48</sub>



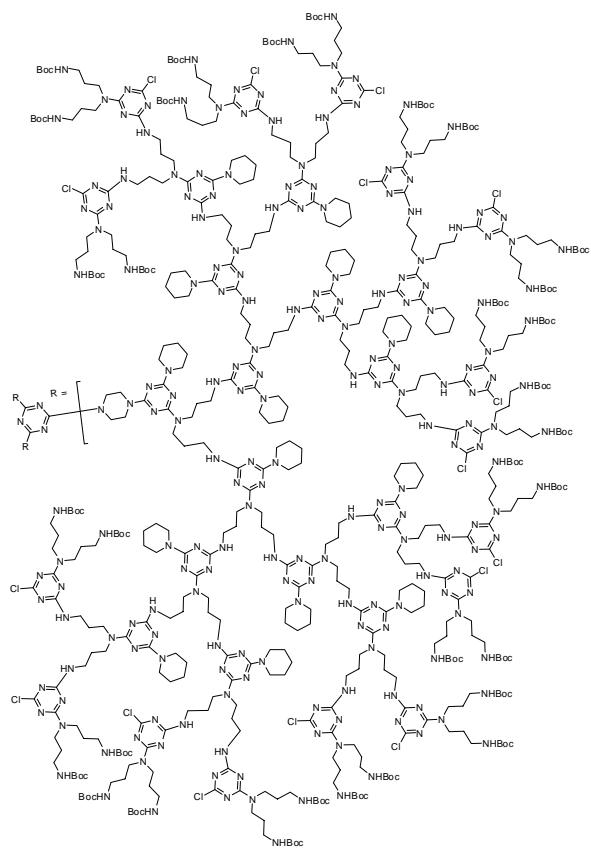

G5-Boc<sub>96</sub>Cl<sub>48</sub>

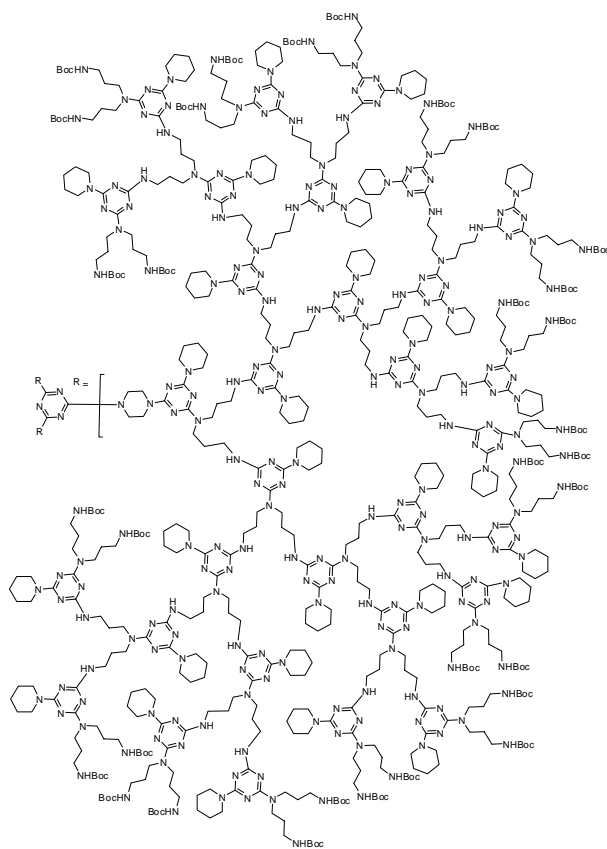

G5-Pip<sub>48</sub>Boc<sub>96</sub>

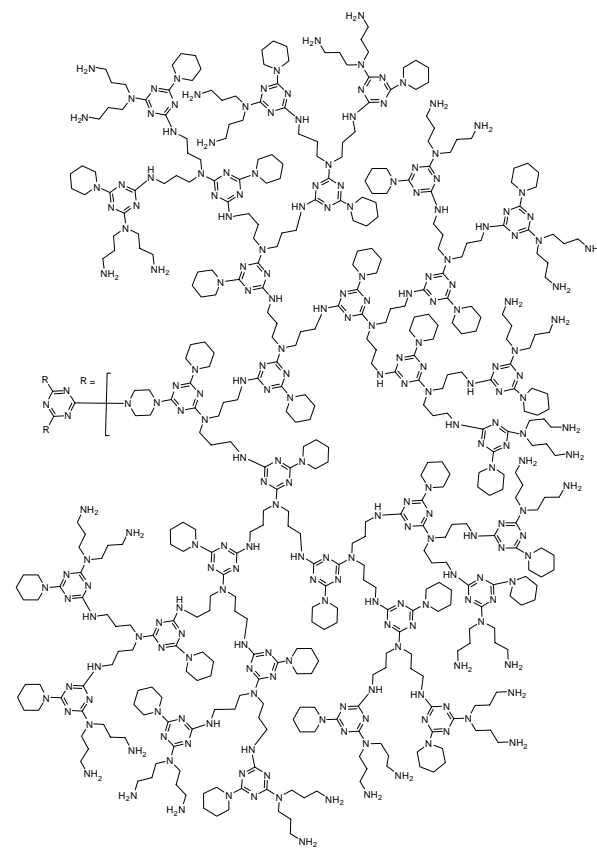

G5-Pip<sub>48</sub>(NH<sub>2</sub>)<sub>96</sub>
